# Supplementary material
Source: publisher site journal article supplement (https://www.dovepress.com/get_supplementary_file.php?f=385208.xlsx)
Supplement: Supplementary file 1 [file get_supplementary_file.php]

## Sheet: S1
Table S1 The ingredients and corresponding active targets of Fructus Forsythiae
Num	Herbs	compound	target genes (gene symbol)
1	Fructus Forsythiae	Betulinic Acid	ADRA1A
2	Fructus Forsythiae	Betulinic Acid	ADRB2
3	Fructus Forsythiae	Betulinic Acid	ADRA2A
4	Fructus Forsythiae	Betulinic Acid	ADRA1D
5	Fructus Forsythiae	Betulinic Acid	ADRA1B
6	Fructus Forsythiae	Betulinic Acid	ADRA2C
7	Fructus Forsythiae	Betulinic Acid	DBH
8	Fructus Forsythiae	Betulinic Acid	ALDH2
9	Fructus Forsythiae	Betulinic Acid	CALM2
10	Fructus Forsythiae	Betulinic Acid	CALM3
11	Fructus Forsythiae	Betulinic Acid	ADRA2B
12	Fructus Forsythiae	Betulinic Acid	CALM1
13	Fructus Forsythiae	Betulinic Acid	ABAT
14	Fructus Forsythiae	Betulinic Acid	ESRRG
15	Fructus Forsythiae	Betulinic Acid	COX6C
16	Fructus Forsythiae	Betulinic Acid	COX5B
17	Fructus Forsythiae	Betulinic Acid	SLC8A1
18	Fructus Forsythiae	Betulinic Acid	COX7C
19	Fructus Forsythiae	Betulinic Acid	COX1
20	Fructus Forsythiae	Betulinic Acid	F12
21	Fructus Forsythiae	Betulinic Acid	AKR1C2
22	Fructus Forsythiae	Betulinic Acid	TRPV1
23	Fructus Forsythiae	Betulinic Acid	AKR1D1
24	Fructus Forsythiae	Betulinic Acid	COX5A
25	Fructus Forsythiae	Betulinic Acid	COX3
26	Fructus Forsythiae	Betulinic Acid	AR
27	Fructus Forsythiae	Betulinic Acid	COX7A1
28	Fructus Forsythiae	Betulinic Acid	FECH
29	Fructus Forsythiae	Betulinic Acid	COX4I1
30	Fructus Forsythiae	Betulinic Acid	PLA2G1B
31	Fructus Forsythiae	Betulinic Acid	COX6A2
32	Fructus Forsythiae	Betulinic Acid	FADS2
33	Fructus Forsythiae	Betulinic Acid	TYR
34	Fructus Forsythiae	Betulinic Acid	FADS1
35	Fructus Forsythiae	Betulinic Acid	ADH1C
36	Fructus Forsythiae	Betulinic Acid	PTGS1
37	Fructus Forsythiae	Betulinic Acid	COX6B1
38	Fructus Forsythiae	Betulinic Acid	FABP6
39	Fructus Forsythiae	Betulinic Acid	CES1
40	Fructus Forsythiae	Betulinic Acid	PTGS2
41	Fructus Forsythiae	Betulinic Acid	ELOVL4
42	Fructus Forsythiae	Betulinic Acid	SRD5A2
43	Fructus Forsythiae	Betulinic Acid	COX7B
44	Fructus Forsythiae	Betulinic Acid	COX2
45	Fructus Forsythiae	Betulinic Acid	GABBR1
46	Fructus Forsythiae	Betulinic Acid	COX8A
47	Fructus Forsythiae	Betulinic Acid	NR1H4
48	Fructus Forsythiae	Betulinic Acid	HTR2A
49	Fructus Forsythiae	Betulinic Acid	ADORA2A
50	Fructus Forsythiae	Betulinic Acid	ESR1
51	Fructus Forsythiae	Betulinic Acid	NR3C1
52	Fructus Forsythiae	Betulinic Acid	DRD2
53	Fructus Forsythiae	Betulinic Acid	CPT2
54	Fructus Forsythiae	Betulinic Acid	HRH1
55	Fructus Forsythiae	Betulinic Acid	KCNH2
56	Fructus Forsythiae	Betulinic Acid	HBA2
57	Fructus Forsythiae	Betulinic Acid	ATP1A1
58	Fructus Forsythiae	Betulinic Acid	KCNN4
59	Fructus Forsythiae	Betulinic Acid	DRD3
60	Fructus Forsythiae	Betulinic Acid	CPT1A
61	Fructus Forsythiae	Betulinic Acid	HBA1
62	Fructus Forsythiae	Betulinic Acid	CACNG1
63	Fructus Forsythiae	Betulinic Acid	ADH1B
64	Fructus Forsythiae	Betulinic Acid	AKR1C1
65	Fructus Forsythiae	Betulinic Acid	HMGCR
66	Fructus Forsythiae	(+)-Pinoresinol	SEC14L3
67	Fructus Forsythiae	(+)-Pinoresinol	PPP2CA
68	Fructus Forsythiae	(+)-Pinoresinol	PRKCA
69	Fructus Forsythiae	(+)-Pinoresinol	NR1I2
70	Fructus Forsythiae	(+)-Pinoresinol	ALOX5
71	Fructus Forsythiae	(+)-Pinoresinol	PPP2CB
72	Fructus Forsythiae	(+)-Pinoresinol	SEC14L2
73	Fructus Forsythiae	(+)-Pinoresinol	DGKA
74	Fructus Forsythiae	(+)-Pinoresinol	PRKCB
75	Fructus Forsythiae	(+)-Pinoresinol	SEC14L4
76	Fructus Forsythiae	Scopine	CHRM3
77	Fructus Forsythiae	Scopine	CHRM1
78	Fructus Forsythiae	Scopine	CHRM5
79	Fructus Forsythiae	Scopine	CHRNA2
80	Fructus Forsythiae	Scopine	SI
81	Fructus Forsythiae	Scopine	HTR3A
82	Fructus Forsythiae	Scopine	CHRM2
83	Fructus Forsythiae	Scopine	CHRM4
84	Fructus Forsythiae	3beta-Acetyl-20,25-Epoxydammarane-24alpha-Ol	AR
85	Fructus Forsythiae	Scoparone	CHRNA4
86	Fructus Forsythiae	Scoparone	GRIN3B
87	Fructus Forsythiae	Scoparone	CHRNA7
88	Fructus Forsythiae	Scoparone	GRIN2A
89	Fructus Forsythiae	Scoparone	GRIA2
90	Fructus Forsythiae	Scoparone	GRIN2C
91	Fructus Forsythiae	Scoparone	GRIN2B
92	Fructus Forsythiae	Scoparone	GRIN3A
93	Fructus Forsythiae	Scoparone	GABRA1
94	Fructus Forsythiae	Scoparone	GRIN2D
95	Fructus Forsythiae	Scoparone	CHRFAM7A
96	Fructus Forsythiae	Scoparone	GRIK2
97	Fructus Forsythiae	Scoparone	GRIN1
98	Fructus Forsythiae	Scoparone	GRIK3
99	Fructus Forsythiae	Beta-Amyrin Acetate	ESR1
100	Fructus Forsythiae	Beta-Amyrin Acetate	PGR
101	Fructus Forsythiae	Beta-Amyrin Acetate	AR
102	Fructus Forsythiae	Beta-Amyrin Acetate	NR3C1
103	Fructus Forsythiae	Beta-Amyrin Acetate	CYP19A1
104	Fructus Forsythiae	Beta-Amyrin Acetate	NR3C2
105	Fructus Forsythiae	D-Limonene	KCND1
106	Fructus Forsythiae	D-Limonene	KCNA3
107	Fructus Forsythiae	D-Limonene	PRKAB1
108	Fructus Forsythiae	D-Limonene	ADH1A
109	Fructus Forsythiae	D-Limonene	KCNA10
110	Fructus Forsythiae	D-Limonene	GAMT
111	Fructus Forsythiae	D-Limonene	KCNC3
112	Fructus Forsythiae	D-Limonene	KCNA1
113	Fructus Forsythiae	D-Limonene	KCNA2
114	Fructus Forsythiae	D-Limonene	TPO
115	Fructus Forsythiae	D-Limonene	CAT
116	Fructus Forsythiae	D-Limonene	KCNB1
117	Fructus Forsythiae	D-Limonene	ADH1B
118	Fructus Forsythiae	D-Limonene	DLG4
119	Fructus Forsythiae	D-Limonene	KCNC2
120	Fructus Forsythiae	D-Limonene	KCNC1
121	Fructus Forsythiae	D-Limonene	ADH1C
122	Fructus Forsythiae	D-Limonene	KCNB2
123	Fructus Forsythiae	D-Limonene	KCNA5
124	Fructus Forsythiae	D-Limonene	RNASE1
125	Fructus Forsythiae	D-Limonene	KCND2
126	Fructus Forsythiae	D-Limonene	ALDH2
127	Fructus Forsythiae	D-Limonene	KCNA4
128	Fructus Forsythiae	D-Limonene	KCNA7
129	Fructus Forsythiae	D-Limonene	KCNA6
130	Fructus Forsythiae	D-Limonene	KCND3
131	Fructus Forsythiae	D-Limonene	GUCY1B3
132	Fructus Forsythiae	D-Limonene	GATM
133	Fructus Forsythiae	D-Limonene	KCNK4
134	Fructus Forsythiae	D-Limonene	IYD
135	Fructus Forsythiae	D-Limonene	KCNQ1
136	Fructus Forsythiae	D-Limonene	CYP17A1
137	Fructus Forsythiae	D-Limonene	ESR1
138	Fructus Forsythiae	D-Limonene	PGR
139	Fructus Forsythiae	D-Limonene	OPRK1
140	Fructus Forsythiae	D-Limonene	NR3C2
141	Fructus Forsythiae	D-Limonene	FBP1
142	Fructus Forsythiae	D-Limonene	DGKI
143	Fructus Forsythiae	D-Limonene	ADH7
144	Fructus Forsythiae	D-Limonene	NFIB
145	Fructus Forsythiae	D-Limonene	CYGB
146	Fructus Forsythiae	D-Limonene	NRXN3
147	Fructus Forsythiae	D-Limonene	LRRC4B
148	Fructus Forsythiae	D-Limonene	AQP8
149	Fructus Forsythiae	D-Limonene	ARX
150	Fructus Forsythiae	D-Limonene	IGF1
151	Fructus Forsythiae	D-Limonene	SHANK3
152	Fructus Forsythiae	D-Limonene	ACY3
153	Fructus Forsythiae	D-Limonene	ASPA
154	Fructus Forsythiae	D-Limonene	NRXN1
155	Fructus Forsythiae	D-Limonene	EDN1
156	Fructus Forsythiae	D-Limonene	OXT
157	Fructus Forsythiae	D-Limonene	MAGI2
158	Fructus Forsythiae	D-Limonene	APOE
159	Fructus Forsythiae	D-Limonene	SOX15
160	Fructus Forsythiae	D-Limonene	CNTNAP4
161	Fructus Forsythiae	D-Limonene	RNASE4
162	Fructus Forsythiae	D-Limonene	RAB3A
163	Fructus Forsythiae	D-Limonene	MC4R
164	Fructus Forsythiae	D-Limonene	IL1B
165	Fructus Forsythiae	D-Limonene	GRIN2A
166	Fructus Forsythiae	D-Limonene	SLC17A7
167	Fructus Forsythiae	D-Limonene	CYP11A1
168	Fructus Forsythiae	D-Limonene	SCN5A
169	Fructus Forsythiae	D-Limonene	SCN10A
170	Fructus Forsythiae	D-Limonene	SPARC
171	Fructus Forsythiae	D-Limonene	SORCS3
172	Fructus Forsythiae	D-Limonene	RNASE8
173	Fructus Forsythiae	D-Limonene	KCNIP2
174	Fructus Forsythiae	D-Limonene	GPX7
175	Fructus Forsythiae	D-Limonene	CRLF1
176	Fructus Forsythiae	D-Limonene	FADD
177	Fructus Forsythiae	D-Limonene	SNTG2
178	Fructus Forsythiae	D-Limonene	SCGB1A1
179	Fructus Forsythiae	D-Limonene	OXTR
180	Fructus Forsythiae	D-Limonene	ALDH1B1
181	Fructus Forsythiae	D-Limonene	LEP
182	Fructus Forsythiae	D-Limonene	NLGN1
183	Fructus Forsythiae	D-Limonene	CACNA1D
184	Fructus Forsythiae	D-Limonene	RAPGEF2
185	Fructus Forsythiae	D-Limonene	DARS
186	Fructus Forsythiae	D-Limonene	ANK3
187	Fructus Forsythiae	D-Limonene	KCNE5
188	Fructus Forsythiae	D-Limonene	PPARD
189	Fructus Forsythiae	D-Limonene	NKX2-1
190	Fructus Forsythiae	D-Limonene	MIP
191	Fructus Forsythiae	D-Limonene	RYR3
192	Fructus Forsythiae	D-Limonene	ZPR1
193	Fructus Forsythiae	D-Limonene	ALDH3B1
194	Fructus Forsythiae	D-Limonene	NPPA
195	Fructus Forsythiae	D-Limonene	STX1A
196	Fructus Forsythiae	D-Limonene	PAXBP1
197	Fructus Forsythiae	D-Limonene	PAX7
198	Fructus Forsythiae	D-Limonene	ALDH3B2
199	Fructus Forsythiae	D-Limonene	RNASE2
200	Fructus Forsythiae	D-Limonene	NRXN2
201	Fructus Forsythiae	D-Limonene	ADORA1
202	Fructus Forsythiae	D-Limonene	ADH4
203	Fructus Forsythiae	D-Limonene	GJA5
204	Fructus Forsythiae	D-Limonene	FAS
205	Fructus Forsythiae	D-Limonene	DAB2IP
206	Fructus Forsythiae	D-Limonene	CYP2E1
207	Fructus Forsythiae	D-Limonene	ACY1
208	Fructus Forsythiae	Camphene	KCND1
209	Fructus Forsythiae	Camphene	KCNA3
210	Fructus Forsythiae	Camphene	PRKAB1
211	Fructus Forsythiae	Camphene	ADH1A
212	Fructus Forsythiae	Camphene	KCNA10
213	Fructus Forsythiae	Camphene	GAMT
214	Fructus Forsythiae	Camphene	KCNC3
215	Fructus Forsythiae	Camphene	KCNA1
216	Fructus Forsythiae	Camphene	KCNA2
217	Fructus Forsythiae	Camphene	TPO
218	Fructus Forsythiae	Camphene	CAT
219	Fructus Forsythiae	Camphene	KCNB1
220	Fructus Forsythiae	Camphene	ADH1B
221	Fructus Forsythiae	Camphene	DLG4
222	Fructus Forsythiae	Camphene	KCNC2
223	Fructus Forsythiae	Camphene	KCNC1
224	Fructus Forsythiae	Camphene	ADH1C
225	Fructus Forsythiae	Camphene	KCNB2
226	Fructus Forsythiae	Camphene	KCNA5
227	Fructus Forsythiae	Camphene	RNASE1
228	Fructus Forsythiae	Camphene	KCND2
229	Fructus Forsythiae	Camphene	ALDH2
230	Fructus Forsythiae	Camphene	KCNA4
231	Fructus Forsythiae	Camphene	KCNA7
232	Fructus Forsythiae	Camphene	KCNA6
233	Fructus Forsythiae	Camphene	KCND3
234	Fructus Forsythiae	Camphene	GUCY1B3
235	Fructus Forsythiae	Camphene	GATM
236	Fructus Forsythiae	Camphene	KCNK4
237	Fructus Forsythiae	Camphene	IYD
238	Fructus Forsythiae	Camphene	KCNQ1
239	Fructus Forsythiae	Camphene	FBP1
240	Fructus Forsythiae	Camphene	DGKI
241	Fructus Forsythiae	Camphene	ADH7
242	Fructus Forsythiae	Camphene	NFIB
243	Fructus Forsythiae	Camphene	CYGB
244	Fructus Forsythiae	Camphene	NRXN3
245	Fructus Forsythiae	Camphene	LRRC4B
246	Fructus Forsythiae	Camphene	AQP8
247	Fructus Forsythiae	Camphene	ARX
248	Fructus Forsythiae	Camphene	IGF1
249	Fructus Forsythiae	Camphene	SHANK3
250	Fructus Forsythiae	Camphene	ACY3
251	Fructus Forsythiae	Camphene	ASPA
252	Fructus Forsythiae	Camphene	NRXN1
253	Fructus Forsythiae	Camphene	EDN1
254	Fructus Forsythiae	Camphene	OXT
255	Fructus Forsythiae	Camphene	MAGI2
256	Fructus Forsythiae	Camphene	APOE
257	Fructus Forsythiae	Camphene	SOX15
258	Fructus Forsythiae	Camphene	CNTNAP4
259	Fructus Forsythiae	Camphene	RNASE4
260	Fructus Forsythiae	Camphene	RAB3A
261	Fructus Forsythiae	Camphene	MC4R
262	Fructus Forsythiae	Camphene	IL1B
263	Fructus Forsythiae	Camphene	GRIN2A
264	Fructus Forsythiae	Camphene	SLC17A7
265	Fructus Forsythiae	Camphene	CYP11A1
266	Fructus Forsythiae	Camphene	SCN5A
267	Fructus Forsythiae	Camphene	SCN10A
268	Fructus Forsythiae	Camphene	SPARC
269	Fructus Forsythiae	Camphene	SORCS3
270	Fructus Forsythiae	Camphene	RNASE8
271	Fructus Forsythiae	Camphene	KCNIP2
272	Fructus Forsythiae	Camphene	GPX7
273	Fructus Forsythiae	Camphene	CRLF1
274	Fructus Forsythiae	Camphene	FADD
275	Fructus Forsythiae	Camphene	SNTG2
276	Fructus Forsythiae	Camphene	SCGB1A1
277	Fructus Forsythiae	Camphene	OXTR
278	Fructus Forsythiae	Camphene	ALDH1B1
279	Fructus Forsythiae	Camphene	LEP
280	Fructus Forsythiae	Camphene	NLGN1
281	Fructus Forsythiae	Camphene	CACNA1D
282	Fructus Forsythiae	Camphene	RAPGEF2
283	Fructus Forsythiae	Camphene	DARS
284	Fructus Forsythiae	Camphene	ANK3
285	Fructus Forsythiae	Camphene	KCNE5
286	Fructus Forsythiae	Camphene	PPARD
287	Fructus Forsythiae	Camphene	NKX2-1
288	Fructus Forsythiae	Camphene	MIP
289	Fructus Forsythiae	Camphene	RYR3
290	Fructus Forsythiae	Camphene	ZPR1
291	Fructus Forsythiae	Camphene	ALDH3B1
292	Fructus Forsythiae	Camphene	NPPA
293	Fructus Forsythiae	Camphene	STX1A
294	Fructus Forsythiae	Camphene	PAXBP1
295	Fructus Forsythiae	Camphene	PAX7
296	Fructus Forsythiae	Camphene	ALDH3B2
297	Fructus Forsythiae	Camphene	RNASE2
298	Fructus Forsythiae	Camphene	NRXN2
299	Fructus Forsythiae	Camphene	ADORA1
300	Fructus Forsythiae	Camphene	ADH4
301	Fructus Forsythiae	Camphene	GJA5
302	Fructus Forsythiae	Camphene	FAS
303	Fructus Forsythiae	Camphene	DAB2IP
304	Fructus Forsythiae	Camphene	CYP2E1
305	Fructus Forsythiae	Camphene	ACY1
306	Fructus Forsythiae	P-Cymene	GABRB2
307	Fructus Forsythiae	P-Cymene	GABRB3
308	Fructus Forsythiae	P-Cymene	F2
309	Fructus Forsythiae	P-Cymene	GPR27
310	Fructus Forsythiae	P-Cymene	CD36
311	Fructus Forsythiae	P-Cymene	SDC4
312	Fructus Forsythiae	P-Cymene	CD47
313	Fructus Forsythiae	P-Cymene	BICD1
314	Fructus Forsythiae	(-)-Pinoresinol	SEC14L3
315	Fructus Forsythiae	(-)-Pinoresinol	PPP2CA
316	Fructus Forsythiae	(-)-Pinoresinol	PRKCA
317	Fructus Forsythiae	(-)-Pinoresinol	NR1I2
318	Fructus Forsythiae	(-)-Pinoresinol	ALOX5
319	Fructus Forsythiae	(-)-Pinoresinol	PPP2CB
320	Fructus Forsythiae	(-)-Pinoresinol	SEC14L2
321	Fructus Forsythiae	(-)-Pinoresinol	DGKA
322	Fructus Forsythiae	(-)-Pinoresinol	PRKCB
323	Fructus Forsythiae	(-)-Pinoresinol	SEC14L4
324	Fructus Forsythiae	Matairesinoside	TOP2A
325	Fructus Forsythiae	Matairesinoside	TOP2B
326	Fructus Forsythiae	Octacosanedioic Acid	AKR1D1
327	Fructus Forsythiae	Octacosanedioic Acid	TYR
328	Fructus Forsythiae	Octacosanedioic Acid	SRD5A2
329	Fructus Forsythiae	Octacosanedioic Acid	SCN11A
330	Fructus Forsythiae	Octacosanedioic Acid	SCN2B
331	Fructus Forsythiae	Octacosanedioic Acid	ABAT
332	Fructus Forsythiae	Octacosanedioic Acid	SCN1A
333	Fructus Forsythiae	Octacosanedioic Acid	ESRRG
334	Fructus Forsythiae	Octacosanedioic Acid	SCN3B
335	Fructus Forsythiae	Octacosanedioic Acid	COX6C
336	Fructus Forsythiae	Octacosanedioic Acid	COX5B
337	Fructus Forsythiae	Octacosanedioic Acid	COX7C
338	Fructus Forsythiae	Octacosanedioic Acid	COX1
339	Fructus Forsythiae	Octacosanedioic Acid	SCN3A
340	Fructus Forsythiae	Octacosanedioic Acid	AKR1C2
341	Fructus Forsythiae	Octacosanedioic Acid	SCN7A
342	Fructus Forsythiae	Octacosanedioic Acid	SCN5A
343	Fructus Forsythiae	Octacosanedioic Acid	SCN10A
344	Fructus Forsythiae	Octacosanedioic Acid	ALDH5A1
345	Fructus Forsythiae	Octacosanedioic Acid	SCN2A
346	Fructus Forsythiae	Octacosanedioic Acid	COX5A
347	Fructus Forsythiae	Octacosanedioic Acid	COX3
348	Fructus Forsythiae	Octacosanedioic Acid	AR
349	Fructus Forsythiae	Octacosanedioic Acid	COX7A1
350	Fructus Forsythiae	Octacosanedioic Acid	FECH
351	Fructus Forsythiae	Octacosanedioic Acid	COX4I1
352	Fructus Forsythiae	Octacosanedioic Acid	HDAC9
353	Fructus Forsythiae	Octacosanedioic Acid	PLA2G1B
354	Fructus Forsythiae	Octacosanedioic Acid	COX6A2
355	Fructus Forsythiae	Octacosanedioic Acid	SCN9A
356	Fructus Forsythiae	Octacosanedioic Acid	SCN4A
357	Fructus Forsythiae	Octacosanedioic Acid	SCN4B
358	Fructus Forsythiae	Octacosanedioic Acid	ADH1C
359	Fructus Forsythiae	Octacosanedioic Acid	COX6B1
360	Fructus Forsythiae	Octacosanedioic Acid	FABP6
361	Fructus Forsythiae	Octacosanedioic Acid	CES1
362	Fructus Forsythiae	Octacosanedioic Acid	ACADSB
363	Fructus Forsythiae	Octacosanedioic Acid	SCN8A
364	Fructus Forsythiae	Octacosanedioic Acid	COX7B
365	Fructus Forsythiae	Octacosanedioic Acid	SCN1B
366	Fructus Forsythiae	Octacosanedioic Acid	COX2
367	Fructus Forsythiae	Octacosanedioic Acid	OGDH
368	Fructus Forsythiae	Octacosanedioic Acid	HDAC2
369	Fructus Forsythiae	Octacosanedioic Acid	COX8A
370	Fructus Forsythiae	Octacosanedioic Acid	NR1H4
371	Fructus Forsythiae	Octacosanedioic Acid	SUCLG2
372	Fructus Forsythiae	Octacosanedioic Acid	SLC13A2
373	Fructus Forsythiae	Octacosanedioic Acid	SLC13A1
374	Fructus Forsythiae	Octacosanedioic Acid	SUCLG1
375	Fructus Forsythiae	Octacosanedioic Acid	HSD17B6
376	Fructus Forsythiae	Octacosanedioic Acid	SLC25A10
377	Fructus Forsythiae	Octacosanedioic Acid	P3H3
378	Fructus Forsythiae	Octacosanedioic Acid	OXCT2
379	Fructus Forsythiae	Octacosanedioic Acid	TMLHE
380	Fructus Forsythiae	Octacosanedioic Acid	PLOD1
381	Fructus Forsythiae	Octacosanedioic Acid	SUCNR1
382	Fructus Forsythiae	Octacosanedioic Acid	SLC13A3
383	Fructus Forsythiae	Octacosanedioic Acid	ASPH
384	Fructus Forsythiae	Octacosanedioic Acid	BBOX1
385	Fructus Forsythiae	Octacosanedioic Acid	SDHB
386	Fructus Forsythiae	Octacosanedioic Acid	OXCT1
387	Fructus Forsythiae	Octacosanedioic Acid	PLOD3
388	Fructus Forsythiae	Octacosanedioic Acid	P4HA1
389	Fructus Forsythiae	Octacosanedioic Acid	SDHC
390	Fructus Forsythiae	Octacosanedioic Acid	P3H2
391	Fructus Forsythiae	Octacosanedioic Acid	SDHA
392	Fructus Forsythiae	Octacosanedioic Acid	P4HA2
393	Fructus Forsythiae	Octacosanedioic Acid	SUCLA2
394	Fructus Forsythiae	Octacosanedioic Acid	SDHD
395	Fructus Forsythiae	Octacosanedioic Acid	P3H1
396	Fructus Forsythiae	Octacosanedioic Acid	DCT
397	Fructus Forsythiae	Octacosanedioic Acid	AKR1C3
398	Fructus Forsythiae	Octacosanedioic Acid	CRTAP
399	Fructus Forsythiae	Octacosanedioic Acid	SLIT2
400	Fructus Forsythiae	Octacosanedioic Acid	ACO2
401	Fructus Forsythiae	Octacosanedioic Acid	JMJD6
402	Fructus Forsythiae	Octacosanedioic Acid	SLC13A4
403	Fructus Forsythiae	Octacosanedioic Acid	SDHAF2
404	Fructus Forsythiae	Octacosanedioic Acid	SLC1A3
405	Fructus Forsythiae	Octacosanedioic Acid	SALL1
406	Fructus Forsythiae	Octacosanedioic Acid	HSD17B11
407	Fructus Forsythiae	Octacosanedioic Acid	TYRP1
408	Fructus Forsythiae	Octacosanedioic Acid	HIF1AN
409	Fructus Forsythiae	Octacosanedioic Acid	UROS
410	Fructus Forsythiae	Octacosanedioic Acid	SLC13A5
411	Fructus Forsythiae	Octacosanedioic Acid	P4HB
412	Fructus Forsythiae	Octacosanedioic Acid	CACNA2D1
413	Fructus Forsythiae	Octacosanedioic Acid	PLAT
414	Fructus Forsythiae	Octacosanedioic Acid	SLC7A2
415	Fructus Forsythiae	Octacosanedioic Acid	CACNA1A
416	Fructus Forsythiae	Octacosanedioic Acid	GRIN3B
417	Fructus Forsythiae	Octacosanedioic Acid	CACNA2D2
418	Fructus Forsythiae	Octacosanedioic Acid	GRIN2A
419	Fructus Forsythiae	Octacosanedioic Acid	TOP1
420	Fructus Forsythiae	Octacosanedioic Acid	PLG
421	Fructus Forsythiae	Octacosanedioic Acid	CACNA1B
422	Fructus Forsythiae	Octacosanedioic Acid	GRIN2C
423	Fructus Forsythiae	Octacosanedioic Acid	GRIN2B
424	Fructus Forsythiae	Octacosanedioic Acid	SLC7A3
425	Fructus Forsythiae	Octacosanedioic Acid	KARS
426	Fructus Forsythiae	Octacosanedioic Acid	GRIN3A
427	Fructus Forsythiae	Octacosanedioic Acid	SLC7A1
428	Fructus Forsythiae	Octacosanedioic Acid	SLC7A4
429	Fructus Forsythiae	Octacosanedioic Acid	GRIN2D
430	Fructus Forsythiae	Octacosanedioic Acid	ADORA1
431	Fructus Forsythiae	Octacosanedioic Acid	GRIN1
432	Fructus Forsythiae	Octacosanedioic Acid	HDAC1
433	Fructus Forsythiae	Octacosanedioic Acid	GPD1L
434	Fructus Forsythiae	Octacosanedioic Acid	SRD5A1
435	Fructus Forsythiae	Octacosanedioic Acid	FBXO45
436	Fructus Forsythiae	Octacosanedioic Acid	SIRT1
437	Fructus Forsythiae	Octacosanedioic Acid	SHMT1
438	Fructus Forsythiae	Octacosanedioic Acid	SUGCT
439	Fructus Forsythiae	Octacosanedioic Acid	ACSS2
440	Fructus Forsythiae	Octacosanedioic Acid	ARV1
441	Fructus Forsythiae	Octacosanedioic Acid	SIX1
442	Fructus Forsythiae	Octacosanedioic Acid	BDH1
443	Fructus Forsythiae	Octacosanedioic Acid	COLGALT2
444	Fructus Forsythiae	Octacosanedioic Acid	SIX4
445	Fructus Forsythiae	Octacosanedioic Acid	MRPS36
446	Fructus Forsythiae	Octacosanedioic Acid	OSBPL8
447	Fructus Forsythiae	Octacosanedioic Acid	SPI1
448	Fructus Forsythiae	Octacosanedioic Acid	SUOX
449	Fructus Forsythiae	Octacosanedioic Acid	CCL2
450	Fructus Forsythiae	Octacosanedioic Acid	BCKDK
451	Fructus Forsythiae	Octacosanedioic Acid	UBE2B
452	Fructus Forsythiae	Octacosanedioic Acid	CYP1A2
453	Fructus Forsythiae	Octacosanedioic Acid	CCL5
454	Fructus Forsythiae	Octacosanedioic Acid	ANK2
455	Fructus Forsythiae	Octacosanedioic Acid	HSD17B2
456	Fructus Forsythiae	Octacosanedioic Acid	STIM2
457	Fructus Forsythiae	Octacosanedioic Acid	PKD2
458	Fructus Forsythiae	Octacosanedioic Acid	ALDH9A1
459	Fructus Forsythiae	Octacosanedioic Acid	TH
460	Fructus Forsythiae	Octacosanedioic Acid	EPO
461	Fructus Forsythiae	Octacosanedioic Acid	COLGALT1
462	Fructus Forsythiae	Octacosanedioic Acid	NEDD4
463	Fructus Forsythiae	Octacosanedioic Acid	CYP11A1
464	Fructus Forsythiae	Octacosanedioic Acid	DHODH
465	Fructus Forsythiae	Octacosanedioic Acid	CLN3
466	Fructus Forsythiae	Octacosanedioic Acid	ARID1A
467	Fructus Forsythiae	Octacosanedioic Acid	EGLN2
468	Fructus Forsythiae	Octacosanedioic Acid	ACAT1
469	Fructus Forsythiae	Octacosanedioic Acid	GALC
470	Fructus Forsythiae	Octacosanedioic Acid	PLCG2
471	Fructus Forsythiae	Octacosanedioic Acid	ACOT4
472	Fructus Forsythiae	Octacosanedioic Acid	PHGDH
473	Fructus Forsythiae	Octacosanedioic Acid	PNLIPRP2
474	Fructus Forsythiae	Octacosanedioic Acid	CYP39A1
475	Fructus Forsythiae	Octacosanedioic Acid	BCKDHA
476	Fructus Forsythiae	Octacosanedioic Acid	SLC25A12
477	Fructus Forsythiae	Octacosanedioic Acid	YBX3
478	Fructus Forsythiae	Octacosanedioic Acid	2022-03-08
479	Fructus Forsythiae	Octacosanedioic Acid	STIM1
480	Fructus Forsythiae	Octacosanedioic Acid	GAL3ST1
481	Fructus Forsythiae	Octacosanedioic Acid	CDH11
482	Fructus Forsythiae	Octacosanedioic Acid	CACNA1D
483	Fructus Forsythiae	Octacosanedioic Acid	DDC
484	Fructus Forsythiae	Octacosanedioic Acid	DHTKD1
485	Fructus Forsythiae	Octacosanedioic Acid	NEDD4L
486	Fructus Forsythiae	Octacosanedioic Acid	BDKRB2
487	Fructus Forsythiae	Octacosanedioic Acid	PRPH
488	Fructus Forsythiae	Octacosanedioic Acid	BCKDHB
489	Fructus Forsythiae	Octacosanedioic Acid	KCNE5
490	Fructus Forsythiae	Octacosanedioic Acid	SRD5A3
491	Fructus Forsythiae	Octacosanedioic Acid	SMAD7
492	Fructus Forsythiae	Octacosanedioic Acid	PRDM8
493	Fructus Forsythiae	Octacosanedioic Acid	UROD
494	Fructus Forsythiae	Octacosanedioic Acid	UGT8
495	Fructus Forsythiae	Octacosanedioic Acid	ETHE1
496	Fructus Forsythiae	Octacosanedioic Acid	WNT10B
497	Fructus Forsythiae	Octacosanedioic Acid	OGFOD1
498	Fructus Forsythiae	Octacosanedioic Acid	SLC38A7
499	Fructus Forsythiae	Octacosanedioic Acid	ACSS1
500	Fructus Forsythiae	Octacosanedioic Acid	CYP4B1
501	Fructus Forsythiae	Octacosanedioic Acid	STAR
502	Fructus Forsythiae	Octacosanedioic Acid	DLST
503	Fructus Forsythiae	Octacosanedioic Acid	PF4
504	Fructus Forsythiae	Octacosanedioic Acid	CRACR2A
505	Fructus Forsythiae	Octacosanedioic Acid	HSD17B1
506	Fructus Forsythiae	Octacosanedioic Acid	CAMK2D
507	Fructus Forsythiae	Octacosanedioic Acid	AP3D1
508	Fructus Forsythiae	Octacosanedioic Acid	MYO5A
509	Fructus Forsythiae	Octacosanedioic Acid	ILVBL
510	Fructus Forsythiae	Octacosanedioic Acid	CAV3
511	Fructus Forsythiae	Octacosanedioic Acid	HTT
512	Fructus Forsythiae	Octacosanedioic Acid	IL10
513	Fructus Forsythiae	Octacosanedioic Acid	EGLN3
514	Fructus Forsythiae	Octacosanedioic Acid	OGDHL
515	Fructus Forsythiae	Octacosanedioic Acid	KCNA5
516	Fructus Forsythiae	Octacosanedioic Acid	TST
517	Fructus Forsythiae	Octacosanedioic Acid	SLC1A6
518	Fructus Forsythiae	Octacosanedioic Acid	NPPA
519	Fructus Forsythiae	Octacosanedioic Acid	ACADM
520	Fructus Forsythiae	Octacosanedioic Acid	SQRDL
521	Fructus Forsythiae	Octacosanedioic Acid	TMEM110
522	Fructus Forsythiae	Octacosanedioic Acid	CDC42
523	Fructus Forsythiae	Octacosanedioic Acid	ARHGEF2
524	Fructus Forsythiae	Octacosanedioic Acid	EGLN1
525	Fructus Forsythiae	Octacosanedioic Acid	ETFDH
526	Fructus Forsythiae	Octacosanedioic Acid	EPHA4
527	Fructus Forsythiae	Octacosanedioic Acid	OCA2
528	Fructus Forsythiae	Octacosanedioic Acid	HSD17B8
529	Fructus Forsythiae	Octacosanedioic Acid	CTNNB1
530	Fructus Forsythiae	Octacosanedioic Acid	P4HA3
531	Fructus Forsythiae	Octacosanedioic Acid	EDA
532	Fructus Forsythiae	Octacosanedioic Acid	HACL1
533	Fructus Forsythiae	Octacosanedioic Acid	RYR2
534	Fructus Forsythiae	Octacosanedioic Acid	HAP1
535	Fructus Forsythiae	Octacosanedioic Acid	PCSK9
536	Fructus Forsythiae	Octacosanedioic Acid	KCNQ1
537	Fructus Forsythiae	Octacosanedioic Acid	CASQ2
538	Fructus Forsythiae	Octacosanedioic Acid	GJA5
539	Fructus Forsythiae	Octacosanedioic Acid	DHRS9
540	Fructus Forsythiae	Octacosanedioic Acid	GPR143
541	Fructus Forsythiae	Octacosanedioic Acid	UGT1A1
542	Fructus Forsythiae	Octacosanedioic Acid	DLD
543	Fructus Forsythiae	Octacosanedioic Acid	GNAS
544	Fructus Forsythiae	Octacosanedioic Acid	SLC25A13
545	Fructus Forsythiae	Octacosanedioic Acid	SFXN5
546	Fructus Forsythiae	Octacosanedioic Acid	PLOD2
547	Fructus Forsythiae	Octacosanedioic Acid	CYP1A1
548	Fructus Forsythiae	Octacosanedioic Acid	SULT2A1
549	Fructus Forsythiae	Octacosanedioic Acid	NFX1
550	Fructus Forsythiae	Octacosanedioic Acid	DBT
551	Fructus Forsythiae	Octacosanedioic Acid	SLC25A1
552	Fructus Forsythiae	Gamma-Camphorene	KCND1
553	Fructus Forsythiae	Gamma-Camphorene	KCNA3
554	Fructus Forsythiae	Gamma-Camphorene	PRKAB1
555	Fructus Forsythiae	Gamma-Camphorene	ADH1A
556	Fructus Forsythiae	Gamma-Camphorene	KCNA10
557	Fructus Forsythiae	Gamma-Camphorene	GAMT
558	Fructus Forsythiae	Gamma-Camphorene	KCNC3
559	Fructus Forsythiae	Gamma-Camphorene	KCNA1
560	Fructus Forsythiae	Gamma-Camphorene	KCNA2
561	Fructus Forsythiae	Gamma-Camphorene	TPO
562	Fructus Forsythiae	Gamma-Camphorene	CAT
563	Fructus Forsythiae	Gamma-Camphorene	KCNB1
564	Fructus Forsythiae	Gamma-Camphorene	ADH1B
565	Fructus Forsythiae	Gamma-Camphorene	DLG4
566	Fructus Forsythiae	Gamma-Camphorene	KCNC2
567	Fructus Forsythiae	Gamma-Camphorene	KCNC1
568	Fructus Forsythiae	Gamma-Camphorene	ADH1C
569	Fructus Forsythiae	Gamma-Camphorene	KCNB2
570	Fructus Forsythiae	Gamma-Camphorene	KCNA5
571	Fructus Forsythiae	Gamma-Camphorene	RNASE1
572	Fructus Forsythiae	Gamma-Camphorene	KCND2
573	Fructus Forsythiae	Gamma-Camphorene	ALDH2
574	Fructus Forsythiae	Gamma-Camphorene	KCNA4
575	Fructus Forsythiae	Gamma-Camphorene	KCNA7
576	Fructus Forsythiae	Gamma-Camphorene	KCNA6
577	Fructus Forsythiae	Gamma-Camphorene	KCND3
578	Fructus Forsythiae	Gamma-Camphorene	GUCY1B3
579	Fructus Forsythiae	Gamma-Camphorene	GATM
580	Fructus Forsythiae	Gamma-Camphorene	KCNK4
581	Fructus Forsythiae	Gamma-Camphorene	IYD
582	Fructus Forsythiae	Gamma-Camphorene	KCNQ1
583	Fructus Forsythiae	Gamma-Camphorene	CYP17A1
584	Fructus Forsythiae	Gamma-Camphorene	ESR1
585	Fructus Forsythiae	Gamma-Camphorene	PGR
586	Fructus Forsythiae	Gamma-Camphorene	OPRK1
587	Fructus Forsythiae	Gamma-Camphorene	NR3C2
588	Fructus Forsythiae	Gamma-Camphorene	FBP1
589	Fructus Forsythiae	Gamma-Camphorene	DGKI
590	Fructus Forsythiae	Gamma-Camphorene	ADH7
591	Fructus Forsythiae	Gamma-Camphorene	NFIB
592	Fructus Forsythiae	Gamma-Camphorene	CYGB
593	Fructus Forsythiae	Gamma-Camphorene	NRXN3
594	Fructus Forsythiae	Gamma-Camphorene	LRRC4B
595	Fructus Forsythiae	Gamma-Camphorene	AQP8
596	Fructus Forsythiae	Gamma-Camphorene	ARX
597	Fructus Forsythiae	Gamma-Camphorene	IGF1
598	Fructus Forsythiae	Gamma-Camphorene	SHANK3
599	Fructus Forsythiae	Gamma-Camphorene	ACY3
600	Fructus Forsythiae	Gamma-Camphorene	ASPA
601	Fructus Forsythiae	Gamma-Camphorene	NRXN1
602	Fructus Forsythiae	Gamma-Camphorene	EDN1
603	Fructus Forsythiae	Gamma-Camphorene	OXT
604	Fructus Forsythiae	Gamma-Camphorene	MAGI2
605	Fructus Forsythiae	Gamma-Camphorene	APOE
606	Fructus Forsythiae	Gamma-Camphorene	SOX15
607	Fructus Forsythiae	Gamma-Camphorene	CNTNAP4
608	Fructus Forsythiae	Gamma-Camphorene	RNASE4
609	Fructus Forsythiae	Gamma-Camphorene	RAB3A
610	Fructus Forsythiae	Gamma-Camphorene	MC4R
611	Fructus Forsythiae	Gamma-Camphorene	IL1B
612	Fructus Forsythiae	Gamma-Camphorene	GRIN2A
613	Fructus Forsythiae	Gamma-Camphorene	SLC17A7
614	Fructus Forsythiae	Gamma-Camphorene	CYP11A1
615	Fructus Forsythiae	Gamma-Camphorene	SCN5A
616	Fructus Forsythiae	Gamma-Camphorene	SCN10A
617	Fructus Forsythiae	Gamma-Camphorene	SPARC
618	Fructus Forsythiae	Gamma-Camphorene	SORCS3
619	Fructus Forsythiae	Gamma-Camphorene	RNASE8
620	Fructus Forsythiae	Gamma-Camphorene	KCNIP2
621	Fructus Forsythiae	Gamma-Camphorene	GPX7
622	Fructus Forsythiae	Gamma-Camphorene	CRLF1
623	Fructus Forsythiae	Gamma-Camphorene	FADD
624	Fructus Forsythiae	Gamma-Camphorene	SNTG2
625	Fructus Forsythiae	Gamma-Camphorene	SCGB1A1
626	Fructus Forsythiae	Gamma-Camphorene	OXTR
627	Fructus Forsythiae	Gamma-Camphorene	ALDH1B1
628	Fructus Forsythiae	Gamma-Camphorene	LEP
629	Fructus Forsythiae	Gamma-Camphorene	NLGN1
630	Fructus Forsythiae	Gamma-Camphorene	CACNA1D
631	Fructus Forsythiae	Gamma-Camphorene	RAPGEF2
632	Fructus Forsythiae	Gamma-Camphorene	DARS
633	Fructus Forsythiae	Gamma-Camphorene	ANK3
634	Fructus Forsythiae	Gamma-Camphorene	KCNE5
635	Fructus Forsythiae	Gamma-Camphorene	PPARD
636	Fructus Forsythiae	Gamma-Camphorene	NKX2-1
637	Fructus Forsythiae	Gamma-Camphorene	MIP
638	Fructus Forsythiae	Gamma-Camphorene	RYR3
639	Fructus Forsythiae	Gamma-Camphorene	ZPR1
640	Fructus Forsythiae	Gamma-Camphorene	ALDH3B1
641	Fructus Forsythiae	Gamma-Camphorene	NPPA
642	Fructus Forsythiae	Gamma-Camphorene	STX1A
643	Fructus Forsythiae	Gamma-Camphorene	PAXBP1
644	Fructus Forsythiae	Gamma-Camphorene	PAX7
645	Fructus Forsythiae	Gamma-Camphorene	ALDH3B2
646	Fructus Forsythiae	Gamma-Camphorene	RNASE2
647	Fructus Forsythiae	Gamma-Camphorene	NRXN2
648	Fructus Forsythiae	Gamma-Camphorene	ADORA1
649	Fructus Forsythiae	Gamma-Camphorene	ADH4
650	Fructus Forsythiae	Gamma-Camphorene	GJA5
651	Fructus Forsythiae	Gamma-Camphorene	FAS
652	Fructus Forsythiae	Gamma-Camphorene	DAB2IP
653	Fructus Forsythiae	Gamma-Camphorene	CYP2E1
654	Fructus Forsythiae	Gamma-Camphorene	ACY1
655	Fructus Forsythiae	Fortuneine	ADRA1A
656	Fructus Forsythiae	Fortuneine	HTR2A
657	Fructus Forsythiae	Fortuneine	CHRM3
658	Fructus Forsythiae	Fortuneine	CHRM1
659	Fructus Forsythiae	Fortuneine	HTR2B
660	Fructus Forsythiae	Fortuneine	ADRA2A
661	Fructus Forsythiae	Fortuneine	HTR6
662	Fructus Forsythiae	Fortuneine	SLC18A1
663	Fructus Forsythiae	Fortuneine	HTR2C
664	Fructus Forsythiae	Fortuneine	ADRA1D
665	Fructus Forsythiae	Fortuneine	DRD2
666	Fructus Forsythiae	Fortuneine	MAOA
667	Fructus Forsythiae	Fortuneine	CHRM5
668	Fructus Forsythiae	Fortuneine	SLC6A4
669	Fructus Forsythiae	Fortuneine	HRH4
670	Fructus Forsythiae	Fortuneine	HRH1
671	Fructus Forsythiae	Fortuneine	ACHE
672	Fructus Forsythiae	Fortuneine	KCNH2
673	Fructus Forsythiae	Fortuneine	SLC18A2
674	Fructus Forsythiae	Fortuneine	ACE
675	Fructus Forsythiae	Fortuneine	HRH2
676	Fructus Forsythiae	Fortuneine	HTR1A
677	Fructus Forsythiae	Fortuneine	ADRA1B
678	Fructus Forsythiae	Fortuneine	ADRA2C
679	Fructus Forsythiae	Fortuneine	DRD1
680	Fructus Forsythiae	Fortuneine	CHRM2
681	Fructus Forsythiae	Fortuneine	CHRM4
682	Fructus Forsythiae	Fortuneine	ADRA2B
683	Fructus Forsythiae	Fortuneine	SLC6A2
684	Fructus Forsythiae	Fortuneine	DNMT3A
685	Fructus Forsythiae	Fortuneine	SCT
686	Fructus Forsythiae	Fortuneine	PHKG2
687	Fructus Forsythiae	Fortuneine	APLP1
688	Fructus Forsythiae	Fortuneine	YWHAE
689	Fructus Forsythiae	Fortuneine	HTR1B
690	Fructus Forsythiae	Fortuneine	CHRNA7
691	Fructus Forsythiae	Fortuneine	CEND1
692	Fructus Forsythiae	Fortuneine	COLQ
693	Fructus Forsythiae	Fortuneine	CNR1
694	Fructus Forsythiae	Fortuneine	INS
695	Fructus Forsythiae	Fortuneine	SLC22A1
696	Fructus Forsythiae	Fortuneine	NPPA
697	Fructus Forsythiae	Fortuneine	DRD5
698	Fructus Forsythiae	Fortuneine	BCHE
699	Fructus Forsythiae	Fortuneine	CD34
700	Fructus Forsythiae	Fortuneine	CALCA
701	Fructus Forsythiae	Lactose	CXCR4
702	Fructus Forsythiae	Beta-Cymene	GABRB2
703	Fructus Forsythiae	Beta-Cymene	GABRB3
704	Fructus Forsythiae	Beta-Cymene	F2
705	Fructus Forsythiae	Beta-Cymene	GPR27
706	Fructus Forsythiae	Beta-Cymene	GABRA2
707	Fructus Forsythiae	Beta-Cymene	GABRD
708	Fructus Forsythiae	Beta-Cymene	GABRB1
709	Fructus Forsythiae	Beta-Cymene	GABRG3
710	Fructus Forsythiae	Beta-Cymene	GABRE
711	Fructus Forsythiae	Beta-Cymene	SCN2A
712	Fructus Forsythiae	Beta-Cymene	GABRA3
713	Fructus Forsythiae	Beta-Cymene	GABRG1
714	Fructus Forsythiae	Beta-Cymene	GABRP
715	Fructus Forsythiae	Beta-Cymene	GABRA4
716	Fructus Forsythiae	Beta-Cymene	SCN4A
717	Fructus Forsythiae	Beta-Cymene	GABRQ
718	Fructus Forsythiae	Beta-Cymene	GABRA5
719	Fructus Forsythiae	Beta-Cymene	GABRA6
720	Fructus Forsythiae	Beta-Cymene	GABRA1
721	Fructus Forsythiae	Beta-Cymene	GABRG2
722	Fructus Forsythiae	Beta-Cymene	CD36
723	Fructus Forsythiae	Beta-Cymene	SDC4
724	Fructus Forsythiae	Beta-Cymene	CD47
725	Fructus Forsythiae	Beta-Cymene	BICD1
726	Fructus Forsythiae	Ursolic Acid	AR
727	Fructus Forsythiae	Ursolic Acid	SRD5A1
728	Fructus Forsythiae	Ursolic Acid	CYP17A1
729	Fructus Forsythiae	Ursolic Acid	SLC8A1
730	Fructus Forsythiae	Ursolic Acid	F12
731	Fructus Forsythiae	Ursolic Acid	PRLR
732	Fructus Forsythiae	Ursolic Acid	ESR1
733	Fructus Forsythiae	Ursolic Acid	TRPV1
734	Fructus Forsythiae	Ursolic Acid	PPARG
735	Fructus Forsythiae	Ursolic Acid	PTGER1
736	Fructus Forsythiae	Ursolic Acid	FFAR1
737	Fructus Forsythiae	Ursolic Acid	PTGER4
738	Fructus Forsythiae	Ursolic Acid	PGR
739	Fructus Forsythiae	Ursolic Acid	NR3C1
740	Fructus Forsythiae	Ursolic Acid	OPRK1
741	Fructus Forsythiae	Ursolic Acid	FADS2
742	Fructus Forsythiae	Ursolic Acid	FADS1
743	Fructus Forsythiae	Ursolic Acid	PPARD
744	Fructus Forsythiae	Ursolic Acid	PTGER2
745	Fructus Forsythiae	Ursolic Acid	PTGS1
746	Fructus Forsythiae	Ursolic Acid	ACSL4
747	Fructus Forsythiae	Ursolic Acid	PTGER3
748	Fructus Forsythiae	Ursolic Acid	PTGS2
749	Fructus Forsythiae	Ursolic Acid	ELOVL4
750	Fructus Forsythiae	Ursolic Acid	ANXA1
751	Fructus Forsythiae	Ursolic Acid	ACSL3
752	Fructus Forsythiae	Ursolic Acid	NR3C2
753	Fructus Forsythiae	Ursolic Acid	ADRA1A
754	Fructus Forsythiae	Ursolic Acid	HTR2A
755	Fructus Forsythiae	Ursolic Acid	CHRM3
756	Fructus Forsythiae	Ursolic Acid	CHRM1
757	Fructus Forsythiae	Ursolic Acid	OPRD1
758	Fructus Forsythiae	Ursolic Acid	ADRA2A
759	Fructus Forsythiae	Ursolic Acid	SLC22A6
760	Fructus Forsythiae	Ursolic Acid	HTR2C
761	Fructus Forsythiae	Ursolic Acid	ADRA1D
762	Fructus Forsythiae	Ursolic Acid	DRD2
763	Fructus Forsythiae	Ursolic Acid	CHRM5
764	Fructus Forsythiae	Ursolic Acid	OPRM1
765	Fructus Forsythiae	Ursolic Acid	HRH1
766	Fructus Forsythiae	Ursolic Acid	ACE
767	Fructus Forsythiae	Ursolic Acid	HTR7
768	Fructus Forsythiae	Ursolic Acid	HTR1A
769	Fructus Forsythiae	Ursolic Acid	ADRA1B
770	Fructus Forsythiae	Ursolic Acid	ADRA2C
771	Fructus Forsythiae	Ursolic Acid	SLC15A1
772	Fructus Forsythiae	Ursolic Acid	SLC22A8
773	Fructus Forsythiae	Ursolic Acid	SLC22A7
774	Fructus Forsythiae	Ursolic Acid	DRD1
775	Fructus Forsythiae	Ursolic Acid	SLC22A11
776	Fructus Forsythiae	Ursolic Acid	ALB
777	Fructus Forsythiae	Ursolic Acid	CHRM2
778	Fructus Forsythiae	Ursolic Acid	CHRM4
779	Fructus Forsythiae	Ursolic Acid	SLC15A2
780	Fructus Forsythiae	Ursolic Acid	ADRA2B
781	Fructus Forsythiae	Ursolic Acid	SLC6A2
782	Fructus Forsythiae	Ursolic Acid	ESRRG
783	Fructus Forsythiae	Ursolic Acid	COX6C
784	Fructus Forsythiae	Ursolic Acid	COX5B
785	Fructus Forsythiae	Ursolic Acid	COX7C
786	Fructus Forsythiae	Ursolic Acid	COX1
787	Fructus Forsythiae	Ursolic Acid	AKR1C2
788	Fructus Forsythiae	Ursolic Acid	ADH1B
789	Fructus Forsythiae	Ursolic Acid	COX5A
790	Fructus Forsythiae	Ursolic Acid	COX3
791	Fructus Forsythiae	Ursolic Acid	COX7A1
792	Fructus Forsythiae	Ursolic Acid	FECH
793	Fructus Forsythiae	Ursolic Acid	COX4I1
794	Fructus Forsythiae	Ursolic Acid	PLA2G1B
795	Fructus Forsythiae	Ursolic Acid	AKR1C1
796	Fructus Forsythiae	Ursolic Acid	COX6A2
797	Fructus Forsythiae	Ursolic Acid	HMGCR
798	Fructus Forsythiae	Ursolic Acid	ADH1C
799	Fructus Forsythiae	Ursolic Acid	COX6B1
800	Fructus Forsythiae	Ursolic Acid	FABP6
801	Fructus Forsythiae	Ursolic Acid	CES1
802	Fructus Forsythiae	Ursolic Acid	COX7B
803	Fructus Forsythiae	Ursolic Acid	COX2
804	Fructus Forsythiae	Ursolic Acid	COX8A
805	Fructus Forsythiae	Ursolic Acid	NR1H4
806	Fructus Forsythiae	Campherenol	VDR
807	Fructus Forsythiae	Campherenol	CYP27B1
808	Fructus Forsythiae	Campherenol	GC
809	Fructus Forsythiae	Campherenol	SNW1
810	Fructus Forsythiae	Campherenol	F12
811	Fructus Forsythiae	Campherenol	ESR1
812	Fructus Forsythiae	Campherenol	PGR
813	Fructus Forsythiae	Campherenol	NFKB1
814	Fructus Forsythiae	Campherenol	AKR1C3
815	Fructus Forsythiae	Campherenol	CYP24A1
816	Fructus Forsythiae	Campherenol	GPBAR1
817	Fructus Forsythiae	Campherenol	SNAI2
818	Fructus Forsythiae	Campherenol	MED1
819	Fructus Forsythiae	Campherenol	SNAI1
820	Fructus Forsythiae	Campherenol	CYP3A4
821	Fructus Forsythiae	Campherenol	CALB1
822	Fructus Forsythiae	Campherenol	FGF23
823	Fructus Forsythiae	Campherenol	GFI1
824	Fructus Forsythiae	Campherenol	LANCL2
825	Fructus Forsythiae	Campherenol	WNT4
826	Fructus Forsythiae	Campherenol	TCF3
827	Fructus Forsythiae	Campherenol	BAX
828	Fructus Forsythiae	Campherenol	KL
829	Fructus Forsythiae	Campherenol	CYP2R1
830	Fructus Forsythiae	Campherenol	PML
831	Fructus Forsythiae	Campherenol	B4GALT1
832	Fructus Forsythiae	Campherenol	S100G
833	Fructus Forsythiae	Campherenol	CYP27A1
834	Fructus Forsythiae	Campherenol	KANK2
835	Fructus Forsythiae	Campherenol	IRX5
836	Fructus Forsythiae	Campherenol	RXRA
837	Fructus Forsythiae	Campherenol	NR1H4
838	Fructus Forsythiae	Campherenol	TRIM24
839	Fructus Forsythiae	(E)-Citral	ACHE
840	Fructus Forsythiae	(E)-Citral	BCHE
841	Fructus Forsythiae	(E)-Citral	COLQ
842	Fructus Forsythiae	(E)-Citral	SLC5A7
843	Fructus Forsythiae	(E)-Citral	NRG1
844	Fructus Forsythiae	(E)-Citral	DMGDH
845	Fructus Forsythiae	(E)-Citral	SIX3
846	Fructus Forsythiae	(E)-Citral	CRP
847	Fructus Forsythiae	(E)-Citral	PRSS12
848	Fructus Forsythiae	(E)-Citral	SLC44A4
849	Fructus Forsythiae	(E)-Citral	ALDH7A1
850	Fructus Forsythiae	(E)-Citral	DNM3
851	Fructus Forsythiae	(E)-Citral	ASCL1
852	Fructus Forsythiae	(E)-Citral	ENPP6
853	Fructus Forsythiae	(E)-Citral	CDH8
854	Fructus Forsythiae	(E)-Citral	FNTA
855	Fructus Forsythiae	(E)-Citral	AGRN
856	Fructus Forsythiae	(E)-Citral	CHKA
857	Fructus Forsythiae	(E)-Citral	CHDH
858	Fructus Forsythiae	(E)-Citral	GRIN1
859	Fructus Forsythiae	Terpinen-4-Ol	ESR1
860	Fructus Forsythiae	Terpinen-4-Ol	PGR
861	Fructus Forsythiae	Terpinen-4-Ol	WNT4
862	Fructus Forsythiae	Terpinen-4-Ol	AR
863	Fructus Forsythiae	Terpinen-4-Ol	NR3C1
864	Fructus Forsythiae	Terpinen-4-Ol	VDR
865	Fructus Forsythiae	Terpinen-4-Ol	TFAP2C
866	Fructus Forsythiae	Terpinen-4-Ol	TNFSF11
867	Fructus Forsythiae	Terpinen-4-Ol	PHB
868	Fructus Forsythiae	Terpinen-4-Ol	TOX3
869	Fructus Forsythiae	Terpinen-4-Ol	TGFB1
870	Fructus Forsythiae	Terpinen-4-Ol	MED1
871	Fructus Forsythiae	Terpinen-4-Ol	NKX3-1
872	Fructus Forsythiae	Terpinen-4-Ol	ESR2
873	Fructus Forsythiae	Terpinen-4-Ol	NEDD4
874	Fructus Forsythiae	Terpinen-4-Ol	SHH
875	Fructus Forsythiae	Terpinen-4-Ol	SERPINB3
876	Fructus Forsythiae	Terpinen-4-Ol	LEF1
877	Fructus Forsythiae	Terpinen-4-Ol	FGFR2
878	Fructus Forsythiae	Terpinen-4-Ol	SRC
879	Fructus Forsythiae	Terpinen-4-Ol	UBR5
880	Fructus Forsythiae	Terpinen-4-Ol	AREG
881	Fructus Forsythiae	Terpinen-4-Ol	CD34
882	Fructus Forsythiae	Terpinen-4-Ol	GPER1
883	Fructus Forsythiae	Terpinen-4-Ol	WNT5A
884	Fructus Forsythiae	Terpinen-4-Ol	SOX9
885	Fructus Forsythiae	Terpinen-4-Ol	PDGFB
886	Fructus Forsythiae	Terpinen-4-Ol	TRIM24
887	Fructus Forsythiae	Delta-Terpineol	ESR1
888	Fructus Forsythiae	Delta-Terpineol	PGR
889	Fructus Forsythiae	Delta-Terpineol	WNT4
890	Fructus Forsythiae	Delta-Terpineol	TRPV3
891	Fructus Forsythiae	Delta-Terpineol	OPRK1
892	Fructus Forsythiae	Delta-Terpineol	TRPM8
893	Fructus Forsythiae	Delta-Terpineol	TRPA1
894	Fructus Forsythiae	Delta-Terpineol	TFAP2C
895	Fructus Forsythiae	Delta-Terpineol	TNFSF11
896	Fructus Forsythiae	Delta-Terpineol	PHB
897	Fructus Forsythiae	Delta-Terpineol	TOX3
898	Fructus Forsythiae	Delta-Terpineol	TGFB1
899	Fructus Forsythiae	Delta-Terpineol	MED1
900	Fructus Forsythiae	Delta-Terpineol	NKX3-1
901	Fructus Forsythiae	Delta-Terpineol	ESR2
902	Fructus Forsythiae	Delta-Terpineol	NEDD4
903	Fructus Forsythiae	Delta-Terpineol	SHH
904	Fructus Forsythiae	Delta-Terpineol	SERPINB3
905	Fructus Forsythiae	Delta-Terpineol	LEF1
906	Fructus Forsythiae	Delta-Terpineol	FGFR2
907	Fructus Forsythiae	Delta-Terpineol	SRC
908	Fructus Forsythiae	Delta-Terpineol	UBR5
909	Fructus Forsythiae	Delta-Terpineol	AREG
910	Fructus Forsythiae	Delta-Terpineol	CD34
911	Fructus Forsythiae	Delta-Terpineol	GPER1
912	Fructus Forsythiae	Delta-Terpineol	WNT5A
913	Fructus Forsythiae	Delta-Terpineol	SOX9
914	Fructus Forsythiae	Delta-Terpineol	PDGFB
915	Fructus Forsythiae	Delta-Terpineol	VDR
916	Fructus Forsythiae	Delta-Terpineol	TRIM24
917	Fructus Forsythiae	Beta-Pinene	KCND1
918	Fructus Forsythiae	Beta-Pinene	KCNA3
919	Fructus Forsythiae	Beta-Pinene	PRKAB1
920	Fructus Forsythiae	Beta-Pinene	ADH1A
921	Fructus Forsythiae	Beta-Pinene	KCNA10
922	Fructus Forsythiae	Beta-Pinene	GAMT
923	Fructus Forsythiae	Beta-Pinene	KCNC3
924	Fructus Forsythiae	Beta-Pinene	KCNA1
925	Fructus Forsythiae	Beta-Pinene	KCNA2
926	Fructus Forsythiae	Beta-Pinene	TPO
927	Fructus Forsythiae	Beta-Pinene	CAT
928	Fructus Forsythiae	Beta-Pinene	KCNB1
929	Fructus Forsythiae	Beta-Pinene	ADH1B
930	Fructus Forsythiae	Beta-Pinene	DLG4
931	Fructus Forsythiae	Beta-Pinene	KCNC2
932	Fructus Forsythiae	Beta-Pinene	KCNC1
933	Fructus Forsythiae	Beta-Pinene	ADH1C
934	Fructus Forsythiae	Beta-Pinene	KCNB2
935	Fructus Forsythiae	Beta-Pinene	KCNA5
936	Fructus Forsythiae	Beta-Pinene	RNASE1
937	Fructus Forsythiae	Beta-Pinene	KCND2
938	Fructus Forsythiae	Beta-Pinene	ALDH2
939	Fructus Forsythiae	Beta-Pinene	KCNA4
940	Fructus Forsythiae	Beta-Pinene	KCNA7
941	Fructus Forsythiae	Beta-Pinene	KCNA6
942	Fructus Forsythiae	Beta-Pinene	KCND3
943	Fructus Forsythiae	Beta-Pinene	GUCY1B3
944	Fructus Forsythiae	Beta-Pinene	GATM
945	Fructus Forsythiae	Beta-Pinene	KCNK4
946	Fructus Forsythiae	Beta-Pinene	IYD
947	Fructus Forsythiae	Beta-Pinene	KCNQ1
948	Fructus Forsythiae	Beta-Pinene	FBP1
949	Fructus Forsythiae	Beta-Pinene	DGKI
950	Fructus Forsythiae	Beta-Pinene	ADH7
951	Fructus Forsythiae	Beta-Pinene	NFIB
952	Fructus Forsythiae	Beta-Pinene	CYGB
953	Fructus Forsythiae	Beta-Pinene	NRXN3
954	Fructus Forsythiae	Beta-Pinene	LRRC4B
955	Fructus Forsythiae	Beta-Pinene	AQP8
956	Fructus Forsythiae	Beta-Pinene	ARX
957	Fructus Forsythiae	Beta-Pinene	IGF1
958	Fructus Forsythiae	Beta-Pinene	SHANK3
959	Fructus Forsythiae	Beta-Pinene	ACY3
960	Fructus Forsythiae	Beta-Pinene	ASPA
961	Fructus Forsythiae	Beta-Pinene	NRXN1
962	Fructus Forsythiae	Beta-Pinene	EDN1
963	Fructus Forsythiae	Beta-Pinene	OXT
964	Fructus Forsythiae	Beta-Pinene	MAGI2
965	Fructus Forsythiae	Beta-Pinene	APOE
966	Fructus Forsythiae	Beta-Pinene	SOX15
967	Fructus Forsythiae	Beta-Pinene	CNTNAP4
968	Fructus Forsythiae	Beta-Pinene	RNASE4
969	Fructus Forsythiae	Beta-Pinene	RAB3A
970	Fructus Forsythiae	Beta-Pinene	MC4R
971	Fructus Forsythiae	Beta-Pinene	IL1B
972	Fructus Forsythiae	Beta-Pinene	GRIN2A
973	Fructus Forsythiae	Beta-Pinene	SLC17A7
974	Fructus Forsythiae	Beta-Pinene	CYP11A1
975	Fructus Forsythiae	Beta-Pinene	SCN5A
976	Fructus Forsythiae	Beta-Pinene	SCN10A
977	Fructus Forsythiae	Beta-Pinene	SPARC
978	Fructus Forsythiae	Beta-Pinene	SORCS3
979	Fructus Forsythiae	Beta-Pinene	RNASE8
980	Fructus Forsythiae	Beta-Pinene	KCNIP2
981	Fructus Forsythiae	Beta-Pinene	GPX7
982	Fructus Forsythiae	Beta-Pinene	CRLF1
983	Fructus Forsythiae	Beta-Pinene	FADD
984	Fructus Forsythiae	Beta-Pinene	SNTG2
985	Fructus Forsythiae	Beta-Pinene	SCGB1A1
986	Fructus Forsythiae	Beta-Pinene	OXTR
987	Fructus Forsythiae	Beta-Pinene	ALDH1B1
988	Fructus Forsythiae	Beta-Pinene	LEP
989	Fructus Forsythiae	Beta-Pinene	NLGN1
990	Fructus Forsythiae	Beta-Pinene	CACNA1D
991	Fructus Forsythiae	Beta-Pinene	RAPGEF2
992	Fructus Forsythiae	Beta-Pinene	DARS
993	Fructus Forsythiae	Beta-Pinene	ANK3
994	Fructus Forsythiae	Beta-Pinene	KCNE5
995	Fructus Forsythiae	Beta-Pinene	PPARD
996	Fructus Forsythiae	Beta-Pinene	NKX2-1
997	Fructus Forsythiae	Beta-Pinene	MIP
998	Fructus Forsythiae	Beta-Pinene	RYR3
999	Fructus Forsythiae	Beta-Pinene	ZPR1
1000	Fructus Forsythiae	Beta-Pinene	ALDH3B1
1001	Fructus Forsythiae	Beta-Pinene	NPPA
1002	Fructus Forsythiae	Beta-Pinene	STX1A
1003	Fructus Forsythiae	Beta-Pinene	PAXBP1
1004	Fructus Forsythiae	Beta-Pinene	PAX7
1005	Fructus Forsythiae	Beta-Pinene	ALDH3B2
1006	Fructus Forsythiae	Beta-Pinene	RNASE2
1007	Fructus Forsythiae	Beta-Pinene	NRXN2
1008	Fructus Forsythiae	Beta-Pinene	ADORA1
1009	Fructus Forsythiae	Beta-Pinene	ADH4
1010	Fructus Forsythiae	Beta-Pinene	GJA5
1011	Fructus Forsythiae	Beta-Pinene	FAS
1012	Fructus Forsythiae	Beta-Pinene	DAB2IP
1013	Fructus Forsythiae	Beta-Pinene	CYP2E1
1014	Fructus Forsythiae	Beta-Pinene	ACY1
1015	Fructus Forsythiae	Camphor	ESRRG
1016	Fructus Forsythiae	Camphor	COX6C
1017	Fructus Forsythiae	Camphor	COX5B
1018	Fructus Forsythiae	Camphor	COX7C
1019	Fructus Forsythiae	Camphor	COX1
1020	Fructus Forsythiae	Camphor	AKR1C2
1021	Fructus Forsythiae	Camphor	COX5A
1022	Fructus Forsythiae	Camphor	COX3
1023	Fructus Forsythiae	Camphor	AR
1024	Fructus Forsythiae	Camphor	COX7A1
1025	Fructus Forsythiae	Camphor	FECH
1026	Fructus Forsythiae	Camphor	COX4I1
1027	Fructus Forsythiae	Camphor	PLA2G1B
1028	Fructus Forsythiae	Camphor	COX6A2
1029	Fructus Forsythiae	Camphor	ADH1C
1030	Fructus Forsythiae	Camphor	COX6B1
1031	Fructus Forsythiae	Camphor	FABP6
1032	Fructus Forsythiae	Camphor	CES1
1033	Fructus Forsythiae	Camphor	COX7B
1034	Fructus Forsythiae	Camphor	COX2
1035	Fructus Forsythiae	Camphor	COX8A
1036	Fructus Forsythiae	Camphor	NR1H4
1037	Fructus Forsythiae	Oleanolic Acid	AR
1038	Fructus Forsythiae	Oleanolic Acid	SRD5A1
1039	Fructus Forsythiae	Oleanolic Acid	CYP17A1
1040	Fructus Forsythiae	Oleanolic Acid	SLC8A1
1041	Fructus Forsythiae	Oleanolic Acid	F12
1042	Fructus Forsythiae	Oleanolic Acid	PRLR
1043	Fructus Forsythiae	Oleanolic Acid	ESR1
1044	Fructus Forsythiae	Oleanolic Acid	TRPV1
1045	Fructus Forsythiae	Oleanolic Acid	PPARG
1046	Fructus Forsythiae	Oleanolic Acid	PTGER1
1047	Fructus Forsythiae	Oleanolic Acid	FFAR1
1048	Fructus Forsythiae	Oleanolic Acid	PTGER4
1049	Fructus Forsythiae	Oleanolic Acid	PGR
1050	Fructus Forsythiae	Oleanolic Acid	NR3C1
1051	Fructus Forsythiae	Oleanolic Acid	OPRK1
1052	Fructus Forsythiae	Oleanolic Acid	FADS2
1053	Fructus Forsythiae	Oleanolic Acid	FADS1
1054	Fructus Forsythiae	Oleanolic Acid	PPARD
1055	Fructus Forsythiae	Oleanolic Acid	PTGER2
1056	Fructus Forsythiae	Oleanolic Acid	PTGS1
1057	Fructus Forsythiae	Oleanolic Acid	ACSL4
1058	Fructus Forsythiae	Oleanolic Acid	PTGER3
1059	Fructus Forsythiae	Oleanolic Acid	PTGS2
1060	Fructus Forsythiae	Oleanolic Acid	ELOVL4
1061	Fructus Forsythiae	Oleanolic Acid	ANXA1
1062	Fructus Forsythiae	Oleanolic Acid	ACSL3
1063	Fructus Forsythiae	Oleanolic Acid	NR3C2
1064	Fructus Forsythiae	Oleanolic Acid	ESRRG
1065	Fructus Forsythiae	Oleanolic Acid	COX6C
1066	Fructus Forsythiae	Oleanolic Acid	COX5B
1067	Fructus Forsythiae	Oleanolic Acid	COX7C
1068	Fructus Forsythiae	Oleanolic Acid	COX1
1069	Fructus Forsythiae	Oleanolic Acid	AKR1C2
1070	Fructus Forsythiae	Oleanolic Acid	ADH1B
1071	Fructus Forsythiae	Oleanolic Acid	COX5A
1072	Fructus Forsythiae	Oleanolic Acid	COX3
1073	Fructus Forsythiae	Oleanolic Acid	COX7A1
1074	Fructus Forsythiae	Oleanolic Acid	FECH
1075	Fructus Forsythiae	Oleanolic Acid	COX4I1
1076	Fructus Forsythiae	Oleanolic Acid	PLA2G1B
1077	Fructus Forsythiae	Oleanolic Acid	AKR1C1
1078	Fructus Forsythiae	Oleanolic Acid	COX6A2
1079	Fructus Forsythiae	Oleanolic Acid	HMGCR
1080	Fructus Forsythiae	Oleanolic Acid	ADH1C
1081	Fructus Forsythiae	Oleanolic Acid	COX6B1
1082	Fructus Forsythiae	Oleanolic Acid	FABP6
1083	Fructus Forsythiae	Oleanolic Acid	CES1
1084	Fructus Forsythiae	Oleanolic Acid	COX7B
1085	Fructus Forsythiae	Oleanolic Acid	COX2
1086	Fructus Forsythiae	Oleanolic Acid	COX8A
1087	Fructus Forsythiae	Oleanolic Acid	NR1H4
1088	Fructus Forsythiae	Lactucasterol	AR
1089	Fructus Forsythiae	Lactucasterol	NR3C1
1090	Fructus Forsythiae	Lactucasterol	ATP1A1
1091	Fructus Forsythiae	Lactucasterol	NOTCH2
1092	Fructus Forsythiae	Lactucasterol	SRD5A1
1093	Fructus Forsythiae	Lactucasterol	CYP17A1
1094	Fructus Forsythiae	Lactucasterol	PRLR
1095	Fructus Forsythiae	Lactucasterol	ESR1
1096	Fructus Forsythiae	Lactucasterol	PTGER1
1097	Fructus Forsythiae	Lactucasterol	PTGER4
1098	Fructus Forsythiae	Lactucasterol	PGR
1099	Fructus Forsythiae	Lactucasterol	OPRK1
1100	Fructus Forsythiae	Lactucasterol	PTGER2
1101	Fructus Forsythiae	Lactucasterol	PTGER3
1102	Fructus Forsythiae	Lactucasterol	HSD11B1
1103	Fructus Forsythiae	Lactucasterol	ANXA1
1104	Fructus Forsythiae	Lactucasterol	NR3C2
1105	Fructus Forsythiae	Lactucasterol	CAMLG
1106	Fructus Forsythiae	Lactucasterol	ATP1A3
1107	Fructus Forsythiae	Lactucasterol	PPP3R2
1108	Fructus Forsythiae	Lactucasterol	PPIA
1109	Fructus Forsythiae	Lactucasterol	ATP1A2
1110	Fructus Forsythiae	Lactucasterol	PPIF
1111	Fructus Forsythiae	Lactucasterol	COL5A1
1112	Fructus Forsythiae	Lactucasterol	NOX1
1113	Fructus Forsythiae	Lactucasterol	CREBRF
1114	Fructus Forsythiae	Lactucasterol	NKX3-1
1115	Fructus Forsythiae	Lactucasterol	BMP2
1116	Fructus Forsythiae	Lactucasterol	SHBG
1117	Fructus Forsythiae	Lactucasterol	ATP1B1
1118	Fructus Forsythiae	Lactucasterol	WNT4
1119	Fructus Forsythiae	Lactucasterol	TGFB2
1120	Fructus Forsythiae	Lactucasterol	DKK3
1121	Fructus Forsythiae	Lactucasterol	NR1I3
1122	Fructus Forsythiae	Lactucasterol	ALDH1A1
1123	Fructus Forsythiae	Lactucasterol	FXYD2
1124	Fructus Forsythiae	Lactucasterol	TSPO
1125	Fructus Forsythiae	Lactucasterol	BMP5
1126	Fructus Forsythiae	Lactucasterol	PDE8B
1127	Fructus Forsythiae	Lactucasterol	S100A9
1128	Fructus Forsythiae	Lactucasterol	AKAP13
1129	Fructus Forsythiae	Lactucasterol	RAD51
1130	Fructus Forsythiae	Lactucasterol	REST
1131	Fructus Forsythiae	Myricadiol	ESR1
1132	Fructus Forsythiae	Myricadiol	PGR
1133	Fructus Forsythiae	Myricadiol	AR
1134	Fructus Forsythiae	Myricadiol	NR3C1
1135	Fructus Forsythiae	Myricadiol	ANXA1
1136	Fructus Forsythiae	Myricadiol	VDR
1137	Fructus Forsythiae	Rengyol	TRPV3
1138	Fructus Forsythiae	Rengyol	OPRK1
1139	Fructus Forsythiae	Rengyol	TRPM8
1140	Fructus Forsythiae	Rengyol	TRPA1
1141	Fructus Forsythiae	Linalool	ESR1
1142	Fructus Forsythiae	Linalool	PGR
1143	Fructus Forsythiae	Linalool	WNT4
1144	Fructus Forsythiae	Linalool	TFAP2C
1145	Fructus Forsythiae	Linalool	TNFSF11
1146	Fructus Forsythiae	Linalool	PHB
1147	Fructus Forsythiae	Linalool	TOX3
1148	Fructus Forsythiae	Linalool	TGFB1
1149	Fructus Forsythiae	Linalool	MED1
1150	Fructus Forsythiae	Linalool	NKX3-1
1151	Fructus Forsythiae	Linalool	ESR2
1152	Fructus Forsythiae	Linalool	NEDD4
1153	Fructus Forsythiae	Linalool	SHH
1154	Fructus Forsythiae	Linalool	SERPINB3
1155	Fructus Forsythiae	Linalool	LEF1
1156	Fructus Forsythiae	Linalool	FGFR2
1157	Fructus Forsythiae	Linalool	SRC
1158	Fructus Forsythiae	Linalool	UBR5
1159	Fructus Forsythiae	Linalool	AREG
1160	Fructus Forsythiae	Linalool	CD34
1161	Fructus Forsythiae	Linalool	GPER1
1162	Fructus Forsythiae	Linalool	WNT5A
1163	Fructus Forsythiae	Linalool	SOX9
1164	Fructus Forsythiae	Linalool	PDGFB
1165	Fructus Forsythiae	Linalool	VDR
1166	Fructus Forsythiae	Linalool	TRIM24
1167	Fructus Forsythiae	Ursolicacid	SRD5A1
1168	Fructus Forsythiae	Ursolicacid	CYP17A1
1169	Fructus Forsythiae	Ursolicacid	SLC8A1
1170	Fructus Forsythiae	Ursolicacid	F12
1171	Fructus Forsythiae	Ursolicacid	PRLR
1172	Fructus Forsythiae	Ursolicacid	ESR1
1173	Fructus Forsythiae	Ursolicacid	TRPV1
1174	Fructus Forsythiae	Ursolicacid	PTGER1
1175	Fructus Forsythiae	Ursolicacid	PTGER4
1176	Fructus Forsythiae	Ursolicacid	PGR
1177	Fructus Forsythiae	Ursolicacid	AR
1178	Fructus Forsythiae	Ursolicacid	NR3C1
1179	Fructus Forsythiae	Ursolicacid	OPRK1
1180	Fructus Forsythiae	Ursolicacid	FADS2
1181	Fructus Forsythiae	Ursolicacid	FADS1
1182	Fructus Forsythiae	Ursolicacid	PTGER2
1183	Fructus Forsythiae	Ursolicacid	PTGS1
1184	Fructus Forsythiae	Ursolicacid	PTGER3
1185	Fructus Forsythiae	Ursolicacid	PTGS2
1186	Fructus Forsythiae	Ursolicacid	ELOVL4
1187	Fructus Forsythiae	Ursolicacid	ANXA1
1188	Fructus Forsythiae	Ursolicacid	NR3C2
1189	Fructus Forsythiae	Ursolicacid	ESRRG
1190	Fructus Forsythiae	Ursolicacid	COX6C
1191	Fructus Forsythiae	Ursolicacid	COX5B
1192	Fructus Forsythiae	Ursolicacid	COX7C
1193	Fructus Forsythiae	Ursolicacid	COX1
1194	Fructus Forsythiae	Ursolicacid	AKR1C2
1195	Fructus Forsythiae	Ursolicacid	ADH1B
1196	Fructus Forsythiae	Ursolicacid	COX5A
1197	Fructus Forsythiae	Ursolicacid	COX3
1198	Fructus Forsythiae	Ursolicacid	COX7A1
1199	Fructus Forsythiae	Ursolicacid	FECH
1200	Fructus Forsythiae	Ursolicacid	COX4I1
1201	Fructus Forsythiae	Ursolicacid	PLA2G1B
1202	Fructus Forsythiae	Ursolicacid	AKR1C1
1203	Fructus Forsythiae	Ursolicacid	COX6A2
1204	Fructus Forsythiae	Ursolicacid	HMGCR
1205	Fructus Forsythiae	Ursolicacid	ADH1C
1206	Fructus Forsythiae	Ursolicacid	COX6B1
1207	Fructus Forsythiae	Ursolicacid	FABP6
1208	Fructus Forsythiae	Ursolicacid	CES1
1209	Fructus Forsythiae	Ursolicacid	COX7B
1210	Fructus Forsythiae	Ursolicacid	COX2
1211	Fructus Forsythiae	Ursolicacid	COX8A
1212	Fructus Forsythiae	Ursolicacid	NR1H4
1213	Fructus Forsythiae	Myrcene	KCND1
1214	Fructus Forsythiae	Myrcene	KCNA3
1215	Fructus Forsythiae	Myrcene	PRKAB1
1216	Fructus Forsythiae	Myrcene	ADH1A
1217	Fructus Forsythiae	Myrcene	KCNA10
1218	Fructus Forsythiae	Myrcene	GAMT
1219	Fructus Forsythiae	Myrcene	KCNC3
1220	Fructus Forsythiae	Myrcene	KCNA1
1221	Fructus Forsythiae	Myrcene	KCNA2
1222	Fructus Forsythiae	Myrcene	TPO
1223	Fructus Forsythiae	Myrcene	CAT
1224	Fructus Forsythiae	Myrcene	KCNB1
1225	Fructus Forsythiae	Myrcene	ADH1B
1226	Fructus Forsythiae	Myrcene	DLG4
1227	Fructus Forsythiae	Myrcene	KCNC2
1228	Fructus Forsythiae	Myrcene	KCNC1
1229	Fructus Forsythiae	Myrcene	ADH1C
1230	Fructus Forsythiae	Myrcene	KCNB2
1231	Fructus Forsythiae	Myrcene	KCNA5
1232	Fructus Forsythiae	Myrcene	RNASE1
1233	Fructus Forsythiae	Myrcene	KCND2
1234	Fructus Forsythiae	Myrcene	ALDH2
1235	Fructus Forsythiae	Myrcene	KCNA4
1236	Fructus Forsythiae	Myrcene	KCNA7
1237	Fructus Forsythiae	Myrcene	KCNA6
1238	Fructus Forsythiae	Myrcene	KCND3
1239	Fructus Forsythiae	Myrcene	GUCY1B3
1240	Fructus Forsythiae	Myrcene	GATM
1241	Fructus Forsythiae	Myrcene	KCNK4
1242	Fructus Forsythiae	Myrcene	IYD
1243	Fructus Forsythiae	Myrcene	KCNQ1
1244	Fructus Forsythiae	Myrcene	FBP1
1245	Fructus Forsythiae	Myrcene	DGKI
1246	Fructus Forsythiae	Myrcene	ADH7
1247	Fructus Forsythiae	Myrcene	NFIB
1248	Fructus Forsythiae	Myrcene	CYGB
1249	Fructus Forsythiae	Myrcene	NRXN3
1250	Fructus Forsythiae	Myrcene	LRRC4B
1251	Fructus Forsythiae	Myrcene	AQP8
1252	Fructus Forsythiae	Myrcene	ARX
1253	Fructus Forsythiae	Myrcene	IGF1
1254	Fructus Forsythiae	Myrcene	SHANK3
1255	Fructus Forsythiae	Myrcene	ACY3
1256	Fructus Forsythiae	Myrcene	ASPA
1257	Fructus Forsythiae	Myrcene	NRXN1
1258	Fructus Forsythiae	Myrcene	EDN1
1259	Fructus Forsythiae	Myrcene	OXT
1260	Fructus Forsythiae	Myrcene	MAGI2
1261	Fructus Forsythiae	Myrcene	APOE
1262	Fructus Forsythiae	Myrcene	SOX15
1263	Fructus Forsythiae	Myrcene	CNTNAP4
1264	Fructus Forsythiae	Myrcene	RNASE4
1265	Fructus Forsythiae	Myrcene	RAB3A
1266	Fructus Forsythiae	Myrcene	MC4R
1267	Fructus Forsythiae	Myrcene	IL1B
1268	Fructus Forsythiae	Myrcene	GRIN2A
1269	Fructus Forsythiae	Myrcene	SLC17A7
1270	Fructus Forsythiae	Myrcene	CYP11A1
1271	Fructus Forsythiae	Myrcene	SCN5A
1272	Fructus Forsythiae	Myrcene	SCN10A
1273	Fructus Forsythiae	Myrcene	SPARC
1274	Fructus Forsythiae	Myrcene	SORCS3
1275	Fructus Forsythiae	Myrcene	RNASE8
1276	Fructus Forsythiae	Myrcene	KCNIP2
1277	Fructus Forsythiae	Myrcene	GPX7
1278	Fructus Forsythiae	Myrcene	CRLF1
1279	Fructus Forsythiae	Myrcene	FADD
1280	Fructus Forsythiae	Myrcene	SNTG2
1281	Fructus Forsythiae	Myrcene	SCGB1A1
1282	Fructus Forsythiae	Myrcene	OXTR
1283	Fructus Forsythiae	Myrcene	ALDH1B1
1284	Fructus Forsythiae	Myrcene	LEP
1285	Fructus Forsythiae	Myrcene	NLGN1
1286	Fructus Forsythiae	Myrcene	CACNA1D
1287	Fructus Forsythiae	Myrcene	RAPGEF2
1288	Fructus Forsythiae	Myrcene	DARS
1289	Fructus Forsythiae	Myrcene	ANK3
1290	Fructus Forsythiae	Myrcene	KCNE5
1291	Fructus Forsythiae	Myrcene	PPARD
1292	Fructus Forsythiae	Myrcene	NKX2-1
1293	Fructus Forsythiae	Myrcene	MIP
1294	Fructus Forsythiae	Myrcene	RYR3
1295	Fructus Forsythiae	Myrcene	ZPR1
1296	Fructus Forsythiae	Myrcene	ALDH3B1
1297	Fructus Forsythiae	Myrcene	NPPA
1298	Fructus Forsythiae	Myrcene	STX1A
1299	Fructus Forsythiae	Myrcene	PAXBP1
1300	Fructus Forsythiae	Myrcene	PAX7
1301	Fructus Forsythiae	Myrcene	ALDH3B2
1302	Fructus Forsythiae	Myrcene	RNASE2
1303	Fructus Forsythiae	Myrcene	NRXN2
1304	Fructus Forsythiae	Myrcene	ADORA1
1305	Fructus Forsythiae	Myrcene	ADH4
1306	Fructus Forsythiae	Myrcene	GJA5
1307	Fructus Forsythiae	Myrcene	FAS
1308	Fructus Forsythiae	Myrcene	DAB2IP
1309	Fructus Forsythiae	Myrcene	CYP2E1
1310	Fructus Forsythiae	Myrcene	ACY1
1311	Fructus Forsythiae	Alpha-Limonene	KCND1
1312	Fructus Forsythiae	Alpha-Limonene	KCNA3
1313	Fructus Forsythiae	Alpha-Limonene	PRKAB1
1314	Fructus Forsythiae	Alpha-Limonene	ADH1A
1315	Fructus Forsythiae	Alpha-Limonene	KCNA10
1316	Fructus Forsythiae	Alpha-Limonene	GAMT
1317	Fructus Forsythiae	Alpha-Limonene	KCNC3
1318	Fructus Forsythiae	Alpha-Limonene	KCNA1
1319	Fructus Forsythiae	Alpha-Limonene	KCNA2
1320	Fructus Forsythiae	Alpha-Limonene	TPO
1321	Fructus Forsythiae	Alpha-Limonene	CAT
1322	Fructus Forsythiae	Alpha-Limonene	KCNB1
1323	Fructus Forsythiae	Alpha-Limonene	ADH1B
1324	Fructus Forsythiae	Alpha-Limonene	DLG4
1325	Fructus Forsythiae	Alpha-Limonene	KCNC2
1326	Fructus Forsythiae	Alpha-Limonene	KCNC1
1327	Fructus Forsythiae	Alpha-Limonene	ADH1C
1328	Fructus Forsythiae	Alpha-Limonene	KCNB2
1329	Fructus Forsythiae	Alpha-Limonene	KCNA5
1330	Fructus Forsythiae	Alpha-Limonene	RNASE1
1331	Fructus Forsythiae	Alpha-Limonene	KCND2
1332	Fructus Forsythiae	Alpha-Limonene	ALDH2
1333	Fructus Forsythiae	Alpha-Limonene	KCNA4
1334	Fructus Forsythiae	Alpha-Limonene	KCNA7
1335	Fructus Forsythiae	Alpha-Limonene	KCNA6
1336	Fructus Forsythiae	Alpha-Limonene	KCND3
1337	Fructus Forsythiae	Alpha-Limonene	GUCY1B3
1338	Fructus Forsythiae	Alpha-Limonene	GATM
1339	Fructus Forsythiae	Alpha-Limonene	KCNK4
1340	Fructus Forsythiae	Alpha-Limonene	IYD
1341	Fructus Forsythiae	Alpha-Limonene	KCNQ1
1342	Fructus Forsythiae	Alpha-Limonene	CYP17A1
1343	Fructus Forsythiae	Alpha-Limonene	ESR1
1344	Fructus Forsythiae	Alpha-Limonene	PGR
1345	Fructus Forsythiae	Alpha-Limonene	OPRK1
1346	Fructus Forsythiae	Alpha-Limonene	NR3C2
1347	Fructus Forsythiae	Alpha-Limonene	FBP1
1348	Fructus Forsythiae	Alpha-Limonene	DGKI
1349	Fructus Forsythiae	Alpha-Limonene	ADH7
1350	Fructus Forsythiae	Alpha-Limonene	NFIB
1351	Fructus Forsythiae	Alpha-Limonene	CYGB
1352	Fructus Forsythiae	Alpha-Limonene	NRXN3
1353	Fructus Forsythiae	Alpha-Limonene	LRRC4B
1354	Fructus Forsythiae	Alpha-Limonene	AQP8
1355	Fructus Forsythiae	Alpha-Limonene	ARX
1356	Fructus Forsythiae	Alpha-Limonene	IGF1
1357	Fructus Forsythiae	Alpha-Limonene	SHANK3
1358	Fructus Forsythiae	Alpha-Limonene	ACY3
1359	Fructus Forsythiae	Alpha-Limonene	ASPA
1360	Fructus Forsythiae	Alpha-Limonene	NRXN1
1361	Fructus Forsythiae	Alpha-Limonene	EDN1
1362	Fructus Forsythiae	Alpha-Limonene	OXT
1363	Fructus Forsythiae	Alpha-Limonene	MAGI2
1364	Fructus Forsythiae	Alpha-Limonene	APOE
1365	Fructus Forsythiae	Alpha-Limonene	SOX15
1366	Fructus Forsythiae	Alpha-Limonene	CNTNAP4
1367	Fructus Forsythiae	Alpha-Limonene	RNASE4
1368	Fructus Forsythiae	Alpha-Limonene	RAB3A
1369	Fructus Forsythiae	Alpha-Limonene	MC4R
1370	Fructus Forsythiae	Alpha-Limonene	IL1B
1371	Fructus Forsythiae	Alpha-Limonene	GRIN2A
1372	Fructus Forsythiae	Alpha-Limonene	SLC17A7
1373	Fructus Forsythiae	Alpha-Limonene	CYP11A1
1374	Fructus Forsythiae	Alpha-Limonene	SCN5A
1375	Fructus Forsythiae	Alpha-Limonene	SCN10A
1376	Fructus Forsythiae	Alpha-Limonene	SPARC
1377	Fructus Forsythiae	Alpha-Limonene	SORCS3
1378	Fructus Forsythiae	Alpha-Limonene	RNASE8
1379	Fructus Forsythiae	Alpha-Limonene	KCNIP2
1380	Fructus Forsythiae	Alpha-Limonene	GPX7
1381	Fructus Forsythiae	Alpha-Limonene	CRLF1
1382	Fructus Forsythiae	Alpha-Limonene	FADD
1383	Fructus Forsythiae	Alpha-Limonene	SNTG2
1384	Fructus Forsythiae	Alpha-Limonene	SCGB1A1
1385	Fructus Forsythiae	Alpha-Limonene	OXTR
1386	Fructus Forsythiae	Alpha-Limonene	ALDH1B1
1387	Fructus Forsythiae	Alpha-Limonene	LEP
1388	Fructus Forsythiae	Alpha-Limonene	NLGN1
1389	Fructus Forsythiae	Alpha-Limonene	CACNA1D
1390	Fructus Forsythiae	Alpha-Limonene	RAPGEF2
1391	Fructus Forsythiae	Alpha-Limonene	DARS
1392	Fructus Forsythiae	Alpha-Limonene	ANK3
1393	Fructus Forsythiae	Alpha-Limonene	KCNE5
1394	Fructus Forsythiae	Alpha-Limonene	PPARD
1395	Fructus Forsythiae	Alpha-Limonene	NKX2-1
1396	Fructus Forsythiae	Alpha-Limonene	MIP
1397	Fructus Forsythiae	Alpha-Limonene	RYR3
1398	Fructus Forsythiae	Alpha-Limonene	ZPR1
1399	Fructus Forsythiae	Alpha-Limonene	ALDH3B1
1400	Fructus Forsythiae	Alpha-Limonene	NPPA
1401	Fructus Forsythiae	Alpha-Limonene	STX1A
1402	Fructus Forsythiae	Alpha-Limonene	PAXBP1
1403	Fructus Forsythiae	Alpha-Limonene	PAX7
1404	Fructus Forsythiae	Alpha-Limonene	ALDH3B2
1405	Fructus Forsythiae	Alpha-Limonene	RNASE2
1406	Fructus Forsythiae	Alpha-Limonene	NRXN2
1407	Fructus Forsythiae	Alpha-Limonene	ADORA1
1408	Fructus Forsythiae	Alpha-Limonene	ADH4
1409	Fructus Forsythiae	Alpha-Limonene	GJA5
1410	Fructus Forsythiae	Alpha-Limonene	FAS
1411	Fructus Forsythiae	Alpha-Limonene	DAB2IP
1412	Fructus Forsythiae	Alpha-Limonene	CYP2E1
1413	Fructus Forsythiae	Alpha-Limonene	ACY1
1414	Fructus Forsythiae	Pinoresinol	SEC14L3
1415	Fructus Forsythiae	Pinoresinol	PPP2CA
1416	Fructus Forsythiae	Pinoresinol	PRKCA
1417	Fructus Forsythiae	Pinoresinol	NR1I2
1418	Fructus Forsythiae	Pinoresinol	ALOX5
1419	Fructus Forsythiae	Pinoresinol	PPP2CB
1420	Fructus Forsythiae	Pinoresinol	SEC14L2
1421	Fructus Forsythiae	Pinoresinol	DGKA
1422	Fructus Forsythiae	Pinoresinol	PRKCB
1423	Fructus Forsythiae	Pinoresinol	SEC14L4

## Sheet: S2
Table S2 The ingredients and corresponding active targets of cortex phellodendri
Num	Herbs	compound	target genes (gene symbol)
1	Phellodendri chinensis Cortex	7-Dehydrostigmasterol	VDR
2	Phellodendri chinensis Cortex	7-Dehydrostigmasterol	CYP27B1
3	Phellodendri chinensis Cortex	7-Dehydrostigmasterol	GC
4	Phellodendri chinensis Cortex	7-Dehydrostigmasterol	SNW1
5	Phellodendri chinensis Cortex	7-Dehydrostigmasterol	F12
6	Phellodendri chinensis Cortex	7-Dehydrostigmasterol	ESR1
7	Phellodendri chinensis Cortex	7-Dehydrostigmasterol	PGR
8	Phellodendri chinensis Cortex	7-Dehydrostigmasterol	NFKB1
9	Phellodendri chinensis Cortex	7-Dehydrostigmasterol	AKR1C3
10	Phellodendri chinensis Cortex	7-Dehydrostigmasterol	CYP24A1
11	Phellodendri chinensis Cortex	7-Dehydrostigmasterol	GPBAR1
12	Phellodendri chinensis Cortex	7-Dehydrostigmasterol	SNAI2
13	Phellodendri chinensis Cortex	7-Dehydrostigmasterol	MED1
14	Phellodendri chinensis Cortex	7-Dehydrostigmasterol	SNAI1
15	Phellodendri chinensis Cortex	7-Dehydrostigmasterol	CYP3A4
16	Phellodendri chinensis Cortex	7-Dehydrostigmasterol	CALB1
17	Phellodendri chinensis Cortex	7-Dehydrostigmasterol	FGF23
18	Phellodendri chinensis Cortex	7-Dehydrostigmasterol	GFI1
19	Phellodendri chinensis Cortex	7-Dehydrostigmasterol	LANCL2
20	Phellodendri chinensis Cortex	7-Dehydrostigmasterol	WNT4
21	Phellodendri chinensis Cortex	7-Dehydrostigmasterol	TCF3
22	Phellodendri chinensis Cortex	7-Dehydrostigmasterol	BAX
23	Phellodendri chinensis Cortex	7-Dehydrostigmasterol	KL
24	Phellodendri chinensis Cortex	7-Dehydrostigmasterol	CYP2R1
25	Phellodendri chinensis Cortex	7-Dehydrostigmasterol	PML
26	Phellodendri chinensis Cortex	7-Dehydrostigmasterol	B4GALT1
27	Phellodendri chinensis Cortex	7-Dehydrostigmasterol	S100G
28	Phellodendri chinensis Cortex	7-Dehydrostigmasterol	CYP27A1
29	Phellodendri chinensis Cortex	7-Dehydrostigmasterol	KANK2
30	Phellodendri chinensis Cortex	7-Dehydrostigmasterol	IRX5
31	Phellodendri chinensis Cortex	7-Dehydrostigmasterol	RXRA
32	Phellodendri chinensis Cortex	7-Dehydrostigmasterol	NR1H4
33	Phellodendri chinensis Cortex	7-Dehydrostigmasterol	TRIM24
34	Phellodendri chinensis Cortex	Magnoflorine	HTR2A
35	Phellodendri chinensis Cortex	Magnoflorine	HTR2B
36	Phellodendri chinensis Cortex	Magnoflorine	ADRA2A
37	Phellodendri chinensis Cortex	Magnoflorine	HTR1B
38	Phellodendri chinensis Cortex	Magnoflorine	HTR2C
39	Phellodendri chinensis Cortex	Magnoflorine	HTR1D
40	Phellodendri chinensis Cortex	Magnoflorine	DRD2
41	Phellodendri chinensis Cortex	Magnoflorine	DRD4
42	Phellodendri chinensis Cortex	Magnoflorine	HTR1A
43	Phellodendri chinensis Cortex	Magnoflorine	ADRA2C
44	Phellodendri chinensis Cortex	Magnoflorine	CALY
45	Phellodendri chinensis Cortex	Magnoflorine	DRD3
46	Phellodendri chinensis Cortex	Magnoflorine	DRD5
47	Phellodendri chinensis Cortex	Magnoflorine	DRD1
48	Phellodendri chinensis Cortex	Magnoflorine	ADRA2B
49	Phellodendri chinensis Cortex	Columbamine	TYR
50	Phellodendri chinensis Cortex	Columbamine	DCT
51	Phellodendri chinensis Cortex	Columbamine	TYRP1
52	Phellodendri chinensis Cortex	Columbamine	SEC14L3
53	Phellodendri chinensis Cortex	Columbamine	PPP2CA
54	Phellodendri chinensis Cortex	Columbamine	PRKCA
55	Phellodendri chinensis Cortex	Columbamine	NR1I2
56	Phellodendri chinensis Cortex	Columbamine	ALOX5
57	Phellodendri chinensis Cortex	Columbamine	PPP2CB
58	Phellodendri chinensis Cortex	Columbamine	SEC14L2
59	Phellodendri chinensis Cortex	Columbamine	DGKA
60	Phellodendri chinensis Cortex	Columbamine	PRKCB
61	Phellodendri chinensis Cortex	Columbamine	SEC14L4
62	Phellodendri chinensis Cortex	Columbamine	AP3D1
63	Phellodendri chinensis Cortex	Columbamine	OCA2
64	Phellodendri chinensis Cortex	Columbamine	GPR143
65	Phellodendri chinensis Cortex	Menisporphine	GGCX
66	Phellodendri chinensis Cortex	Menisporphine	PTGS1
67	Phellodendri chinensis Cortex	Menisporphine	PTGS2
68	Phellodendri chinensis Cortex	Menisporphine	SERPINB7
69	Phellodendri chinensis Cortex	Menisporphine	PDE3A
70	Phellodendri chinensis Cortex	Menisporphine	NDRG2
71	Phellodendri chinensis Cortex	Menisporphine	NAMPT
72	Phellodendri chinensis Cortex	Menisporphine	RGCC
73	Phellodendri chinensis Cortex	Menisporphine	FNDC5
74	Phellodendri chinensis Cortex	Menisporphine	AVPR1A
75	Phellodendri chinensis Cortex	Menisporphine	METRNL
76	Phellodendri chinensis Cortex	Menisporphine	MAPK9
77	Phellodendri chinensis Cortex	Menisporphine	PTGIS
78	Phellodendri chinensis Cortex	Menisporphine	HEG1
79	Phellodendri chinensis Cortex	Menisporphine	AVP
80	Phellodendri chinensis Cortex	Menisporphine	SLC6A4
81	Phellodendri chinensis Cortex	Menisporphine	BDKRB2
82	Phellodendri chinensis Cortex	Menisporphine	NEUROD2
83	Phellodendri chinensis Cortex	Menisporphine	INS
84	Phellodendri chinensis Cortex	Menisporphine	ANAPC2
85	Phellodendri chinensis Cortex	Menisporphine	WNT11
86	Phellodendri chinensis Cortex	Menisporphine	ALOX15B
87	Phellodendri chinensis Cortex	Menisporphine	CDC20
88	Phellodendri chinensis Cortex	Menisporphine	NAPRT
89	Phellodendri chinensis Cortex	Menisporphine	MECOM
90	Phellodendri chinensis Cortex	Menisporphine	SNCA
91	Phellodendri chinensis Cortex	Menisporphine	CPLX2
92	Phellodendri chinensis Cortex	Menisporphine	ALOX15
93	Phellodendri chinensis Cortex	Menisporphine	ANXA1
94	Phellodendri chinensis Cortex	Menisporphine	PRDM16
95	Phellodendri chinensis Cortex	Menisporphine	CCM2L
96	Phellodendri chinensis Cortex	Phellodendrine	HTR2A
97	Phellodendri chinensis Cortex	Phellodendrine	CHRM3
98	Phellodendri chinensis Cortex	Phellodendrine	HTR2B
99	Phellodendri chinensis Cortex	Phellodendrine	ADRA2A
100	Phellodendri chinensis Cortex	Phellodendrine	HTR1B
101	Phellodendri chinensis Cortex	Phellodendrine	HTR2C
102	Phellodendri chinensis Cortex	Phellodendrine	HTR1D
103	Phellodendri chinensis Cortex	Phellodendrine	DRD2
104	Phellodendri chinensis Cortex	Phellodendrine	ACHE
105	Phellodendri chinensis Cortex	Phellodendrine	SLC18A2
106	Phellodendri chinensis Cortex	Phellodendrine	DRD4
107	Phellodendri chinensis Cortex	Phellodendrine	CHRNA2
108	Phellodendri chinensis Cortex	Phellodendrine	HTR1A
109	Phellodendri chinensis Cortex	Phellodendrine	ADRA2C
110	Phellodendri chinensis Cortex	Phellodendrine	CALY
111	Phellodendri chinensis Cortex	Phellodendrine	DRD3
112	Phellodendri chinensis Cortex	Phellodendrine	DRD5
113	Phellodendri chinensis Cortex	Phellodendrine	HTR3A
114	Phellodendri chinensis Cortex	Phellodendrine	DRD1
115	Phellodendri chinensis Cortex	Phellodendrine	BCHE
116	Phellodendri chinensis Cortex	Phellodendrine	CHRM2
117	Phellodendri chinensis Cortex	Phellodendrine	ADRA2B
118	Phellodendri chinensis Cortex	Candletoxin A	PRKCA
119	Phellodendri chinensis Cortex	Candletoxin A	PRKCD
120	Phellodendri chinensis Cortex	Candletoxin A	NR3C1
121	Phellodendri chinensis Cortex	Candletoxin A	NOTCH2
122	Phellodendri chinensis Cortex	Palmatine	PDE10A
123	Phellodendri chinensis Cortex	Palmatine	PDE4B
124	Phellodendri chinensis Cortex	Palmatine	PDE4D
125	Phellodendri chinensis Cortex	Palmatine	PDE5A
126	Phellodendri chinensis Cortex	Palmatine	PDE9A
127	Phellodendri chinensis Cortex	Palmatine	PDE1B
128	Phellodendri chinensis Cortex	Palmatine	PLN
129	Phellodendri chinensis Cortex	Palmatine	HRC
130	Phellodendri chinensis Cortex	Palmatine	CAMK2D
131	Phellodendri chinensis Cortex	Palmatine	PDE2A
132	Phellodendri chinensis Cortex	Palmatine	CAMK2G
133	Phellodendri chinensis Cortex	Palmatine	PDE11A
134	Phellodendri chinensis Cortex	Phellamurin	SOAT1
135	Phellodendri chinensis Cortex	Phellamurin	MTTP
136	Phellodendri chinensis Cortex	Phellamurin	SOAT2
137	Phellodendri chinensis Cortex	Hericenone H	SOAT1
138	Phellodendri chinensis Cortex	Hericenone H	MTTP
139	Phellodendri chinensis Cortex	Hericenone H	CNR2
140	Phellodendri chinensis Cortex	Hericenone H	CNR1
141	Phellodendri chinensis Cortex	Hericenone H	SOAT2
142	Phellodendri chinensis Cortex	Alpha-Phellandrene	KCND1
143	Phellodendri chinensis Cortex	Alpha-Phellandrene	KCNA3
144	Phellodendri chinensis Cortex	Alpha-Phellandrene	PRKAB1
145	Phellodendri chinensis Cortex	Alpha-Phellandrene	ADH1A
146	Phellodendri chinensis Cortex	Alpha-Phellandrene	KCNA10
147	Phellodendri chinensis Cortex	Alpha-Phellandrene	GAMT
148	Phellodendri chinensis Cortex	Alpha-Phellandrene	KCNC3
149	Phellodendri chinensis Cortex	Alpha-Phellandrene	KCNA1
150	Phellodendri chinensis Cortex	Alpha-Phellandrene	KCNA2
151	Phellodendri chinensis Cortex	Alpha-Phellandrene	TPO
152	Phellodendri chinensis Cortex	Alpha-Phellandrene	CAT
153	Phellodendri chinensis Cortex	Alpha-Phellandrene	KCNB1
154	Phellodendri chinensis Cortex	Alpha-Phellandrene	ADH1B
155	Phellodendri chinensis Cortex	Alpha-Phellandrene	DLG4
156	Phellodendri chinensis Cortex	Alpha-Phellandrene	KCNC2
157	Phellodendri chinensis Cortex	Alpha-Phellandrene	KCNC1
158	Phellodendri chinensis Cortex	Alpha-Phellandrene	ADH1C
159	Phellodendri chinensis Cortex	Alpha-Phellandrene	KCNB2
160	Phellodendri chinensis Cortex	Alpha-Phellandrene	KCNA5
161	Phellodendri chinensis Cortex	Alpha-Phellandrene	RNASE1
162	Phellodendri chinensis Cortex	Alpha-Phellandrene	KCND2
163	Phellodendri chinensis Cortex	Alpha-Phellandrene	ALDH2
164	Phellodendri chinensis Cortex	Alpha-Phellandrene	KCNA4
165	Phellodendri chinensis Cortex	Alpha-Phellandrene	KCNA7
166	Phellodendri chinensis Cortex	Alpha-Phellandrene	KCNA6
167	Phellodendri chinensis Cortex	Alpha-Phellandrene	KCND3
168	Phellodendri chinensis Cortex	Alpha-Phellandrene	GUCY1B3
169	Phellodendri chinensis Cortex	Alpha-Phellandrene	GATM
170	Phellodendri chinensis Cortex	Alpha-Phellandrene	KCNK4
171	Phellodendri chinensis Cortex	Alpha-Phellandrene	IYD
172	Phellodendri chinensis Cortex	Alpha-Phellandrene	KCNQ1
173	Phellodendri chinensis Cortex	Alpha-Phellandrene	FBP1
174	Phellodendri chinensis Cortex	Alpha-Phellandrene	DGKI
175	Phellodendri chinensis Cortex	Alpha-Phellandrene	ADH7
176	Phellodendri chinensis Cortex	Alpha-Phellandrene	NFIB
177	Phellodendri chinensis Cortex	Alpha-Phellandrene	CYGB
178	Phellodendri chinensis Cortex	Alpha-Phellandrene	NRXN3
179	Phellodendri chinensis Cortex	Alpha-Phellandrene	LRRC4B
180	Phellodendri chinensis Cortex	Alpha-Phellandrene	AQP8
181	Phellodendri chinensis Cortex	Alpha-Phellandrene	ARX
182	Phellodendri chinensis Cortex	Alpha-Phellandrene	IGF1
183	Phellodendri chinensis Cortex	Alpha-Phellandrene	SHANK3
184	Phellodendri chinensis Cortex	Alpha-Phellandrene	ACY3
185	Phellodendri chinensis Cortex	Alpha-Phellandrene	ASPA
186	Phellodendri chinensis Cortex	Alpha-Phellandrene	NRXN1
187	Phellodendri chinensis Cortex	Alpha-Phellandrene	EDN1
188	Phellodendri chinensis Cortex	Alpha-Phellandrene	OXT
189	Phellodendri chinensis Cortex	Alpha-Phellandrene	MAGI2
190	Phellodendri chinensis Cortex	Alpha-Phellandrene	APOE
191	Phellodendri chinensis Cortex	Alpha-Phellandrene	SOX15
192	Phellodendri chinensis Cortex	Alpha-Phellandrene	CNTNAP4
193	Phellodendri chinensis Cortex	Alpha-Phellandrene	RNASE4
194	Phellodendri chinensis Cortex	Alpha-Phellandrene	RAB3A
195	Phellodendri chinensis Cortex	Alpha-Phellandrene	MC4R
196	Phellodendri chinensis Cortex	Alpha-Phellandrene	IL1B
197	Phellodendri chinensis Cortex	Alpha-Phellandrene	GRIN2A
198	Phellodendri chinensis Cortex	Alpha-Phellandrene	SLC17A7
199	Phellodendri chinensis Cortex	Alpha-Phellandrene	CYP11A1
200	Phellodendri chinensis Cortex	Alpha-Phellandrene	SCN5A
201	Phellodendri chinensis Cortex	Alpha-Phellandrene	SCN10A
202	Phellodendri chinensis Cortex	Alpha-Phellandrene	SPARC
203	Phellodendri chinensis Cortex	Alpha-Phellandrene	SORCS3
204	Phellodendri chinensis Cortex	Alpha-Phellandrene	RNASE8
205	Phellodendri chinensis Cortex	Alpha-Phellandrene	KCNIP2
206	Phellodendri chinensis Cortex	Alpha-Phellandrene	GPX7
207	Phellodendri chinensis Cortex	Alpha-Phellandrene	CRLF1
208	Phellodendri chinensis Cortex	Alpha-Phellandrene	FADD
209	Phellodendri chinensis Cortex	Alpha-Phellandrene	SNTG2
210	Phellodendri chinensis Cortex	Alpha-Phellandrene	SCGB1A1
211	Phellodendri chinensis Cortex	Alpha-Phellandrene	OXTR
212	Phellodendri chinensis Cortex	Alpha-Phellandrene	ALDH1B1
213	Phellodendri chinensis Cortex	Alpha-Phellandrene	LEP
214	Phellodendri chinensis Cortex	Alpha-Phellandrene	NLGN1
215	Phellodendri chinensis Cortex	Alpha-Phellandrene	CACNA1D
216	Phellodendri chinensis Cortex	Alpha-Phellandrene	RAPGEF2
217	Phellodendri chinensis Cortex	Alpha-Phellandrene	DARS
218	Phellodendri chinensis Cortex	Alpha-Phellandrene	ANK3
219	Phellodendri chinensis Cortex	Alpha-Phellandrene	KCNE5
220	Phellodendri chinensis Cortex	Alpha-Phellandrene	PPARD
221	Phellodendri chinensis Cortex	Alpha-Phellandrene	NKX2-1
222	Phellodendri chinensis Cortex	Alpha-Phellandrene	MIP
223	Phellodendri chinensis Cortex	Alpha-Phellandrene	RYR3
224	Phellodendri chinensis Cortex	Alpha-Phellandrene	ZPR1
225	Phellodendri chinensis Cortex	Alpha-Phellandrene	ALDH3B1
226	Phellodendri chinensis Cortex	Alpha-Phellandrene	NPPA
227	Phellodendri chinensis Cortex	Alpha-Phellandrene	STX1A
228	Phellodendri chinensis Cortex	Alpha-Phellandrene	PAXBP1
229	Phellodendri chinensis Cortex	Alpha-Phellandrene	PAX7
230	Phellodendri chinensis Cortex	Alpha-Phellandrene	ALDH3B2
231	Phellodendri chinensis Cortex	Alpha-Phellandrene	RNASE2
232	Phellodendri chinensis Cortex	Alpha-Phellandrene	NRXN2
233	Phellodendri chinensis Cortex	Alpha-Phellandrene	ADORA1
234	Phellodendri chinensis Cortex	Alpha-Phellandrene	ADH4
235	Phellodendri chinensis Cortex	Alpha-Phellandrene	GJA5
236	Phellodendri chinensis Cortex	Alpha-Phellandrene	FAS
237	Phellodendri chinensis Cortex	Alpha-Phellandrene	DAB2IP
238	Phellodendri chinensis Cortex	Alpha-Phellandrene	CYP2E1
239	Phellodendri chinensis Cortex	Alpha-Phellandrene	ACY1
240	Phellodendri chinensis Cortex	Thalifendine	PDE5A
241	Phellodendri chinensis Cortex	Thalifendine	PDE11A
242	Phellodendri chinensis Cortex	Obacunone	NR3C2
243	Phellodendri chinensis Cortex	Phellavin	SOAT1
244	Phellodendri chinensis Cortex	Phellavin	MTTP
245	Phellodendri chinensis Cortex	Phellavin	SOAT2
246	Phellodendri chinensis Cortex	Gamma-Sitosterol	ESR1
247	Phellodendri chinensis Cortex	Gamma-Sitosterol	PGR
248	Phellodendri chinensis Cortex	Gamma-Sitosterol	VDR
249	Phellodendri chinensis Cortex	Gamma-Sitosterol	CYP27B1
250	Phellodendri chinensis Cortex	Gamma-Sitosterol	GC
251	Phellodendri chinensis Cortex	Gamma-Sitosterol	SNW1
252	Phellodendri chinensis Cortex	Gamma-Sitosterol	AR
253	Phellodendri chinensis Cortex	Gamma-Sitosterol	NR3C1
254	Phellodendri chinensis Cortex	Gamma-Sitosterol	NFKB1
255	Phellodendri chinensis Cortex	Gamma-Sitosterol	AKR1C3
256	Phellodendri chinensis Cortex	Gamma-Sitosterol	CYP24A1
257	Phellodendri chinensis Cortex	Gamma-Sitosterol	GPBAR1
258	Phellodendri chinensis Cortex	Gamma-Sitosterol	SNAI2
259	Phellodendri chinensis Cortex	Gamma-Sitosterol	MED1
260	Phellodendri chinensis Cortex	Gamma-Sitosterol	SNAI1
261	Phellodendri chinensis Cortex	Gamma-Sitosterol	CYP3A4
262	Phellodendri chinensis Cortex	Gamma-Sitosterol	CALB1
263	Phellodendri chinensis Cortex	Gamma-Sitosterol	FGF23
264	Phellodendri chinensis Cortex	Gamma-Sitosterol	GFI1
265	Phellodendri chinensis Cortex	Gamma-Sitosterol	LANCL2
266	Phellodendri chinensis Cortex	Gamma-Sitosterol	WNT4
267	Phellodendri chinensis Cortex	Gamma-Sitosterol	TCF3
268	Phellodendri chinensis Cortex	Gamma-Sitosterol	BAX
269	Phellodendri chinensis Cortex	Gamma-Sitosterol	KL
270	Phellodendri chinensis Cortex	Gamma-Sitosterol	CYP2R1
271	Phellodendri chinensis Cortex	Gamma-Sitosterol	PML
272	Phellodendri chinensis Cortex	Gamma-Sitosterol	B4GALT1
273	Phellodendri chinensis Cortex	Gamma-Sitosterol	S100G
274	Phellodendri chinensis Cortex	Gamma-Sitosterol	CYP27A1
275	Phellodendri chinensis Cortex	Gamma-Sitosterol	KANK2
276	Phellodendri chinensis Cortex	Gamma-Sitosterol	IRX5
277	Phellodendri chinensis Cortex	Gamma-Sitosterol	RXRA
278	Phellodendri chinensis Cortex	Gamma-Sitosterol	NR1H4
279	Phellodendri chinensis Cortex	Gamma-Sitosterol	TRIM24
280	Phellodendri chinensis Cortex	Phenethylamine	SLC6A3
281	Phellodendri chinensis Cortex	Phenethylamine	GPT2
282	Phellodendri chinensis Cortex	Phenethylamine	ABAT
283	Phellodendri chinensis Cortex	Phenethylamine	ADRA1A
284	Phellodendri chinensis Cortex	Phenethylamine	ADRB2
285	Phellodendri chinensis Cortex	Phenethylamine	ADRA2A
286	Phellodendri chinensis Cortex	Phenethylamine	MAOB
287	Phellodendri chinensis Cortex	Phenethylamine	ADRB1
288	Phellodendri chinensis Cortex	Phenethylamine	SLC18A1
289	Phellodendri chinensis Cortex	Phenethylamine	ADRA1D
290	Phellodendri chinensis Cortex	Phenethylamine	DRD2
291	Phellodendri chinensis Cortex	Phenethylamine	MAOA
292	Phellodendri chinensis Cortex	Phenethylamine	SLC6A4
293	Phellodendri chinensis Cortex	Phenethylamine	SLC18A2
294	Phellodendri chinensis Cortex	Phenethylamine	GPT
295	Phellodendri chinensis Cortex	Phenethylamine	ADRA1B
296	Phellodendri chinensis Cortex	Phenethylamine	ADRA2C
297	Phellodendri chinensis Cortex	Phenethylamine	AOC3
298	Phellodendri chinensis Cortex	Phenethylamine	ADRB3
299	Phellodendri chinensis Cortex	Phenethylamine	TAAR1
300	Phellodendri chinensis Cortex	Phenethylamine	CARTPT
301	Phellodendri chinensis Cortex	Phenethylamine	ADRA2B
302	Phellodendri chinensis Cortex	Phenethylamine	SLC6A2
303	Phellodendri chinensis Cortex	Menisperine	HTR2A
304	Phellodendri chinensis Cortex	Menisperine	HTR2B
305	Phellodendri chinensis Cortex	Menisperine	ADRA2A
306	Phellodendri chinensis Cortex	Menisperine	HTR1B
307	Phellodendri chinensis Cortex	Menisperine	HTR2C
308	Phellodendri chinensis Cortex	Menisperine	HTR1D
309	Phellodendri chinensis Cortex	Menisperine	DRD2
310	Phellodendri chinensis Cortex	Menisperine	DRD4
311	Phellodendri chinensis Cortex	Menisperine	HTR1A
312	Phellodendri chinensis Cortex	Menisperine	ADRA2C
313	Phellodendri chinensis Cortex	Menisperine	CALY
314	Phellodendri chinensis Cortex	Menisperine	DRD3
315	Phellodendri chinensis Cortex	Menisperine	DRD5
316	Phellodendri chinensis Cortex	Menisperine	DRD1
317	Phellodendri chinensis Cortex	Menisperine	ADRA2B
318	Phellodendri chinensis Cortex	Niloticin	SRD5A1
319	Phellodendri chinensis Cortex	Niloticin	ESR1
320	Phellodendri chinensis Cortex	Niloticin	PTGER4
321	Phellodendri chinensis Cortex	Niloticin	PGR
322	Phellodendri chinensis Cortex	Niloticin	AR
323	Phellodendri chinensis Cortex	Niloticin	NR3C1
324	Phellodendri chinensis Cortex	Niloticin	PTGER2
325	Phellodendri chinensis Cortex	Niloticin	PTGER3
326	Phellodendri chinensis Cortex	Niloticin	ANXA1
327	Phellodendri chinensis Cortex	Niloticin	NR3C2
328	Phellodendri chinensis Cortex	Niloticin	TUBB3
329	Phellodendri chinensis Cortex	Niloticin	NT5C2
330	Phellodendri chinensis Cortex	Niloticin	ADK
331	Phellodendri chinensis Cortex	Niloticin	IMPDH1
332	Phellodendri chinensis Cortex	Niloticin	ENPP1
333	Phellodendri chinensis Cortex	Delta7-Dehydrosophoramine	CHRNA4
334	Phellodendri chinensis Cortex	Delta7-Dehydrosophoramine	CHRNA7
335	Phellodendri chinensis Cortex	Delta7-Dehydrosophoramine	CHRNA3
336	Phellodendri chinensis Cortex	Delta7-Dehydrosophoramine	CHRNA6
337	Phellodendri chinensis Cortex	Delta7-Dehydrosophoramine	CHRFAM7A
338	Phellodendri chinensis Cortex	Delta7-Dehydrosophoramine	CACNA1H
339	Phellodendri chinensis Cortex	Delta7-Dehydrosophoramine	CACNA1F
340	Phellodendri chinensis Cortex	Delta7-Dehydrosophoramine	CHRM3
341	Phellodendri chinensis Cortex	Delta7-Dehydrosophoramine	CHRM1
342	Phellodendri chinensis Cortex	Delta7-Dehydrosophoramine	CACNA1I
343	Phellodendri chinensis Cortex	Delta7-Dehydrosophoramine	HTR1B
344	Phellodendri chinensis Cortex	Delta7-Dehydrosophoramine	CACNA1S
345	Phellodendri chinensis Cortex	Delta7-Dehydrosophoramine	HTR1D
346	Phellodendri chinensis Cortex	Delta7-Dehydrosophoramine	DRD2
347	Phellodendri chinensis Cortex	Delta7-Dehydrosophoramine	CACNA1C
348	Phellodendri chinensis Cortex	Delta7-Dehydrosophoramine	CACNA1D
349	Phellodendri chinensis Cortex	Delta7-Dehydrosophoramine	CHRM5
350	Phellodendri chinensis Cortex	Delta7-Dehydrosophoramine	HRH1
351	Phellodendri chinensis Cortex	Delta7-Dehydrosophoramine	HTR1F
352	Phellodendri chinensis Cortex	Delta7-Dehydrosophoramine	DRD5
353	Phellodendri chinensis Cortex	Delta7-Dehydrosophoramine	CACNA1G
354	Phellodendri chinensis Cortex	Delta7-Dehydrosophoramine	DRD1
355	Phellodendri chinensis Cortex	Delta7-Dehydrosophoramine	CHRM2
356	Phellodendri chinensis Cortex	Delta7-Dehydrosophoramine	CHRM4
357	Phellodendri chinensis Cortex	Javanicin	ESR1
358	Phellodendri chinensis Cortex	Tetrahydroberberine	CHRM3
359	Phellodendri chinensis Cortex	Tetrahydroberberine	DRD2
360	Phellodendri chinensis Cortex	Tetrahydroberberine	ACHE
361	Phellodendri chinensis Cortex	Tetrahydroberberine	SLC18A2
362	Phellodendri chinensis Cortex	Tetrahydroberberine	CHRNA2
363	Phellodendri chinensis Cortex	Tetrahydroberberine	HTR3A
364	Phellodendri chinensis Cortex	Tetrahydroberberine	BCHE
365	Phellodendri chinensis Cortex	Tetrahydroberberine	CHRM2
366	Phellodendri chinensis Cortex	Tetrahydroberberine	CYBA
367	Phellodendri chinensis Cortex	Tetrahydroberberine	CHRNA4
368	Phellodendri chinensis Cortex	Tetrahydroberberine	RAC2
369	Phellodendri chinensis Cortex	Tetrahydroberberine	RAC1
370	Phellodendri chinensis Cortex	Tetrahydroberberine	OPRD1
371	Phellodendri chinensis Cortex	Tetrahydroberberine	NCF4
372	Phellodendri chinensis Cortex	Tetrahydroberberine	CHRNA7
373	Phellodendri chinensis Cortex	Tetrahydroberberine	CYBB
374	Phellodendri chinensis Cortex	Tetrahydroberberine	NCF1
375	Phellodendri chinensis Cortex	Tetrahydroberberine	SIGMAR1
376	Phellodendri chinensis Cortex	Tetrahydroberberine	NCF2
377	Phellodendri chinensis Cortex	Tetrahydroberberine	OPRK1
378	Phellodendri chinensis Cortex	Tetrahydroberberine	CHRNA3
379	Phellodendri chinensis Cortex	Tetrahydroberberine	RAC3
380	Phellodendri chinensis Cortex	Tetrahydroberberine	CHRNB2
381	Phellodendri chinensis Cortex	Tetrahydroberberine	SLC6A4
382	Phellodendri chinensis Cortex	Tetrahydroberberine	OPRM1
383	Phellodendri chinensis Cortex	Tetrahydroberberine	PGRMC1
384	Phellodendri chinensis Cortex	Tetrahydroberberine	GRIN3A
385	Phellodendri chinensis Cortex	Tetrahydroberberine	CHRFAM7A
386	Phellodendri chinensis Cortex	Tetrahydroberberine	CHRNB4
387	Phellodendri chinensis Cortex	Tetrahydroberberine	SLC6A2
388	Phellodendri chinensis Cortex	Tetrahydroberberine	TLR4
389	Phellodendri chinensis Cortex	Tetrahydroberberine	ELANE
390	Phellodendri chinensis Cortex	Tetrahydroberberine	CTSG
391	Phellodendri chinensis Cortex	Tetrahydroberberine	SLC18A1
392	Phellodendri chinensis Cortex	Tetrahydroberberine	CEND1
393	Phellodendri chinensis Cortex	Tetrahydroberberine	SLC22A1
394	Phellodendri chinensis Cortex	Tetrahydroberberine	ADRA1B
395	Phellodendri chinensis Cortex	Tetrahydroberberine	WLS
396	Phellodendri chinensis Cortex	Tetrahydroberberine	CHRNA9
397	Phellodendri chinensis Cortex	Herculin	SRD5A1
398	Phellodendri chinensis Cortex	Herculin	AKR1D1
399	Phellodendri chinensis Cortex	Herculin	SRD5A2
400	Phellodendri chinensis Cortex	Herculin	XDH
401	Phellodendri chinensis Cortex	Herculin	AKR1C3
402	Phellodendri chinensis Cortex	Herculin	AOX1
403	Phellodendri chinensis Cortex	Herculin	ADA
404	Phellodendri chinensis Cortex	Herculin	SUOX
405	Phellodendri chinensis Cortex	Herculin	ACVRL1
406	Phellodendri chinensis Cortex	Herculin	DPYD
407	Phellodendri chinensis Cortex	Herculin	CYP1A2
408	Phellodendri chinensis Cortex	Herculin	CCL5
409	Phellodendri chinensis Cortex	Herculin	TH
410	Phellodendri chinensis Cortex	Herculin	CYP11A1
411	Phellodendri chinensis Cortex	Herculin	ID1
412	Phellodendri chinensis Cortex	Herculin	CYP39A1
413	Phellodendri chinensis Cortex	Herculin	HRG
414	Phellodendri chinensis Cortex	Herculin	DPYS
415	Phellodendri chinensis Cortex	Herculin	2022-03-01
416	Phellodendri chinensis Cortex	Herculin	ALDH6A1
417	Phellodendri chinensis Cortex	Herculin	SRD5A3
418	Phellodendri chinensis Cortex	Herculin	NOTCH4
419	Phellodendri chinensis Cortex	Herculin	CYP4B1
420	Phellodendri chinensis Cortex	Herculin	STAR
421	Phellodendri chinensis Cortex	Herculin	VHLL
422	Phellodendri chinensis Cortex	Herculin	ADGRA2
423	Phellodendri chinensis Cortex	Herculin	S1PR3
424	Phellodendri chinensis Cortex	Herculin	GDA
425	Phellodendri chinensis Cortex	Herculin	2022-03-02
426	Phellodendri chinensis Cortex	Herculin	UGT1A1
427	Phellodendri chinensis Cortex	Herculin	DAB2IP
428	Phellodendri chinensis Cortex	Herculin	CYP1A1
429	Phellodendri chinensis Cortex	Herculin	ADAMTS12
430	Phellodendri chinensis Cortex	Herculin	SULT2A1
431	Phellodendri chinensis Cortex	Magnograndiolide	AR
432	Phellodendri chinensis Cortex	Palmidin A	CHRM3
433	Phellodendri chinensis Cortex	Palmidin A	CHRM1
434	Phellodendri chinensis Cortex	Palmidin A	CHRM2
435	Phellodendri chinensis Cortex	Palmidin A	CHRM4
436	Phellodendri chinensis Cortex	Guanidine	GAMT
437	Phellodendri chinensis Cortex	Guanidine	DLG4
438	Phellodendri chinensis Cortex	Guanidine	RNASE1
439	Phellodendri chinensis Cortex	Guanidine	ALDH2
440	Phellodendri chinensis Cortex	Guanidine	KCND1
441	Phellodendri chinensis Cortex	Guanidine	KCNA3
442	Phellodendri chinensis Cortex	Guanidine	PRKAB1
443	Phellodendri chinensis Cortex	Guanidine	ADH1A
444	Phellodendri chinensis Cortex	Guanidine	KCNA10
445	Phellodendri chinensis Cortex	Guanidine	KCNC3
446	Phellodendri chinensis Cortex	Guanidine	KCNA1
447	Phellodendri chinensis Cortex	Guanidine	KCNA2
448	Phellodendri chinensis Cortex	Guanidine	TPO
449	Phellodendri chinensis Cortex	Guanidine	CAT
450	Phellodendri chinensis Cortex	Guanidine	KCNB1
451	Phellodendri chinensis Cortex	Guanidine	ADH1B
452	Phellodendri chinensis Cortex	Guanidine	KCNC2
453	Phellodendri chinensis Cortex	Guanidine	KCNC1
454	Phellodendri chinensis Cortex	Guanidine	ADH1C
455	Phellodendri chinensis Cortex	Guanidine	KCNB2
456	Phellodendri chinensis Cortex	Guanidine	KCNA5
457	Phellodendri chinensis Cortex	Guanidine	KCND2
458	Phellodendri chinensis Cortex	Guanidine	KCNA4
459	Phellodendri chinensis Cortex	Guanidine	KCNA7
460	Phellodendri chinensis Cortex	Guanidine	KCNA6
461	Phellodendri chinensis Cortex	Guanidine	KCND3
462	Phellodendri chinensis Cortex	Guanidine	GUCY1B3
463	Phellodendri chinensis Cortex	Guanidine	GATM
464	Phellodendri chinensis Cortex	Guanidine	KCNK4
465	Phellodendri chinensis Cortex	Guanidine	IYD
466	Phellodendri chinensis Cortex	Guanidine	KCNQ1
467	Phellodendri chinensis Cortex	Guanidine	FBP1
468	Phellodendri chinensis Cortex	Guanidine	DGKI
469	Phellodendri chinensis Cortex	Guanidine	ADH7
470	Phellodendri chinensis Cortex	Guanidine	NFIB
471	Phellodendri chinensis Cortex	Guanidine	CYGB
472	Phellodendri chinensis Cortex	Guanidine	NRXN3
473	Phellodendri chinensis Cortex	Guanidine	LRRC4B
474	Phellodendri chinensis Cortex	Guanidine	AQP8
475	Phellodendri chinensis Cortex	Guanidine	ARX
476	Phellodendri chinensis Cortex	Guanidine	IGF1
477	Phellodendri chinensis Cortex	Guanidine	SHANK3
478	Phellodendri chinensis Cortex	Guanidine	ACY3
479	Phellodendri chinensis Cortex	Guanidine	ASPA
480	Phellodendri chinensis Cortex	Guanidine	NRXN1
481	Phellodendri chinensis Cortex	Guanidine	EDN1
482	Phellodendri chinensis Cortex	Guanidine	OXT
483	Phellodendri chinensis Cortex	Guanidine	MAGI2
484	Phellodendri chinensis Cortex	Guanidine	APOE
485	Phellodendri chinensis Cortex	Guanidine	SOX15
486	Phellodendri chinensis Cortex	Guanidine	CNTNAP4
487	Phellodendri chinensis Cortex	Guanidine	RNASE4
488	Phellodendri chinensis Cortex	Guanidine	RAB3A
489	Phellodendri chinensis Cortex	Guanidine	MC4R
490	Phellodendri chinensis Cortex	Guanidine	IL1B
491	Phellodendri chinensis Cortex	Guanidine	GRIN2A
492	Phellodendri chinensis Cortex	Guanidine	SLC17A7
493	Phellodendri chinensis Cortex	Guanidine	CYP11A1
494	Phellodendri chinensis Cortex	Guanidine	SCN5A
495	Phellodendri chinensis Cortex	Guanidine	SCN10A
496	Phellodendri chinensis Cortex	Guanidine	SPARC
497	Phellodendri chinensis Cortex	Guanidine	SORCS3
498	Phellodendri chinensis Cortex	Guanidine	RNASE8
499	Phellodendri chinensis Cortex	Guanidine	KCNIP2
500	Phellodendri chinensis Cortex	Guanidine	GPX7
501	Phellodendri chinensis Cortex	Guanidine	CRLF1
502	Phellodendri chinensis Cortex	Guanidine	FADD
503	Phellodendri chinensis Cortex	Guanidine	SNTG2
504	Phellodendri chinensis Cortex	Guanidine	SCGB1A1
505	Phellodendri chinensis Cortex	Guanidine	OXTR
506	Phellodendri chinensis Cortex	Guanidine	ALDH1B1
507	Phellodendri chinensis Cortex	Guanidine	LEP
508	Phellodendri chinensis Cortex	Guanidine	NLGN1
509	Phellodendri chinensis Cortex	Guanidine	CACNA1D
510	Phellodendri chinensis Cortex	Guanidine	RAPGEF2
511	Phellodendri chinensis Cortex	Guanidine	DARS
512	Phellodendri chinensis Cortex	Guanidine	ANK3
513	Phellodendri chinensis Cortex	Guanidine	KCNE5
514	Phellodendri chinensis Cortex	Guanidine	PPARD
515	Phellodendri chinensis Cortex	Guanidine	NKX2-1
516	Phellodendri chinensis Cortex	Guanidine	MIP
517	Phellodendri chinensis Cortex	Guanidine	RYR3
518	Phellodendri chinensis Cortex	Guanidine	ZPR1
519	Phellodendri chinensis Cortex	Guanidine	ALDH3B1
520	Phellodendri chinensis Cortex	Guanidine	NPPA
521	Phellodendri chinensis Cortex	Guanidine	STX1A
522	Phellodendri chinensis Cortex	Guanidine	PAXBP1
523	Phellodendri chinensis Cortex	Guanidine	PAX7
524	Phellodendri chinensis Cortex	Guanidine	ALDH3B2
525	Phellodendri chinensis Cortex	Guanidine	RNASE2
526	Phellodendri chinensis Cortex	Guanidine	NRXN2
527	Phellodendri chinensis Cortex	Guanidine	ADORA1
528	Phellodendri chinensis Cortex	Guanidine	ADH4
529	Phellodendri chinensis Cortex	Guanidine	GJA5
530	Phellodendri chinensis Cortex	Guanidine	FAS
531	Phellodendri chinensis Cortex	Guanidine	DAB2IP
532	Phellodendri chinensis Cortex	Guanidine	CYP2E1
533	Phellodendri chinensis Cortex	Guanidine	ACY1
534	Phellodendri chinensis Cortex	Beta-Sitosterol	ESR1
535	Phellodendri chinensis Cortex	Beta-Sitosterol	PGR
536	Phellodendri chinensis Cortex	Beta-Sitosterol	VDR
537	Phellodendri chinensis Cortex	Beta-Sitosterol	CYP27B1
538	Phellodendri chinensis Cortex	Beta-Sitosterol	GC
539	Phellodendri chinensis Cortex	Beta-Sitosterol	SNW1
540	Phellodendri chinensis Cortex	Beta-Sitosterol	AR
541	Phellodendri chinensis Cortex	Beta-Sitosterol	NR3C1
542	Phellodendri chinensis Cortex	Beta-Sitosterol	NFKB1
543	Phellodendri chinensis Cortex	Beta-Sitosterol	AKR1C3
544	Phellodendri chinensis Cortex	Beta-Sitosterol	CYP24A1
545	Phellodendri chinensis Cortex	Beta-Sitosterol	GPBAR1
546	Phellodendri chinensis Cortex	Beta-Sitosterol	SNAI2
547	Phellodendri chinensis Cortex	Beta-Sitosterol	MED1
548	Phellodendri chinensis Cortex	Beta-Sitosterol	SNAI1
549	Phellodendri chinensis Cortex	Beta-Sitosterol	CYP3A4
550	Phellodendri chinensis Cortex	Beta-Sitosterol	CALB1
551	Phellodendri chinensis Cortex	Beta-Sitosterol	FGF23
552	Phellodendri chinensis Cortex	Beta-Sitosterol	GFI1
553	Phellodendri chinensis Cortex	Beta-Sitosterol	LANCL2
554	Phellodendri chinensis Cortex	Beta-Sitosterol	WNT4
555	Phellodendri chinensis Cortex	Beta-Sitosterol	TCF3
556	Phellodendri chinensis Cortex	Beta-Sitosterol	BAX
557	Phellodendri chinensis Cortex	Beta-Sitosterol	KL
558	Phellodendri chinensis Cortex	Beta-Sitosterol	CYP2R1
559	Phellodendri chinensis Cortex	Beta-Sitosterol	PML
560	Phellodendri chinensis Cortex	Beta-Sitosterol	B4GALT1
561	Phellodendri chinensis Cortex	Beta-Sitosterol	S100G
562	Phellodendri chinensis Cortex	Beta-Sitosterol	CYP27A1
563	Phellodendri chinensis Cortex	Beta-Sitosterol	KANK2
564	Phellodendri chinensis Cortex	Beta-Sitosterol	IRX5
565	Phellodendri chinensis Cortex	Beta-Sitosterol	RXRA
566	Phellodendri chinensis Cortex	Beta-Sitosterol	NR1H4
567	Phellodendri chinensis Cortex	Beta-Sitosterol	TRIM24
568	Phellodendri chinensis Cortex	Campesterol	ESR1
569	Phellodendri chinensis Cortex	Campesterol	PGR
570	Phellodendri chinensis Cortex	Campesterol	AR
571	Phellodendri chinensis Cortex	Campesterol	NR3C1
572	Phellodendri chinensis Cortex	Campesterol	ANXA1
573	Phellodendri chinensis Cortex	Campesterol	VDR
574	Phellodendri chinensis Cortex	Candicine	SLC6A3
575	Phellodendri chinensis Cortex	Candicine	ADRA1A
576	Phellodendri chinensis Cortex	Candicine	MAPK1
577	Phellodendri chinensis Cortex	Candicine	ADRB2
578	Phellodendri chinensis Cortex	Candicine	ADRA2A
579	Phellodendri chinensis Cortex	Candicine	TNF
580	Phellodendri chinensis Cortex	Candicine	PIK3R3
581	Phellodendri chinensis Cortex	Candicine	MAOB
582	Phellodendri chinensis Cortex	Candicine	ADRB1
583	Phellodendri chinensis Cortex	Candicine	PIK3R1
584	Phellodendri chinensis Cortex	Candicine	SLC18A1
585	Phellodendri chinensis Cortex	Candicine	ADRA1D
586	Phellodendri chinensis Cortex	Candicine	DRD2
587	Phellodendri chinensis Cortex	Candicine	PAH
588	Phellodendri chinensis Cortex	Candicine	MAOA
589	Phellodendri chinensis Cortex	Candicine	SLC6A4
590	Phellodendri chinensis Cortex	Candicine	SLC18A2
591	Phellodendri chinensis Cortex	Candicine	DRD4
592	Phellodendri chinensis Cortex	Candicine	HTR7
593	Phellodendri chinensis Cortex	Candicine	HTR1A
594	Phellodendri chinensis Cortex	Candicine	ADRA1B
595	Phellodendri chinensis Cortex	Candicine	ADRA2C
596	Phellodendri chinensis Cortex	Candicine	DBH
597	Phellodendri chinensis Cortex	Candicine	DRD3
598	Phellodendri chinensis Cortex	Candicine	DRD5
599	Phellodendri chinensis Cortex	Candicine	DRD1
600	Phellodendri chinensis Cortex	Candicine	PIK3R2
601	Phellodendri chinensis Cortex	Candicine	ADRB3
602	Phellodendri chinensis Cortex	Candicine	TAAR1
603	Phellodendri chinensis Cortex	Candicine	ADRA2B
604	Phellodendri chinensis Cortex	Candicine	SLC6A2
605	Phellodendri chinensis Cortex	Obamegine	CHRNA2
606	Phellodendri chinensis Cortex	Obamegine	HTR3A
607	Phellodendri chinensis Cortex	Obamegine	CHRM2
608	Phellodendri chinensis Cortex	Obamegine	CHRM3
609	Phellodendri chinensis Cortex	Obamegine	DRD2
610	Phellodendri chinensis Cortex	Obamegine	SLC18A2
611	Phellodendri chinensis Cortex	Obamegine	BCHE

## Sheet: S3
Table S3 The ingredients and corresponding active targets of honeysuckle
Num	Herbs	compound	target genes (gene symbol)
1	honeysuckle	Menthyl Acetate	NPR1
2	honeysuckle	Menthyl Acetate	AR
3	honeysuckle	Menthyl Acetate	NPR3
4	honeysuckle	Menthyl Acetate	NPR2
5	honeysuckle	Inositol	TRPV3
6	honeysuckle	Inositol	OPRK1
7	honeysuckle	Inositol	TRPM8
8	honeysuckle	Inositol	TRPA1
9	honeysuckle	Carvacrol	GABRA2
10	honeysuckle	Carvacrol	GABRD
11	honeysuckle	Carvacrol	PDE3A
12	honeysuckle	Carvacrol	GABRB1
13	honeysuckle	Carvacrol	GABRG3
14	honeysuckle	Carvacrol	TNF
15	honeysuckle	Carvacrol	GABRE
16	honeysuckle	Carvacrol	SCN2A
17	honeysuckle	Carvacrol	GABRA3
18	honeysuckle	Carvacrol	GABRG1
19	honeysuckle	Carvacrol	GABRP
20	honeysuckle	Carvacrol	GABRA4
21	honeysuckle	Carvacrol	GABRB2
22	honeysuckle	Carvacrol	ACHE
23	honeysuckle	Carvacrol	SCN4A
24	honeysuckle	Carvacrol	GABRQ
25	honeysuckle	Carvacrol	GABRB3
26	honeysuckle	Carvacrol	GABRA5
27	honeysuckle	Carvacrol	GABRA6
28	honeysuckle	Carvacrol	GABRA1
29	honeysuckle	Carvacrol	PDE4B
30	honeysuckle	Carvacrol	BCHE
31	honeysuckle	Carvacrol	GABRG2
32	honeysuckle	Carvacrol	PDE3B
33	honeysuckle	Carvacrol	PDE4D
34	honeysuckle	Carvacrol	COLQ
35	honeysuckle	Carvacrol	LTA
36	honeysuckle	Carvacrol	RXRA
37	honeysuckle	Carvacrol	SLC6A3
38	honeysuckle	Carvacrol	DRD2
39	honeysuckle	Carvacrol	SLC6A4
40	honeysuckle	Carvacrol	DRD4
41	honeysuckle	Carvacrol	HTR7
42	honeysuckle	Carvacrol	HTR1A
43	honeysuckle	Carvacrol	DBH
44	honeysuckle	Carvacrol	DRD3
45	honeysuckle	Carvacrol	ALOX5
46	honeysuckle	Carvacrol	DRD5
47	honeysuckle	Carvacrol	DRD1
48	honeysuckle	Carvacrol	SLC6A2
49	honeysuckle	Carvacrol	SCN1A
50	honeysuckle	Carvacrol	SCN3A
51	honeysuckle	Carvacrol	HMGA2
52	honeysuckle	Carvacrol	PDE5A
53	honeysuckle	Carvacrol	APOA2
54	honeysuckle	Carvacrol	SLC5A7
55	honeysuckle	Carvacrol	SEMA4D
56	honeysuckle	Carvacrol	NRG1
57	honeysuckle	Carvacrol	CD74
58	honeysuckle	Carvacrol	HPX
59	honeysuckle	Carvacrol	SIRT2
60	honeysuckle	Carvacrol	MIF
61	honeysuckle	Carvacrol	DMGDH
62	honeysuckle	Carvacrol	NKX3-1
63	honeysuckle	Carvacrol	SIX3
64	honeysuckle	Carvacrol	HCN4
65	honeysuckle	Carvacrol	FASLG
66	honeysuckle	Carvacrol	LGALS3
67	honeysuckle	Carvacrol	KLF4
68	honeysuckle	Carvacrol	LILRB1
69	honeysuckle	Carvacrol	NCKAP1L
70	honeysuckle	Carvacrol	CRP
71	honeysuckle	Carvacrol	TLR3
72	honeysuckle	Carvacrol	EPO
73	honeysuckle	Carvacrol	MAP2K5
74	honeysuckle	Carvacrol	EIF2AK1
75	honeysuckle	Carvacrol	IL1B
76	honeysuckle	Carvacrol	SHH
77	honeysuckle	Carvacrol	RIPK1
78	honeysuckle	Carvacrol	FGF10
79	honeysuckle	Carvacrol	PRSS12
80	honeysuckle	Carvacrol	SLC44A4
81	honeysuckle	Carvacrol	ADORA2B
82	honeysuckle	Carvacrol	ALDH7A1
83	honeysuckle	Carvacrol	FADD
84	honeysuckle	Carvacrol	FGFR2
85	honeysuckle	Carvacrol	ANGPT1
86	honeysuckle	Carvacrol	AURKA
87	honeysuckle	Carvacrol	WNT2
88	honeysuckle	Carvacrol	YBX3
89	honeysuckle	Carvacrol	IL1RN
90	honeysuckle	Carvacrol	PLN
91	honeysuckle	Carvacrol	DNM3
92	honeysuckle	Carvacrol	FCER2
93	honeysuckle	Carvacrol	WNT2B
94	honeysuckle	Carvacrol	IFNG
95	honeysuckle	Carvacrol	HRC
96	honeysuckle	Carvacrol	TGFB2
97	honeysuckle	Carvacrol	RAPGEF2
98	honeysuckle	Carvacrol	TIRAP
99	honeysuckle	Carvacrol	ROCK2
100	honeysuckle	Carvacrol	ADIRF
101	honeysuckle	Carvacrol	BDKRB2
102	honeysuckle	Carvacrol	ASCL1
103	honeysuckle	Carvacrol	ENPP6
104	honeysuckle	Carvacrol	CAMK2D
105	honeysuckle	Carvacrol	IL10
106	honeysuckle	Carvacrol	CDH8
107	honeysuckle	Carvacrol	NCOA1
108	honeysuckle	Carvacrol	IL6
109	honeysuckle	Carvacrol	ROCK1
110	honeysuckle	Carvacrol	FNTA
111	honeysuckle	Carvacrol	HPN
112	honeysuckle	Carvacrol	KMT2A
113	honeysuckle	Carvacrol	NOD2
114	honeysuckle	Carvacrol	BMP4
115	honeysuckle	Carvacrol	AHCY
116	honeysuckle	Carvacrol	APOA1
117	honeysuckle	Carvacrol	ARHGEF2
118	honeysuckle	Carvacrol	IL4
119	honeysuckle	Carvacrol	AGRN
120	honeysuckle	Carvacrol	IKBKB
121	honeysuckle	Carvacrol	IDO1
122	honeysuckle	Carvacrol	CTNNB1
123	honeysuckle	Carvacrol	CHKA
124	honeysuckle	Carvacrol	PDE2A
125	honeysuckle	Carvacrol	CHDH
126	honeysuckle	Carvacrol	SOX9
127	honeysuckle	Carvacrol	CAMK2G
128	honeysuckle	Carvacrol	FAS
129	honeysuckle	Carvacrol	GRIN1
130	honeysuckle	Carvacrol	HCN2
131	honeysuckle	Methyl Palmitate	NPR1
132	honeysuckle	Methyl Palmitate	SCN11A
133	honeysuckle	Methyl Palmitate	SCN2B
134	honeysuckle	Methyl Palmitate	ABAT
135	honeysuckle	Methyl Palmitate	SCN1A
136	honeysuckle	Methyl Palmitate	ESRRG
137	honeysuckle	Methyl Palmitate	SCN3B
138	honeysuckle	Methyl Palmitate	COX6C
139	honeysuckle	Methyl Palmitate	COX5B
140	honeysuckle	Methyl Palmitate	COX7C
141	honeysuckle	Methyl Palmitate	COX1
142	honeysuckle	Methyl Palmitate	SCN3A
143	honeysuckle	Methyl Palmitate	AKR1C2
144	honeysuckle	Methyl Palmitate	SCN7A
145	honeysuckle	Methyl Palmitate	SCN5A
146	honeysuckle	Methyl Palmitate	SCN10A
147	honeysuckle	Methyl Palmitate	AKR1D1
148	honeysuckle	Methyl Palmitate	ALDH5A1
149	honeysuckle	Methyl Palmitate	SCN2A
150	honeysuckle	Methyl Palmitate	COX5A
151	honeysuckle	Methyl Palmitate	COX3
152	honeysuckle	Methyl Palmitate	AR
153	honeysuckle	Methyl Palmitate	COX7A1
154	honeysuckle	Methyl Palmitate	FECH
155	honeysuckle	Methyl Palmitate	COX4I1
156	honeysuckle	Methyl Palmitate	HDAC9
157	honeysuckle	Methyl Palmitate	PLA2G1B
158	honeysuckle	Methyl Palmitate	COX6A2
159	honeysuckle	Methyl Palmitate	TYR
160	honeysuckle	Methyl Palmitate	SCN9A
161	honeysuckle	Methyl Palmitate	SCN4A
162	honeysuckle	Methyl Palmitate	SCN4B
163	honeysuckle	Methyl Palmitate	ADH1C
164	honeysuckle	Methyl Palmitate	COX6B1
165	honeysuckle	Methyl Palmitate	FABP6
166	honeysuckle	Methyl Palmitate	CES1
167	honeysuckle	Methyl Palmitate	SRD5A2
168	honeysuckle	Methyl Palmitate	ACADSB
169	honeysuckle	Methyl Palmitate	SCN8A
170	honeysuckle	Methyl Palmitate	COX7B
171	honeysuckle	Methyl Palmitate	SCN1B
172	honeysuckle	Methyl Palmitate	COX2
173	honeysuckle	Methyl Palmitate	OGDH
174	honeysuckle	Methyl Palmitate	HDAC2
175	honeysuckle	Methyl Palmitate	COX8A
176	honeysuckle	Methyl Palmitate	NR1H4
177	honeysuckle	Methyl Palmitate	NPR3
178	honeysuckle	Methyl Palmitate	NPR2
179	honeysuckle	1-Hexanol	TRPV3
180	honeysuckle	1-Hexanol	OPRK1
181	honeysuckle	1-Hexanol	TRPM8
182	honeysuckle	1-Hexanol	TRPA1
183	honeysuckle	1-Hexanol	CACNB1
184	honeysuckle	1-Hexanol	GRIA4
185	honeysuckle	1-Hexanol	GABRA2
186	honeysuckle	1-Hexanol	CACNG2
187	honeysuckle	1-Hexanol	GABRD
188	honeysuckle	1-Hexanol	CHRNA4
189	honeysuckle	1-Hexanol	CHRNB3
190	honeysuckle	1-Hexanol	GABRB1
191	honeysuckle	1-Hexanol	GRIA1
192	honeysuckle	1-Hexanol	GLRA2
193	honeysuckle	1-Hexanol	KCNJ3
194	honeysuckle	1-Hexanol	GABRG3
195	honeysuckle	1-Hexanol	VCAM1
196	honeysuckle	1-Hexanol	CHRNA7
197	honeysuckle	1-Hexanol	KCNJ6
198	honeysuckle	1-Hexanol	GABRE
199	honeysuckle	1-Hexanol	GABRA3
200	honeysuckle	1-Hexanol	SLC29A1
201	honeysuckle	1-Hexanol	CACNA1S
202	honeysuckle	1-Hexanol	GABRG1
203	honeysuckle	1-Hexanol	GABRP
204	honeysuckle	1-Hexanol	CHRNA10
205	honeysuckle	1-Hexanol	GRIA2
206	honeysuckle	1-Hexanol	GABRA4
207	honeysuckle	1-Hexanol	CHRNA3
208	honeysuckle	1-Hexanol	GABRB2
209	honeysuckle	1-Hexanol	CACNA1C
210	honeysuckle	1-Hexanol	CHRNB2
211	honeysuckle	1-Hexanol	CACNA1D
212	honeysuckle	1-Hexanol	HTR3D
213	honeysuckle	1-Hexanol	GABRQ
214	honeysuckle	1-Hexanol	CHRNA2
215	honeysuckle	1-Hexanol	CHRNA6
216	honeysuckle	1-Hexanol	GABRB3
217	honeysuckle	1-Hexanol	KCNJ5
218	honeysuckle	1-Hexanol	GRIN3A
219	honeysuckle	1-Hexanol	HTR3B
220	honeysuckle	1-Hexanol	GRIA3
221	honeysuckle	1-Hexanol	GABRA5
222	honeysuckle	1-Hexanol	SLC29A2
223	honeysuckle	1-Hexanol	HTR3E
224	honeysuckle	1-Hexanol	GABRA6
225	honeysuckle	1-Hexanol	HTR3A
226	honeysuckle	1-Hexanol	GABRA1
227	honeysuckle	1-Hexanol	CHRNA9
228	honeysuckle	1-Hexanol	CHRFAM7A
229	honeysuckle	1-Hexanol	CHRNA5
230	honeysuckle	1-Hexanol	CHRNB4
231	honeysuckle	1-Hexanol	KCNJ9
232	honeysuckle	1-Hexanol	HTR3C
233	honeysuckle	1-Hexanol	GLRA1
234	honeysuckle	1-Hexanol	CACNG1
235	honeysuckle	1-Hexanol	ADAM8
236	honeysuckle	1-Hexanol	SLC28A3
237	honeysuckle	1-Hexanol	ADRA1B
238	honeysuckle	1-Hexanol	FOXL2
239	honeysuckle	1-Hexanol	DMTN
240	honeysuckle	1-Hexanol	KCNMA1
241	honeysuckle	1-Hexanol	GLRA3
242	honeysuckle	1-Hexanol	HMGA2
243	honeysuckle	1-Hexanol	CACNA1H
244	honeysuckle	1-Hexanol	SLITRK6
245	honeysuckle	1-Hexanol	UTS2
246	honeysuckle	1-Hexanol	NAV2
247	honeysuckle	1-Hexanol	P2RX2
248	honeysuckle	1-Hexanol	HTR2A
249	honeysuckle	1-Hexanol	AVPR1A
250	honeysuckle	1-Hexanol	ADORA2A
251	honeysuckle	1-Hexanol	CACNA1A
252	honeysuckle	1-Hexanol	ANK2
253	honeysuckle	1-Hexanol	ZP4
254	honeysuckle	1-Hexanol	SUMO1
255	honeysuckle	1-Hexanol	CNR2
256	honeysuckle	1-Hexanol	MTNR1B
257	honeysuckle	1-Hexanol	SCN5A
258	honeysuckle	1-Hexanol	MAOB
259	honeysuckle	1-Hexanol	GLRB
260	honeysuckle	1-Hexanol	P2RX3
261	honeysuckle	1-Hexanol	SLC44A4
262	honeysuckle	1-Hexanol	FLOT1
263	honeysuckle	1-Hexanol	NPY5R
264	honeysuckle	1-Hexanol	MSN
265	honeysuckle	1-Hexanol	GHRL
266	honeysuckle	1-Hexanol	TBR1
267	honeysuckle	1-Hexanol	ADRA1D
268	honeysuckle	1-Hexanol	DRD2
269	honeysuckle	1-Hexanol	AVP
270	honeysuckle	1-Hexanol	PAX2
271	honeysuckle	1-Hexanol	AOC1
272	honeysuckle	1-Hexanol	MAOA
273	honeysuckle	1-Hexanol	UTS2R
274	honeysuckle	1-Hexanol	ADIRF
275	honeysuckle	1-Hexanol	GHRH
276	honeysuckle	1-Hexanol	HCRT
277	honeysuckle	1-Hexanol	RAB3B
278	honeysuckle	1-Hexanol	KCNE5
279	honeysuckle	1-Hexanol	CNR1
280	honeysuckle	1-Hexanol	SLC18A3
281	honeysuckle	1-Hexanol	EZR
282	honeysuckle	1-Hexanol	DRD4
283	honeysuckle	1-Hexanol	CRH
284	honeysuckle	1-Hexanol	GLI3
285	honeysuckle	1-Hexanol	CAV3
286	honeysuckle	1-Hexanol	SLC9A6
287	honeysuckle	1-Hexanol	AOC3
288	honeysuckle	1-Hexanol	NCOA1
289	honeysuckle	1-Hexanol	AOC2
290	honeysuckle	1-Hexanol	IL6
291	honeysuckle	1-Hexanol	GLRA4
292	honeysuckle	1-Hexanol	RNF207
293	honeysuckle	1-Hexanol	ROCK1
294	honeysuckle	1-Hexanol	KCNA5
295	honeysuckle	1-Hexanol	TACR2
296	honeysuckle	1-Hexanol	NRP1
297	honeysuckle	1-Hexanol	NPPA
298	honeysuckle	1-Hexanol	KMT2A
299	honeysuckle	1-Hexanol	TNR
300	honeysuckle	1-Hexanol	ZP3
301	honeysuckle	1-Hexanol	PLCB1
302	honeysuckle	1-Hexanol	EPHB1
303	honeysuckle	1-Hexanol	DRD1
304	honeysuckle	1-Hexanol	EEA1
305	honeysuckle	1-Hexanol	POU4F3
306	honeysuckle	1-Hexanol	CALCA
307	honeysuckle	1-Hexanol	PINK1
308	honeysuckle	1-Hexanol	KCNQ1
309	honeysuckle	1-Hexanol	ICAM1
310	honeysuckle	1-Hexanol	CARTPT
311	honeysuckle	1-Hexanol	ATP8B1
312	honeysuckle	1-Hexanol	KISS1
313	honeysuckle	1-Hexanol	GRM7
314	honeysuckle	1-Hexanol	FOS
315	honeysuckle	1-Hexanol	GRIN1
316	honeysuckle	Methyl Linoleate	SLC8A1
317	honeysuckle	Methyl Linoleate	F12
318	honeysuckle	Methyl Linoleate	ESR1
319	honeysuckle	Methyl Linoleate	TRPV1
320	honeysuckle	Methyl Linoleate	PTGER4
321	honeysuckle	Methyl Linoleate	PGR
322	honeysuckle	Methyl Linoleate	AR
323	honeysuckle	Methyl Linoleate	FADS2
324	honeysuckle	Methyl Linoleate	FADS1
325	honeysuckle	Methyl Linoleate	PTGER2
326	honeysuckle	Methyl Linoleate	PTGS1
327	honeysuckle	Methyl Linoleate	PTGER3
328	honeysuckle	Methyl Linoleate	PTGS2
329	honeysuckle	Methyl Linoleate	ELOVL4
330	honeysuckle	Methyl Linoleate	NR3C2
331	honeysuckle	2-Heptadecanone	SCN11A
332	honeysuckle	2-Heptadecanone	SCN2B
333	honeysuckle	2-Heptadecanone	ABAT
334	honeysuckle	2-Heptadecanone	SCN1A
335	honeysuckle	2-Heptadecanone	SCN3B
336	honeysuckle	2-Heptadecanone	SCN3A
337	honeysuckle	2-Heptadecanone	SCN7A
338	honeysuckle	2-Heptadecanone	SCN5A
339	honeysuckle	2-Heptadecanone	SCN10A
340	honeysuckle	2-Heptadecanone	AKR1D1
341	honeysuckle	2-Heptadecanone	ALDH5A1
342	honeysuckle	2-Heptadecanone	SCN2A
343	honeysuckle	2-Heptadecanone	HDAC9
344	honeysuckle	2-Heptadecanone	TYR
345	honeysuckle	2-Heptadecanone	SCN9A
346	honeysuckle	2-Heptadecanone	SCN4A
347	honeysuckle	2-Heptadecanone	SCN4B
348	honeysuckle	2-Heptadecanone	SRD5A2
349	honeysuckle	2-Heptadecanone	ACADSB
350	honeysuckle	2-Heptadecanone	SCN8A
351	honeysuckle	2-Heptadecanone	SCN1B
352	honeysuckle	2-Heptadecanone	OGDH
353	honeysuckle	2-Heptadecanone	HDAC2
354	honeysuckle	Stigmasterol	KCND1
355	honeysuckle	Stigmasterol	KCNA3
356	honeysuckle	Stigmasterol	PRKAB1
357	honeysuckle	Stigmasterol	ADH1A
358	honeysuckle	Stigmasterol	KCNA10
359	honeysuckle	Stigmasterol	GAMT
360	honeysuckle	Stigmasterol	KCNC3
361	honeysuckle	Stigmasterol	KCNA1
362	honeysuckle	Stigmasterol	KCNA2
363	honeysuckle	Stigmasterol	TPO
364	honeysuckle	Stigmasterol	CAT
365	honeysuckle	Stigmasterol	KCNB1
366	honeysuckle	Stigmasterol	ADH1B
367	honeysuckle	Stigmasterol	DLG4
368	honeysuckle	Stigmasterol	KCNC2
369	honeysuckle	Stigmasterol	KCNC1
370	honeysuckle	Stigmasterol	ADH1C
371	honeysuckle	Stigmasterol	KCNB2
372	honeysuckle	Stigmasterol	KCNA5
373	honeysuckle	Stigmasterol	RNASE1
374	honeysuckle	Stigmasterol	KCND2
375	honeysuckle	Stigmasterol	ALDH2
376	honeysuckle	Stigmasterol	KCNA4
377	honeysuckle	Stigmasterol	KCNA7
378	honeysuckle	Stigmasterol	KCNA6
379	honeysuckle	Stigmasterol	KCND3
380	honeysuckle	Stigmasterol	GUCY1B3
381	honeysuckle	Stigmasterol	GATM
382	honeysuckle	Stigmasterol	KCNK4
383	honeysuckle	Stigmasterol	IYD
384	honeysuckle	Stigmasterol	KCNQ1
385	honeysuckle	Stigmasterol	RDH11
386	honeysuckle	Stigmasterol	RBP3
387	honeysuckle	Stigmasterol	RETSAT
388	honeysuckle	Stigmasterol	CYP17A1
389	honeysuckle	Stigmasterol	RDH13
390	honeysuckle	Stigmasterol	DHRS3
391	honeysuckle	Stigmasterol	RDH5
392	honeysuckle	Stigmasterol	ESR1
393	honeysuckle	Stigmasterol	PGR
394	honeysuckle	Stigmasterol	ALDH1A3
395	honeysuckle	Stigmasterol	RDH12
396	honeysuckle	Stigmasterol	OPRK1
397	honeysuckle	Stigmasterol	DHRS4
398	honeysuckle	Stigmasterol	RBP1
399	honeysuckle	Stigmasterol	ALDH1A1
400	honeysuckle	Stigmasterol	RLBP1
401	honeysuckle	Stigmasterol	RDH14
402	honeysuckle	Stigmasterol	RDH8
403	honeysuckle	Stigmasterol	LRAT
404	honeysuckle	Stigmasterol	ALDH1A2
405	honeysuckle	Stigmasterol	NR3C2
406	honeysuckle	Stigmasterol	FBP1
407	honeysuckle	Stigmasterol	DGKI
408	honeysuckle	Stigmasterol	ADH7
409	honeysuckle	Stigmasterol	NFIB
410	honeysuckle	Stigmasterol	CYGB
411	honeysuckle	Stigmasterol	NRXN3
412	honeysuckle	Stigmasterol	LRRC4B
413	honeysuckle	Stigmasterol	AQP8
414	honeysuckle	Stigmasterol	ARX
415	honeysuckle	Stigmasterol	IGF1
416	honeysuckle	Stigmasterol	SHANK3
417	honeysuckle	Stigmasterol	ACY3
418	honeysuckle	Stigmasterol	ASPA
419	honeysuckle	Stigmasterol	NRXN1
420	honeysuckle	Stigmasterol	EDN1
421	honeysuckle	Stigmasterol	OXT
422	honeysuckle	Stigmasterol	MAGI2
423	honeysuckle	Stigmasterol	APOE
424	honeysuckle	Stigmasterol	SOX15
425	honeysuckle	Stigmasterol	CNTNAP4
426	honeysuckle	Stigmasterol	RNASE4
427	honeysuckle	Stigmasterol	RAB3A
428	honeysuckle	Stigmasterol	MC4R
429	honeysuckle	Stigmasterol	IL1B
430	honeysuckle	Stigmasterol	GRIN2A
431	honeysuckle	Stigmasterol	SLC17A7
432	honeysuckle	Stigmasterol	CYP11A1
433	honeysuckle	Stigmasterol	SCN5A
434	honeysuckle	Stigmasterol	SCN10A
435	honeysuckle	Stigmasterol	SPARC
436	honeysuckle	Stigmasterol	SORCS3
437	honeysuckle	Stigmasterol	RNASE8
438	honeysuckle	Stigmasterol	KCNIP2
439	honeysuckle	Stigmasterol	GPX7
440	honeysuckle	Stigmasterol	CRLF1
441	honeysuckle	Stigmasterol	FADD
442	honeysuckle	Stigmasterol	SNTG2
443	honeysuckle	Stigmasterol	SCGB1A1
444	honeysuckle	Stigmasterol	OXTR
445	honeysuckle	Stigmasterol	ALDH1B1
446	honeysuckle	Stigmasterol	LEP
447	honeysuckle	Stigmasterol	NLGN1
448	honeysuckle	Stigmasterol	CACNA1D
449	honeysuckle	Stigmasterol	RAPGEF2
450	honeysuckle	Stigmasterol	DARS
451	honeysuckle	Stigmasterol	ANK3
452	honeysuckle	Stigmasterol	KCNE5
453	honeysuckle	Stigmasterol	PPARD
454	honeysuckle	Stigmasterol	NKX2-1
455	honeysuckle	Stigmasterol	MIP
456	honeysuckle	Stigmasterol	RYR3
457	honeysuckle	Stigmasterol	ZPR1
458	honeysuckle	Stigmasterol	ALDH3B1
459	honeysuckle	Stigmasterol	NPPA
460	honeysuckle	Stigmasterol	STX1A
461	honeysuckle	Stigmasterol	PAXBP1
462	honeysuckle	Stigmasterol	PAX7
463	honeysuckle	Stigmasterol	ALDH3B2
464	honeysuckle	Stigmasterol	RNASE2
465	honeysuckle	Stigmasterol	NRXN2
466	honeysuckle	Stigmasterol	ADORA1
467	honeysuckle	Stigmasterol	ADH4
468	honeysuckle	Stigmasterol	GJA5
469	honeysuckle	Stigmasterol	FAS
470	honeysuckle	Stigmasterol	DAB2IP
471	honeysuckle	Stigmasterol	CYP2E1
472	honeysuckle	Stigmasterol	ACY1
473	honeysuckle	Citronellyl Acetate	ESR1
474	honeysuckle	Citronellyl Acetate	PGR
475	honeysuckle	Citronellyl Acetate	AR
476	honeysuckle	Citronellyl Acetate	NR3C2
477	honeysuckle	Alpha-Terpineol	ESR1
478	honeysuckle	Alpha-Terpineol	PGR
479	honeysuckle	Alpha-Terpineol	WNT4
480	honeysuckle	Alpha-Terpineol	AR
481	honeysuckle	Alpha-Terpineol	NR3C1
482	honeysuckle	Alpha-Terpineol	ANXA1
483	honeysuckle	Alpha-Terpineol	VDR
484	honeysuckle	Alpha-Terpineol	TFAP2C
485	honeysuckle	Alpha-Terpineol	TNFSF11
486	honeysuckle	Alpha-Terpineol	PHB
487	honeysuckle	Alpha-Terpineol	TOX3
488	honeysuckle	Alpha-Terpineol	TGFB1
489	honeysuckle	Alpha-Terpineol	MED1
490	honeysuckle	Alpha-Terpineol	NKX3-1
491	honeysuckle	Alpha-Terpineol	ESR2
492	honeysuckle	Alpha-Terpineol	NEDD4
493	honeysuckle	Alpha-Terpineol	SHH
494	honeysuckle	Alpha-Terpineol	SERPINB3
495	honeysuckle	Alpha-Terpineol	LEF1
496	honeysuckle	Alpha-Terpineol	FGFR2
497	honeysuckle	Alpha-Terpineol	SRC
498	honeysuckle	Alpha-Terpineol	UBR5
499	honeysuckle	Alpha-Terpineol	AREG
500	honeysuckle	Alpha-Terpineol	CD34
501	honeysuckle	Alpha-Terpineol	GPER1
502	honeysuckle	Alpha-Terpineol	WNT5A
503	honeysuckle	Alpha-Terpineol	SOX9
504	honeysuckle	Alpha-Terpineol	PDGFB
505	honeysuckle	Alpha-Terpineol	TRIM24
506	honeysuckle	Caffeicacid	AR
507	honeysuckle	Caffeicacid	IFNG
508	honeysuckle	Caffeicacid	TPMT
509	honeysuckle	Ethyl Linolenate	SLC8A1
510	honeysuckle	Ethyl Linolenate	F12
511	honeysuckle	Ethyl Linolenate	ESR1
512	honeysuckle	Ethyl Linolenate	TRPV1
513	honeysuckle	Ethyl Linolenate	PPARG
514	honeysuckle	Ethyl Linolenate	FFAR1
515	honeysuckle	Ethyl Linolenate	PTGER4
516	honeysuckle	Ethyl Linolenate	PGR
517	honeysuckle	Ethyl Linolenate	AR
518	honeysuckle	Ethyl Linolenate	FADS2
519	honeysuckle	Ethyl Linolenate	FADS1
520	honeysuckle	Ethyl Linolenate	PPARD
521	honeysuckle	Ethyl Linolenate	PTGER2
522	honeysuckle	Ethyl Linolenate	PTGS1
523	honeysuckle	Ethyl Linolenate	ACSL4
524	honeysuckle	Ethyl Linolenate	PTGER3
525	honeysuckle	Ethyl Linolenate	PTGS2
526	honeysuckle	Ethyl Linolenate	ELOVL4
527	honeysuckle	Ethyl Linolenate	CYP19A1
528	honeysuckle	Ethyl Linolenate	ACSL3
529	honeysuckle	Ethyl Linolenate	NR3C2
530	honeysuckle	Insularine	ACHE
531	honeysuckle	Insularine	CHRNA2
532	honeysuckle	Insularine	HTR3A
533	honeysuckle	Insularine	CHRM2
534	honeysuckle	Insularine	CYBA
535	honeysuckle	Insularine	CHRNA4
536	honeysuckle	Insularine	RAC2
537	honeysuckle	Insularine	RAC1
538	honeysuckle	Insularine	OPRD1
539	honeysuckle	Insularine	NCF4
540	honeysuckle	Insularine	CHRNA7
541	honeysuckle	Insularine	CYBB
542	honeysuckle	Insularine	NCF1
543	honeysuckle	Insularine	SIGMAR1
544	honeysuckle	Insularine	NCF2
545	honeysuckle	Insularine	OPRK1
546	honeysuckle	Insularine	CHRNA3
547	honeysuckle	Insularine	RAC3
548	honeysuckle	Insularine	CHRNB2
549	honeysuckle	Insularine	SLC6A4
550	honeysuckle	Insularine	OPRM1
551	honeysuckle	Insularine	PGRMC1
552	honeysuckle	Insularine	GRIN3A
553	honeysuckle	Insularine	CHRFAM7A
554	honeysuckle	Insularine	CHRNB4
555	honeysuckle	Insularine	SLC6A2
556	honeysuckle	Insularine	TLR4
557	honeysuckle	Insularine	ELANE
558	honeysuckle	Insularine	CTSG
559	honeysuckle	Insularine	SLC18A1
560	honeysuckle	Insularine	CEND1
561	honeysuckle	Insularine	SLC22A1
562	honeysuckle	Insularine	ADRA1B
563	honeysuckle	Insularine	WLS
564	honeysuckle	Insularine	CHRNA9
565	honeysuckle	Benzyl Alcohol	PDE5A
566	honeysuckle	Benzyl Alcohol	PDE4A
567	honeysuckle	Benzyl Alcohol	PDE10A
568	honeysuckle	Benzyl Alcohol	ADA
569	honeysuckle	Benzyl Alcohol	ITFG2
570	honeysuckle	Benzyl Alcohol	DGUOK
571	honeysuckle	Benzyl Alcohol	XDH
572	honeysuckle	Benzyl Alcohol	ADORA1
573	honeysuckle	Benzyl Alcohol	PDE9A
574	honeysuckle	Benzyl Alcohol	NUDT1
575	honeysuckle	Benzyl Alcohol	CD74
576	honeysuckle	Benzyl Alcohol	GUK1
577	honeysuckle	Benzyl Alcohol	PDE3A
578	honeysuckle	Benzyl Alcohol	SIRT2
579	honeysuckle	Benzyl Alcohol	MIF
580	honeysuckle	Benzyl Alcohol	CNTN2
581	honeysuckle	Benzyl Alcohol	DPYD
582	honeysuckle	Benzyl Alcohol	TNFSF13
583	honeysuckle	Benzyl Alcohol	ADK
584	honeysuckle	Benzyl Alcohol	ITPA
585	honeysuckle	Benzyl Alcohol	PIK3CG
586	honeysuckle	Benzyl Alcohol	PRPS1
587	honeysuckle	Benzyl Alcohol	CECR1
588	honeysuckle	Benzyl Alcohol	BCL10
589	honeysuckle	Benzyl Alcohol	ADRBK1
590	honeysuckle	Benzyl Alcohol	PNP
591	honeysuckle	Benzyl Alcohol	APRT
592	honeysuckle	Benzyl Alcohol	AURKA
593	honeysuckle	Benzyl Alcohol	GHRL
594	honeysuckle	Benzyl Alcohol	DRD2
595	honeysuckle	Benzyl Alcohol	PDE1B
596	honeysuckle	Benzyl Alcohol	SAMHD1
597	honeysuckle	Benzyl Alcohol	DERA
598	honeysuckle	Benzyl Alcohol	TNFSF13B
599	honeysuckle	Benzyl Alcohol	CRH
600	honeysuckle	Benzyl Alcohol	ATP1A2
601	honeysuckle	Benzyl Alcohol	TNFRSF13C
602	honeysuckle	Benzyl Alcohol	ATP2A1
603	honeysuckle	Benzyl Alcohol	ADAL
604	honeysuckle	Benzyl Alcohol	ACPP
605	honeysuckle	Benzyl Alcohol	MGEA5
606	honeysuckle	Benzyl Alcohol	DRD1
607	honeysuckle	Benzyl Alcohol	PDE2A
608	honeysuckle	Benzyl Alcohol	NUDT16
609	honeysuckle	Benzyl Alcohol	HPRT1
610	honeysuckle	Benzyl Alcohol	NUDT15
611	honeysuckle	Benzyl Alcohol	PDE11A
612	honeysuckle	Geraniol	RDH11
613	honeysuckle	Geraniol	RBP3
614	honeysuckle	Geraniol	RETSAT
615	honeysuckle	Geraniol	RDH13
616	honeysuckle	Geraniol	DHRS3
617	honeysuckle	Geraniol	RDH5
618	honeysuckle	Geraniol	ALDH1A3
619	honeysuckle	Geraniol	RDH12
620	honeysuckle	Geraniol	DHRS4
621	honeysuckle	Geraniol	RBP1
622	honeysuckle	Geraniol	ALDH1A1
623	honeysuckle	Geraniol	RLBP1
624	honeysuckle	Geraniol	RDH14
625	honeysuckle	Geraniol	RDH8
626	honeysuckle	Geraniol	LRAT
627	honeysuckle	Geraniol	ALDH1A2
628	honeysuckle	Geraniol	ALDH3A1
629	honeysuckle	Geraniol	RHO
630	honeysuckle	Geraniol	RS1
631	honeysuckle	Geraniol	CTSH
632	honeysuckle	Geraniol	OPN4
633	honeysuckle	Geraniol	RDH10
634	honeysuckle	Geraniol	ALDH8A1
635	honeysuckle	Geraniol	SHBG
636	honeysuckle	Geraniol	DHRS2
637	honeysuckle	Geraniol	HSD17B7
638	honeysuckle	Geraniol	AR
639	honeysuckle	Geraniol	THRA
640	honeysuckle	Geraniol	PAX2
641	honeysuckle	Geraniol	CBR3
642	honeysuckle	Geraniol	GATA3
643	honeysuckle	Geraniol	ASCL1
644	honeysuckle	Geraniol	DLX5
645	honeysuckle	Geraniol	RET
646	honeysuckle	Geraniol	THRB
647	honeysuckle	Geraniol	CRYM
648	honeysuckle	Geraniol	TSPO
649	honeysuckle	Geraniol	OPN5
650	honeysuckle	Geraniol	DHRS9
651	honeysuckle	Geraniol	CBR1
652	honeysuckle	Geraniol	CYP1A1
653	honeysuckle	Ethyl Palmitate	AR
654	honeysuckle	Ethyl Palmitate	NPR1
655	honeysuckle	Ethyl Palmitate	CHRM1
656	honeysuckle	Ethyl Palmitate	AKR1D1
657	honeysuckle	Ethyl Palmitate	TYR
658	honeysuckle	Ethyl Palmitate	SRD5A2
659	honeysuckle	Ethyl Palmitate	CHRM2
660	honeysuckle	Ethyl Palmitate	NPR3
661	honeysuckle	Ethyl Palmitate	NPR2
662	honeysuckle	Dibutyl Phthalate	SCN10A
663	honeysuckle	Dibutyl Phthalate	ACHE
664	honeysuckle	Dibutyl Phthalate	BCHE
665	honeysuckle	Dibutyl Phthalate	COLQ
666	honeysuckle	Dibutyl Phthalate	SLC5A7
667	honeysuckle	Dibutyl Phthalate	NRG1
668	honeysuckle	Dibutyl Phthalate	DMGDH
669	honeysuckle	Dibutyl Phthalate	SIX3
670	honeysuckle	Dibutyl Phthalate	ANK2
671	honeysuckle	Dibutyl Phthalate	CRP
672	honeysuckle	Dibutyl Phthalate	SCN5A
673	honeysuckle	Dibutyl Phthalate	PRSS12
674	honeysuckle	Dibutyl Phthalate	SLC44A4
675	honeysuckle	Dibutyl Phthalate	ALDH7A1
676	honeysuckle	Dibutyl Phthalate	DNM3
677	honeysuckle	Dibutyl Phthalate	SCN4B
678	honeysuckle	Dibutyl Phthalate	ASCL1
679	honeysuckle	Dibutyl Phthalate	ENPP6
680	honeysuckle	Dibutyl Phthalate	CDH8
681	honeysuckle	Dibutyl Phthalate	KCNA5
682	honeysuckle	Dibutyl Phthalate	FNTA
683	honeysuckle	Dibutyl Phthalate	AGRN
684	honeysuckle	Dibutyl Phthalate	CHKA
685	honeysuckle	Dibutyl Phthalate	RYR2
686	honeysuckle	Dibutyl Phthalate	CHDH
687	honeysuckle	Dibutyl Phthalate	GJA5
688	honeysuckle	Dibutyl Phthalate	GRIN1
689	honeysuckle	Hederagenin	SRD5A1
690	honeysuckle	Hederagenin	CYP17A1
691	honeysuckle	Hederagenin	SLC8A1
692	honeysuckle	Hederagenin	F12
693	honeysuckle	Hederagenin	PRLR
694	honeysuckle	Hederagenin	ESR1
695	honeysuckle	Hederagenin	TRPV1
696	honeysuckle	Hederagenin	PTGER1
697	honeysuckle	Hederagenin	PTGER4
698	honeysuckle	Hederagenin	PGR
699	honeysuckle	Hederagenin	AR
700	honeysuckle	Hederagenin	NR3C1
701	honeysuckle	Hederagenin	OPRK1
702	honeysuckle	Hederagenin	FADS2
703	honeysuckle	Hederagenin	FADS1
704	honeysuckle	Hederagenin	PTGER2
705	honeysuckle	Hederagenin	PTGS1
706	honeysuckle	Hederagenin	PTGER3
707	honeysuckle	Hederagenin	PTGS2
708	honeysuckle	Hederagenin	ELOVL4
709	honeysuckle	Hederagenin	ANXA1
710	honeysuckle	Hederagenin	NR3C2
711	honeysuckle	Caffeic Acid	AR
712	honeysuckle	Caffeic Acid	IFNG
713	honeysuckle	Caffeic Acid	TPMT
714	honeysuckle	3-Methyl-2-(2-Pentenyl)-2-Cyclopenten-1-One	PDE7B
715	honeysuckle	3-Methyl-2-(2-Pentenyl)-2-Cyclopenten-1-One	PDE5A
716	honeysuckle	3-Methyl-2-(2-Pentenyl)-2-Cyclopenten-1-One	PDE9A
717	honeysuckle	3-Methyl-2-(2-Pentenyl)-2-Cyclopenten-1-One	PDE4A
718	honeysuckle	3-Methyl-2-(2-Pentenyl)-2-Cyclopenten-1-One	RYR1
719	honeysuckle	3-Methyl-2-(2-Pentenyl)-2-Cyclopenten-1-One	CYP17A1
720	honeysuckle	3-Methyl-2-(2-Pentenyl)-2-Cyclopenten-1-One	PDE3A
721	honeysuckle	3-Methyl-2-(2-Pentenyl)-2-Cyclopenten-1-One	ADORA2A
722	honeysuckle	3-Methyl-2-(2-Pentenyl)-2-Cyclopenten-1-One	ITPR1
723	honeysuckle	3-Methyl-2-(2-Pentenyl)-2-Cyclopenten-1-One	PDE6A
724	honeysuckle	3-Methyl-2-(2-Pentenyl)-2-Cyclopenten-1-One	PRKDC
725	honeysuckle	3-Methyl-2-(2-Pentenyl)-2-Cyclopenten-1-One	PIK3CD
726	honeysuckle	3-Methyl-2-(2-Pentenyl)-2-Cyclopenten-1-One	ESR1
727	honeysuckle	3-Methyl-2-(2-Pentenyl)-2-Cyclopenten-1-One	PDE3B
728	honeysuckle	3-Methyl-2-(2-Pentenyl)-2-Cyclopenten-1-One	PGD
729	honeysuckle	3-Methyl-2-(2-Pentenyl)-2-Cyclopenten-1-One	PIK3CA
730	honeysuckle	3-Methyl-2-(2-Pentenyl)-2-Cyclopenten-1-One	ADORA2B
731	honeysuckle	3-Methyl-2-(2-Pentenyl)-2-Cyclopenten-1-One	PDE1A
732	honeysuckle	3-Methyl-2-(2-Pentenyl)-2-Cyclopenten-1-One	PDE4D
733	honeysuckle	3-Methyl-2-(2-Pentenyl)-2-Cyclopenten-1-One	PGR
734	honeysuckle	3-Methyl-2-(2-Pentenyl)-2-Cyclopenten-1-One	PIK3CB
735	honeysuckle	3-Methyl-2-(2-Pentenyl)-2-Cyclopenten-1-One	ITPR2
736	honeysuckle	3-Methyl-2-(2-Pentenyl)-2-Cyclopenten-1-One	PDE1B
737	honeysuckle	3-Methyl-2-(2-Pentenyl)-2-Cyclopenten-1-One	OPRK1
738	honeysuckle	3-Methyl-2-(2-Pentenyl)-2-Cyclopenten-1-One	PDE7A
739	honeysuckle	3-Methyl-2-(2-Pentenyl)-2-Cyclopenten-1-One	ITPR3
740	honeysuckle	3-Methyl-2-(2-Pentenyl)-2-Cyclopenten-1-One	POLA2
741	honeysuckle	3-Methyl-2-(2-Pentenyl)-2-Cyclopenten-1-One	PDE4C
742	honeysuckle	3-Methyl-2-(2-Pentenyl)-2-Cyclopenten-1-One	PDE10A
743	honeysuckle	3-Methyl-2-(2-Pentenyl)-2-Cyclopenten-1-One	PDE1C
744	honeysuckle	3-Methyl-2-(2-Pentenyl)-2-Cyclopenten-1-One	ATM
745	honeysuckle	3-Methyl-2-(2-Pentenyl)-2-Cyclopenten-1-One	PDE6B
746	honeysuckle	3-Methyl-2-(2-Pentenyl)-2-Cyclopenten-1-One	PDE4B
747	honeysuckle	3-Methyl-2-(2-Pentenyl)-2-Cyclopenten-1-One	PDE2A
748	honeysuckle	3-Methyl-2-(2-Pentenyl)-2-Cyclopenten-1-One	ADORA1
749	honeysuckle	3-Methyl-2-(2-Pentenyl)-2-Cyclopenten-1-One	CYP19A1
750	honeysuckle	3-Methyl-2-(2-Pentenyl)-2-Cyclopenten-1-One	PDE8B
751	honeysuckle	3-Methyl-2-(2-Pentenyl)-2-Cyclopenten-1-One	NT5E
752	honeysuckle	3-Methyl-2-(2-Pentenyl)-2-Cyclopenten-1-One	HDAC2
753	honeysuckle	3-Methyl-2-(2-Pentenyl)-2-Cyclopenten-1-One	PDE6C
754	honeysuckle	3-Methyl-2-(2-Pentenyl)-2-Cyclopenten-1-One	PDE11A
755	honeysuckle	3-Methyl-2-(2-Pentenyl)-2-Cyclopenten-1-One	PDE8A
756	honeysuckle	3-Methyl-2-(2-Pentenyl)-2-Cyclopenten-1-One	NR3C2
757	honeysuckle	3-Methyl-2-(2-Pentenyl)-2-Cyclopenten-1-One	RINT1
758	honeysuckle	3-Methyl-2-(2-Pentenyl)-2-Cyclopenten-1-One	RIPK1
759	honeysuckle	3-Methyl-2-(2-Pentenyl)-2-Cyclopenten-1-One	PIK3R1
760	honeysuckle	3-Methyl-2-(2-Pentenyl)-2-Cyclopenten-1-One	WNT4
761	honeysuckle	3-Methyl-2-(2-Pentenyl)-2-Cyclopenten-1-One	TACR2
762	honeysuckle	3-Methyl-2-(2-Pentenyl)-2-Cyclopenten-1-One	AMPD3
763	honeysuckle	3-Methyl-2-(2-Pentenyl)-2-Cyclopenten-1-One	CX3CR1
764	honeysuckle	3-Methyl-2-(2-Pentenyl)-2-Cyclopenten-1-One	ADA
765	honeysuckle	3-Methyl-2-(2-Pentenyl)-2-Cyclopenten-1-One	HAP1
766	honeysuckle	3-Methyl-2-(2-Pentenyl)-2-Cyclopenten-1-One	IDNK
767	honeysuckle	3-Methyl-2-(2-Pentenyl)-2-Cyclopenten-1-One	SLC8A1
768	honeysuckle	3-Methyl-2-(2-Pentenyl)-2-Cyclopenten-1-One	TRPV1
769	honeysuckle	3-Methyl-2-(2-Pentenyl)-2-Cyclopenten-1-One	FADS2
770	honeysuckle	3-Methyl-2-(2-Pentenyl)-2-Cyclopenten-1-One	FADS1
771	honeysuckle	3-Methyl-2-(2-Pentenyl)-2-Cyclopenten-1-One	PTGS1
772	honeysuckle	3-Methyl-2-(2-Pentenyl)-2-Cyclopenten-1-One	PTGS2
773	honeysuckle	3-Methyl-2-(2-Pentenyl)-2-Cyclopenten-1-One	ELOVL4
774	honeysuckle	3-Methyl-2-(2-Pentenyl)-2-Cyclopenten-1-One	HDAC1
775	honeysuckle	3-Methyl-2-(2-Pentenyl)-2-Cyclopenten-1-One	TFAP2C
776	honeysuckle	3-Methyl-2-(2-Pentenyl)-2-Cyclopenten-1-One	HMGA2
777	honeysuckle	3-Methyl-2-(2-Pentenyl)-2-Cyclopenten-1-One	TNFSF11
778	honeysuckle	3-Methyl-2-(2-Pentenyl)-2-Cyclopenten-1-One	NT5C1A
779	honeysuckle	3-Methyl-2-(2-Pentenyl)-2-Cyclopenten-1-One	ACTN3
780	honeysuckle	3-Methyl-2-(2-Pentenyl)-2-Cyclopenten-1-One	NOS1AP
781	honeysuckle	3-Methyl-2-(2-Pentenyl)-2-Cyclopenten-1-One	TAC1
782	honeysuckle	3-Methyl-2-(2-Pentenyl)-2-Cyclopenten-1-One	PHB
783	honeysuckle	3-Methyl-2-(2-Pentenyl)-2-Cyclopenten-1-One	SIRT1
784	honeysuckle	3-Methyl-2-(2-Pentenyl)-2-Cyclopenten-1-One	DGKI
785	honeysuckle	3-Methyl-2-(2-Pentenyl)-2-Cyclopenten-1-One	FKBP1A
786	honeysuckle	3-Methyl-2-(2-Pentenyl)-2-Cyclopenten-1-One	FURIN
787	honeysuckle	3-Methyl-2-(2-Pentenyl)-2-Cyclopenten-1-One	TOX3
788	honeysuckle	3-Methyl-2-(2-Pentenyl)-2-Cyclopenten-1-One	UTS2
789	honeysuckle	3-Methyl-2-(2-Pentenyl)-2-Cyclopenten-1-One	STUB1
790	honeysuckle	3-Methyl-2-(2-Pentenyl)-2-Cyclopenten-1-One	CTR9
791	honeysuckle	3-Methyl-2-(2-Pentenyl)-2-Cyclopenten-1-One	G6PD
792	honeysuckle	3-Methyl-2-(2-Pentenyl)-2-Cyclopenten-1-One	GNAT1
793	honeysuckle	3-Methyl-2-(2-Pentenyl)-2-Cyclopenten-1-One	SIX1
794	honeysuckle	3-Methyl-2-(2-Pentenyl)-2-Cyclopenten-1-One	QDPR
795	honeysuckle	3-Methyl-2-(2-Pentenyl)-2-Cyclopenten-1-One	TGFB1
796	honeysuckle	3-Methyl-2-(2-Pentenyl)-2-Cyclopenten-1-One	ATP11C
797	honeysuckle	3-Methyl-2-(2-Pentenyl)-2-Cyclopenten-1-One	KHDRBS1
798	honeysuckle	3-Methyl-2-(2-Pentenyl)-2-Cyclopenten-1-One	PPP3CB
799	honeysuckle	3-Methyl-2-(2-Pentenyl)-2-Cyclopenten-1-One	SYT2
800	honeysuckle	3-Methyl-2-(2-Pentenyl)-2-Cyclopenten-1-One	SIX4
801	honeysuckle	3-Methyl-2-(2-Pentenyl)-2-Cyclopenten-1-One	SIRT2
802	honeysuckle	3-Methyl-2-(2-Pentenyl)-2-Cyclopenten-1-One	SPI1
803	honeysuckle	3-Methyl-2-(2-Pentenyl)-2-Cyclopenten-1-One	HOMER1
804	honeysuckle	3-Methyl-2-(2-Pentenyl)-2-Cyclopenten-1-One	SHANK3
805	honeysuckle	3-Methyl-2-(2-Pentenyl)-2-Cyclopenten-1-One	TAS1R1
806	honeysuckle	3-Methyl-2-(2-Pentenyl)-2-Cyclopenten-1-One	TRIM28
807	honeysuckle	3-Methyl-2-(2-Pentenyl)-2-Cyclopenten-1-One	XRCC4
808	honeysuckle	3-Methyl-2-(2-Pentenyl)-2-Cyclopenten-1-One	MED1
809	honeysuckle	3-Methyl-2-(2-Pentenyl)-2-Cyclopenten-1-One	NKX3-1
810	honeysuckle	3-Methyl-2-(2-Pentenyl)-2-Cyclopenten-1-One	UBE2B
811	honeysuckle	3-Methyl-2-(2-Pentenyl)-2-Cyclopenten-1-One	ESR2
812	honeysuckle	3-Methyl-2-(2-Pentenyl)-2-Cyclopenten-1-One	HCN4
813	honeysuckle	3-Methyl-2-(2-Pentenyl)-2-Cyclopenten-1-One	EDN1
814	honeysuckle	3-Methyl-2-(2-Pentenyl)-2-Cyclopenten-1-One	CACNA1A
815	honeysuckle	3-Methyl-2-(2-Pentenyl)-2-Cyclopenten-1-One	STAT5A
816	honeysuckle	3-Methyl-2-(2-Pentenyl)-2-Cyclopenten-1-One	TP53
817	honeysuckle	3-Methyl-2-(2-Pentenyl)-2-Cyclopenten-1-One	GNAT3
818	honeysuckle	3-Methyl-2-(2-Pentenyl)-2-Cyclopenten-1-One	HELB
819	honeysuckle	3-Methyl-2-(2-Pentenyl)-2-Cyclopenten-1-One	COMT
820	honeysuckle	3-Methyl-2-(2-Pentenyl)-2-Cyclopenten-1-One	SLC26A6
821	honeysuckle	3-Methyl-2-(2-Pentenyl)-2-Cyclopenten-1-One	ADRA2A
822	honeysuckle	3-Methyl-2-(2-Pentenyl)-2-Cyclopenten-1-One	YWHAE
823	honeysuckle	3-Methyl-2-(2-Pentenyl)-2-Cyclopenten-1-One	CETN2
824	honeysuckle	3-Methyl-2-(2-Pentenyl)-2-Cyclopenten-1-One	POLA1
825	honeysuckle	3-Methyl-2-(2-Pentenyl)-2-Cyclopenten-1-One	CRP
826	honeysuckle	3-Methyl-2-(2-Pentenyl)-2-Cyclopenten-1-One	CETN1
827	honeysuckle	3-Methyl-2-(2-Pentenyl)-2-Cyclopenten-1-One	NUDT9
828	honeysuckle	3-Methyl-2-(2-Pentenyl)-2-Cyclopenten-1-One	PIK3CG
829	honeysuckle	3-Methyl-2-(2-Pentenyl)-2-Cyclopenten-1-One	BMP2
830	honeysuckle	3-Methyl-2-(2-Pentenyl)-2-Cyclopenten-1-One	TNF
831	honeysuckle	3-Methyl-2-(2-Pentenyl)-2-Cyclopenten-1-One	NEDD4
832	honeysuckle	3-Methyl-2-(2-Pentenyl)-2-Cyclopenten-1-One	AGT
833	honeysuckle	3-Methyl-2-(2-Pentenyl)-2-Cyclopenten-1-One	FER
834	honeysuckle	3-Methyl-2-(2-Pentenyl)-2-Cyclopenten-1-One	SHH
835	honeysuckle	3-Methyl-2-(2-Pentenyl)-2-Cyclopenten-1-One	SERPINB3
836	honeysuckle	3-Methyl-2-(2-Pentenyl)-2-Cyclopenten-1-One	FOXP3
837	honeysuckle	3-Methyl-2-(2-Pentenyl)-2-Cyclopenten-1-One	CXCL13
838	honeysuckle	3-Methyl-2-(2-Pentenyl)-2-Cyclopenten-1-One	ARID1A
839	honeysuckle	3-Methyl-2-(2-Pentenyl)-2-Cyclopenten-1-One	FGF10
840	honeysuckle	3-Methyl-2-(2-Pentenyl)-2-Cyclopenten-1-One	KCNB1
841	honeysuckle	3-Methyl-2-(2-Pentenyl)-2-Cyclopenten-1-One	LEF1
842	honeysuckle	3-Methyl-2-(2-Pentenyl)-2-Cyclopenten-1-One	PTK2B
843	honeysuckle	3-Methyl-2-(2-Pentenyl)-2-Cyclopenten-1-One	LIG4
844	honeysuckle	3-Methyl-2-(2-Pentenyl)-2-Cyclopenten-1-One	ADRBK1
845	honeysuckle	3-Methyl-2-(2-Pentenyl)-2-Cyclopenten-1-One	MAOB
846	honeysuckle	3-Methyl-2-(2-Pentenyl)-2-Cyclopenten-1-One	SORCS3
847	honeysuckle	3-Methyl-2-(2-Pentenyl)-2-Cyclopenten-1-One	ADRB1
848	honeysuckle	3-Methyl-2-(2-Pentenyl)-2-Cyclopenten-1-One	ADAM8
849	honeysuckle	3-Methyl-2-(2-Pentenyl)-2-Cyclopenten-1-One	VTI1A
850	honeysuckle	3-Methyl-2-(2-Pentenyl)-2-Cyclopenten-1-One	SLC44A4
851	honeysuckle	3-Methyl-2-(2-Pentenyl)-2-Cyclopenten-1-One	ADAP2
852	honeysuckle	3-Methyl-2-(2-Pentenyl)-2-Cyclopenten-1-One	LRRC8A
853	honeysuckle	3-Methyl-2-(2-Pentenyl)-2-Cyclopenten-1-One	FGFR2
854	honeysuckle	3-Methyl-2-(2-Pentenyl)-2-Cyclopenten-1-One	AURKA
855	honeysuckle	3-Methyl-2-(2-Pentenyl)-2-Cyclopenten-1-One	MCM3
856	honeysuckle	3-Methyl-2-(2-Pentenyl)-2-Cyclopenten-1-One	VCP
857	honeysuckle	3-Methyl-2-(2-Pentenyl)-2-Cyclopenten-1-One	GHRL
858	honeysuckle	3-Methyl-2-(2-Pentenyl)-2-Cyclopenten-1-One	BCL11B
859	honeysuckle	3-Methyl-2-(2-Pentenyl)-2-Cyclopenten-1-One	BCL2
860	honeysuckle	3-Methyl-2-(2-Pentenyl)-2-Cyclopenten-1-One	2022-03-08
861	honeysuckle	3-Methyl-2-(2-Pentenyl)-2-Cyclopenten-1-One	GAS6
862	honeysuckle	3-Methyl-2-(2-Pentenyl)-2-Cyclopenten-1-One	C5
863	honeysuckle	3-Methyl-2-(2-Pentenyl)-2-Cyclopenten-1-One	SREBF1
864	honeysuckle	3-Methyl-2-(2-Pentenyl)-2-Cyclopenten-1-One	DRD2
865	honeysuckle	3-Methyl-2-(2-Pentenyl)-2-Cyclopenten-1-One	PLN
866	honeysuckle	3-Methyl-2-(2-Pentenyl)-2-Cyclopenten-1-One	DNM3
867	honeysuckle	3-Methyl-2-(2-Pentenyl)-2-Cyclopenten-1-One	CHRNA3
868	honeysuckle	3-Methyl-2-(2-Pentenyl)-2-Cyclopenten-1-One	TCF3
869	honeysuckle	3-Methyl-2-(2-Pentenyl)-2-Cyclopenten-1-One	SRC
870	honeysuckle	3-Methyl-2-(2-Pentenyl)-2-Cyclopenten-1-One	LONP1
871	honeysuckle	3-Methyl-2-(2-Pentenyl)-2-Cyclopenten-1-One	XCL1
872	honeysuckle	3-Methyl-2-(2-Pentenyl)-2-Cyclopenten-1-One	HSP90AB1
873	honeysuckle	3-Methyl-2-(2-Pentenyl)-2-Cyclopenten-1-One	HIBADH
874	honeysuckle	3-Methyl-2-(2-Pentenyl)-2-Cyclopenten-1-One	STAP1
875	honeysuckle	3-Methyl-2-(2-Pentenyl)-2-Cyclopenten-1-One	HRC
876	honeysuckle	3-Methyl-2-(2-Pentenyl)-2-Cyclopenten-1-One	UTS2R
877	honeysuckle	3-Methyl-2-(2-Pentenyl)-2-Cyclopenten-1-One	SLC6A4
878	honeysuckle	3-Methyl-2-(2-Pentenyl)-2-Cyclopenten-1-One	HMGCR
879	honeysuckle	3-Methyl-2-(2-Pentenyl)-2-Cyclopenten-1-One	HIPK2
880	honeysuckle	3-Methyl-2-(2-Pentenyl)-2-Cyclopenten-1-One	PPP3CA
881	honeysuckle	3-Methyl-2-(2-Pentenyl)-2-Cyclopenten-1-One	RAPGEF2
882	honeysuckle	3-Methyl-2-(2-Pentenyl)-2-Cyclopenten-1-One	TET1
883	honeysuckle	3-Methyl-2-(2-Pentenyl)-2-Cyclopenten-1-One	C2CD5
884	honeysuckle	3-Methyl-2-(2-Pentenyl)-2-Cyclopenten-1-One	CSF2
885	honeysuckle	3-Methyl-2-(2-Pentenyl)-2-Cyclopenten-1-One	TALDO1
886	honeysuckle	3-Methyl-2-(2-Pentenyl)-2-Cyclopenten-1-One	BDKRB2
887	honeysuckle	3-Methyl-2-(2-Pentenyl)-2-Cyclopenten-1-One	KCNH2
888	honeysuckle	3-Methyl-2-(2-Pentenyl)-2-Cyclopenten-1-One	MMP28
889	honeysuckle	3-Methyl-2-(2-Pentenyl)-2-Cyclopenten-1-One	HIF1A
890	honeysuckle	3-Methyl-2-(2-Pentenyl)-2-Cyclopenten-1-One	KIT
891	honeysuckle	3-Methyl-2-(2-Pentenyl)-2-Cyclopenten-1-One	INS
892	honeysuckle	3-Methyl-2-(2-Pentenyl)-2-Cyclopenten-1-One	MTOR
893	honeysuckle	3-Methyl-2-(2-Pentenyl)-2-Cyclopenten-1-One	WNT10B
894	honeysuckle	3-Methyl-2-(2-Pentenyl)-2-Cyclopenten-1-One	SLC18A3
895	honeysuckle	3-Methyl-2-(2-Pentenyl)-2-Cyclopenten-1-One	ABCC4
896	honeysuckle	3-Methyl-2-(2-Pentenyl)-2-Cyclopenten-1-One	BNIP3
897	honeysuckle	3-Methyl-2-(2-Pentenyl)-2-Cyclopenten-1-One	ZFPM1
898	honeysuckle	3-Methyl-2-(2-Pentenyl)-2-Cyclopenten-1-One	GATA3
899	honeysuckle	3-Methyl-2-(2-Pentenyl)-2-Cyclopenten-1-One	UBR5
900	honeysuckle	3-Methyl-2-(2-Pentenyl)-2-Cyclopenten-1-One	AREG
901	honeysuckle	3-Methyl-2-(2-Pentenyl)-2-Cyclopenten-1-One	CRH
902	honeysuckle	3-Methyl-2-(2-Pentenyl)-2-Cyclopenten-1-One	ZFP42
903	honeysuckle	3-Methyl-2-(2-Pentenyl)-2-Cyclopenten-1-One	PIK3R6
904	honeysuckle	3-Methyl-2-(2-Pentenyl)-2-Cyclopenten-1-One	PF4
905	honeysuckle	3-Methyl-2-(2-Pentenyl)-2-Cyclopenten-1-One	ATP1A2
906	honeysuckle	3-Methyl-2-(2-Pentenyl)-2-Cyclopenten-1-One	AVPR2
907	honeysuckle	3-Methyl-2-(2-Pentenyl)-2-Cyclopenten-1-One	CAMK2D
908	honeysuckle	3-Methyl-2-(2-Pentenyl)-2-Cyclopenten-1-One	ADRA1B
909	honeysuckle	3-Methyl-2-(2-Pentenyl)-2-Cyclopenten-1-One	IL10
910	honeysuckle	3-Methyl-2-(2-Pentenyl)-2-Cyclopenten-1-One	NEFL
911	honeysuckle	3-Methyl-2-(2-Pentenyl)-2-Cyclopenten-1-One	UCN2
912	honeysuckle	3-Methyl-2-(2-Pentenyl)-2-Cyclopenten-1-One	ATP1A1
913	honeysuckle	3-Methyl-2-(2-Pentenyl)-2-Cyclopenten-1-One	RYR3
914	honeysuckle	3-Methyl-2-(2-Pentenyl)-2-Cyclopenten-1-One	PPP3R1
915	honeysuckle	3-Methyl-2-(2-Pentenyl)-2-Cyclopenten-1-One	SPX
916	honeysuckle	3-Methyl-2-(2-Pentenyl)-2-Cyclopenten-1-One	ATP2A1
917	honeysuckle	3-Methyl-2-(2-Pentenyl)-2-Cyclopenten-1-One	SMO
918	honeysuckle	3-Methyl-2-(2-Pentenyl)-2-Cyclopenten-1-One	RAG1
919	honeysuckle	3-Methyl-2-(2-Pentenyl)-2-Cyclopenten-1-One	RAB8B
920	honeysuckle	3-Methyl-2-(2-Pentenyl)-2-Cyclopenten-1-One	DKK3
921	honeysuckle	3-Methyl-2-(2-Pentenyl)-2-Cyclopenten-1-One	AHCYL1
922	honeysuckle	3-Methyl-2-(2-Pentenyl)-2-Cyclopenten-1-One	AQP1
923	honeysuckle	3-Methyl-2-(2-Pentenyl)-2-Cyclopenten-1-One	TNFAIP3
924	honeysuckle	3-Methyl-2-(2-Pentenyl)-2-Cyclopenten-1-One	TAC4
925	honeysuckle	3-Methyl-2-(2-Pentenyl)-2-Cyclopenten-1-One	DPPA3
926	honeysuckle	3-Methyl-2-(2-Pentenyl)-2-Cyclopenten-1-One	CASQ1
927	honeysuckle	3-Methyl-2-(2-Pentenyl)-2-Cyclopenten-1-One	FKBP1B
928	honeysuckle	3-Methyl-2-(2-Pentenyl)-2-Cyclopenten-1-One	CDC42
929	honeysuckle	3-Methyl-2-(2-Pentenyl)-2-Cyclopenten-1-One	IL4
930	honeysuckle	3-Methyl-2-(2-Pentenyl)-2-Cyclopenten-1-One	POLB
931	honeysuckle	3-Methyl-2-(2-Pentenyl)-2-Cyclopenten-1-One	IDO1
932	honeysuckle	3-Methyl-2-(2-Pentenyl)-2-Cyclopenten-1-One	ATP2B4
933	honeysuckle	3-Methyl-2-(2-Pentenyl)-2-Cyclopenten-1-One	CTNNB1
934	honeysuckle	3-Methyl-2-(2-Pentenyl)-2-Cyclopenten-1-One	PGLS
935	honeysuckle	3-Methyl-2-(2-Pentenyl)-2-Cyclopenten-1-One	SLC9A3R1
936	honeysuckle	3-Methyl-2-(2-Pentenyl)-2-Cyclopenten-1-One	IGF2
937	honeysuckle	3-Methyl-2-(2-Pentenyl)-2-Cyclopenten-1-One	HPS4
938	honeysuckle	3-Methyl-2-(2-Pentenyl)-2-Cyclopenten-1-One	TKT
939	honeysuckle	3-Methyl-2-(2-Pentenyl)-2-Cyclopenten-1-One	DRD1
940	honeysuckle	3-Methyl-2-(2-Pentenyl)-2-Cyclopenten-1-One	ADAP1
941	honeysuckle	3-Methyl-2-(2-Pentenyl)-2-Cyclopenten-1-One	EDA
942	honeysuckle	3-Methyl-2-(2-Pentenyl)-2-Cyclopenten-1-One	RYR2
943	honeysuckle	3-Methyl-2-(2-Pentenyl)-2-Cyclopenten-1-One	CD34
944	honeysuckle	3-Methyl-2-(2-Pentenyl)-2-Cyclopenten-1-One	HSP90AA1
945	honeysuckle	3-Methyl-2-(2-Pentenyl)-2-Cyclopenten-1-One	LTA
946	honeysuckle	3-Methyl-2-(2-Pentenyl)-2-Cyclopenten-1-One	SPR
947	honeysuckle	3-Methyl-2-(2-Pentenyl)-2-Cyclopenten-1-One	GPER1
948	honeysuckle	3-Methyl-2-(2-Pentenyl)-2-Cyclopenten-1-One	CBFA2T3
949	honeysuckle	3-Methyl-2-(2-Pentenyl)-2-Cyclopenten-1-One	CALHM1
950	honeysuckle	3-Methyl-2-(2-Pentenyl)-2-Cyclopenten-1-One	WNT5A
951	honeysuckle	3-Methyl-2-(2-Pentenyl)-2-Cyclopenten-1-One	SELP
952	honeysuckle	3-Methyl-2-(2-Pentenyl)-2-Cyclopenten-1-One	XRCC6BP1
953	honeysuckle	3-Methyl-2-(2-Pentenyl)-2-Cyclopenten-1-One	PARP10
954	honeysuckle	3-Methyl-2-(2-Pentenyl)-2-Cyclopenten-1-One	HPRT1
955	honeysuckle	3-Methyl-2-(2-Pentenyl)-2-Cyclopenten-1-One	AMICA1
956	honeysuckle	3-Methyl-2-(2-Pentenyl)-2-Cyclopenten-1-One	TAS1R3
957	honeysuckle	3-Methyl-2-(2-Pentenyl)-2-Cyclopenten-1-One	NOS1
958	honeysuckle	3-Methyl-2-(2-Pentenyl)-2-Cyclopenten-1-One	TREM1
959	honeysuckle	3-Methyl-2-(2-Pentenyl)-2-Cyclopenten-1-One	TAL1
960	honeysuckle	3-Methyl-2-(2-Pentenyl)-2-Cyclopenten-1-One	ALAD
961	honeysuckle	3-Methyl-2-(2-Pentenyl)-2-Cyclopenten-1-One	PAWR
962	honeysuckle	3-Methyl-2-(2-Pentenyl)-2-Cyclopenten-1-One	SOX9
963	honeysuckle	3-Methyl-2-(2-Pentenyl)-2-Cyclopenten-1-One	BMP5
964	honeysuckle	3-Methyl-2-(2-Pentenyl)-2-Cyclopenten-1-One	PDGFB
965	honeysuckle	3-Methyl-2-(2-Pentenyl)-2-Cyclopenten-1-One	RTN2
966	honeysuckle	3-Methyl-2-(2-Pentenyl)-2-Cyclopenten-1-One	CD63
967	honeysuckle	3-Methyl-2-(2-Pentenyl)-2-Cyclopenten-1-One	CAMK2G
968	honeysuckle	3-Methyl-2-(2-Pentenyl)-2-Cyclopenten-1-One	LAMP2
969	honeysuckle	3-Methyl-2-(2-Pentenyl)-2-Cyclopenten-1-One	NEFH
970	honeysuckle	3-Methyl-2-(2-Pentenyl)-2-Cyclopenten-1-One	GLYR1
971	honeysuckle	3-Methyl-2-(2-Pentenyl)-2-Cyclopenten-1-One	VDR
972	honeysuckle	3-Methyl-2-(2-Pentenyl)-2-Cyclopenten-1-One	GNAS
973	honeysuckle	3-Methyl-2-(2-Pentenyl)-2-Cyclopenten-1-One	NCBP2
974	honeysuckle	3-Methyl-2-(2-Pentenyl)-2-Cyclopenten-1-One	TPM1
975	honeysuckle	3-Methyl-2-(2-Pentenyl)-2-Cyclopenten-1-One	PIK3R5
976	honeysuckle	3-Methyl-2-(2-Pentenyl)-2-Cyclopenten-1-One	PCSK6
977	honeysuckle	3-Methyl-2-(2-Pentenyl)-2-Cyclopenten-1-One	TRIM24
978	honeysuckle	3-Methyl-2-(2-Pentenyl)-2-Cyclopenten-1-One	REST
979	honeysuckle	3-Methyl-2-(2-Pentenyl)-2-Cyclopenten-1-One	CRHR2
980	honeysuckle	3-Methyl-2-(2-Pentenyl)-2-Cyclopenten-1-One	HCN2
981	honeysuckle	3-Methyl-2-(2-Pentenyl)-2-Cyclopenten-1-One	RAG2
982	honeysuckle	3-Methyl-2-(2-Pentenyl)-2-Cyclopenten-1-One	NFX1
983	honeysuckle	3-Methyl-2-(2-Pentenyl)-2-Cyclopenten-1-One	TAS1R2
984	honeysuckle	Benzyl Benzoate	BCHE
985	honeysuckle	Benzyl Benzoate	SCN10A
986	honeysuckle	Benzyl Benzoate	ACHE
987	honeysuckle	Benzyl Benzoate	COLQ
988	honeysuckle	Benzyl Benzoate	SCN1A
989	honeysuckle	Benzyl Benzoate	GABRB1
990	honeysuckle	Benzyl Benzoate	GLRA2
991	honeysuckle	Benzyl Benzoate	GLRA3
992	honeysuckle	Benzyl Benzoate	GLRB
993	honeysuckle	Benzyl Benzoate	DBH
994	honeysuckle	Benzyl Benzoate	ALDH2
995	honeysuckle	Benzyl Benzoate	GLRA1
996	honeysuckle	Benzyl Benzoate	SLC5A7
997	honeysuckle	Benzyl Benzoate	NRG1
998	honeysuckle	Benzyl Benzoate	DMGDH
999	honeysuckle	Benzyl Benzoate	SIX3
1000	honeysuckle	Benzyl Benzoate	ANK2
1001	honeysuckle	Benzyl Benzoate	CRP
1002	honeysuckle	Benzyl Benzoate	SCN5A
1003	honeysuckle	Benzyl Benzoate	PRSS12
1004	honeysuckle	Benzyl Benzoate	SLC44A4
1005	honeysuckle	Benzyl Benzoate	ALDH7A1
1006	honeysuckle	Benzyl Benzoate	DNM3
1007	honeysuckle	Benzyl Benzoate	SCN4B
1008	honeysuckle	Benzyl Benzoate	ASCL1
1009	honeysuckle	Benzyl Benzoate	ENPP6
1010	honeysuckle	Benzyl Benzoate	CDH8
1011	honeysuckle	Benzyl Benzoate	KCNA5
1012	honeysuckle	Benzyl Benzoate	FNTA
1013	honeysuckle	Benzyl Benzoate	AGRN
1014	honeysuckle	Benzyl Benzoate	CHKA
1015	honeysuckle	Benzyl Benzoate	RYR2
1016	honeysuckle	Benzyl Benzoate	CHDH
1017	honeysuckle	Benzyl Benzoate	GJA5
1018	honeysuckle	Benzyl Benzoate	GRIN1
1019	honeysuckle	Macranthoidin A	GLRA3
1020	honeysuckle	Macranthoidin A	NR3C1
1021	honeysuckle	Macranthoidin A	ATP1A1
1022	honeysuckle	Macranthoidin A	GABRB3
1023	honeysuckle	Nerol	RDH11
1024	honeysuckle	Nerol	RBP3
1025	honeysuckle	Nerol	RETSAT
1026	honeysuckle	Nerol	RDH13
1027	honeysuckle	Nerol	DHRS3
1028	honeysuckle	Nerol	RDH5
1029	honeysuckle	Nerol	ALDH1A3
1030	honeysuckle	Nerol	RDH12
1031	honeysuckle	Nerol	DHRS4
1032	honeysuckle	Nerol	RBP1
1033	honeysuckle	Nerol	ALDH1A1
1034	honeysuckle	Nerol	RLBP1
1035	honeysuckle	Nerol	RDH14
1036	honeysuckle	Nerol	RDH8
1037	honeysuckle	Nerol	LRAT
1038	honeysuckle	Nerol	ALDH1A2
1039	honeysuckle	Nerol	ALDH3A1
1040	honeysuckle	Nerol	RHO
1041	honeysuckle	Nerol	RS1
1042	honeysuckle	Nerol	CTSH
1043	honeysuckle	Nerol	OPN4
1044	honeysuckle	Nerol	RDH10
1045	honeysuckle	Nerol	ALDH8A1
1046	honeysuckle	Nerol	SHBG
1047	honeysuckle	Nerol	DHRS2
1048	honeysuckle	Nerol	HSD17B7
1049	honeysuckle	Nerol	AR
1050	honeysuckle	Nerol	THRA
1051	honeysuckle	Nerol	PAX2
1052	honeysuckle	Nerol	CBR3
1053	honeysuckle	Nerol	GATA3
1054	honeysuckle	Nerol	ASCL1
1055	honeysuckle	Nerol	DLX5
1056	honeysuckle	Nerol	RET
1057	honeysuckle	Nerol	THRB
1058	honeysuckle	Nerol	CRYM
1059	honeysuckle	Nerol	TSPO
1060	honeysuckle	Nerol	OPN5
1061	honeysuckle	Nerol	DHRS9
1062	honeysuckle	Nerol	CBR1
1063	honeysuckle	Nerol	CYP1A1
1064	honeysuckle	Farnesal	ACHE
1065	honeysuckle	Farnesal	BCHE
1066	honeysuckle	Farnesal	COLQ
1067	honeysuckle	Farnesal	SLC5A7
1068	honeysuckle	Farnesal	NRG1
1069	honeysuckle	Farnesal	DMGDH
1070	honeysuckle	Farnesal	SIX3
1071	honeysuckle	Farnesal	CRP
1072	honeysuckle	Farnesal	PRSS12
1073	honeysuckle	Farnesal	SLC44A4
1074	honeysuckle	Farnesal	ALDH7A1
1075	honeysuckle	Farnesal	DNM3
1076	honeysuckle	Farnesal	ASCL1
1077	honeysuckle	Farnesal	ENPP6
1078	honeysuckle	Farnesal	CDH8
1079	honeysuckle	Farnesal	FNTA
1080	honeysuckle	Farnesal	AGRN
1081	honeysuckle	Farnesal	CHKA
1082	honeysuckle	Farnesal	CHDH
1083	honeysuckle	Farnesal	GRIN1
1084	honeysuckle	Delta-Terpineol	ESR1
1085	honeysuckle	Delta-Terpineol	PGR
1086	honeysuckle	Delta-Terpineol	WNT4
1087	honeysuckle	Delta-Terpineol	TRPV3
1088	honeysuckle	Delta-Terpineol	OPRK1
1089	honeysuckle	Delta-Terpineol	TRPM8
1090	honeysuckle	Delta-Terpineol	TRPA1
1091	honeysuckle	Delta-Terpineol	TFAP2C
1092	honeysuckle	Delta-Terpineol	TNFSF11
1093	honeysuckle	Delta-Terpineol	PHB
1094	honeysuckle	Delta-Terpineol	TOX3
1095	honeysuckle	Delta-Terpineol	TGFB1
1096	honeysuckle	Delta-Terpineol	MED1
1097	honeysuckle	Delta-Terpineol	NKX3-1
1098	honeysuckle	Delta-Terpineol	ESR2
1099	honeysuckle	Delta-Terpineol	NEDD4
1100	honeysuckle	Delta-Terpineol	SHH
1101	honeysuckle	Delta-Terpineol	SERPINB3
1102	honeysuckle	Delta-Terpineol	LEF1
1103	honeysuckle	Delta-Terpineol	FGFR2
1104	honeysuckle	Delta-Terpineol	SRC
1105	honeysuckle	Delta-Terpineol	UBR5
1106	honeysuckle	Delta-Terpineol	AREG
1107	honeysuckle	Delta-Terpineol	CD34
1108	honeysuckle	Delta-Terpineol	GPER1
1109	honeysuckle	Delta-Terpineol	WNT5A
1110	honeysuckle	Delta-Terpineol	SOX9
1111	honeysuckle	Delta-Terpineol	PDGFB
1112	honeysuckle	Delta-Terpineol	VDR
1113	honeysuckle	Delta-Terpineol	TRIM24
1114	honeysuckle	Beta-Pinene	KCND1
1115	honeysuckle	Beta-Pinene	KCNA3
1116	honeysuckle	Beta-Pinene	PRKAB1
1117	honeysuckle	Beta-Pinene	ADH1A
1118	honeysuckle	Beta-Pinene	KCNA10
1119	honeysuckle	Beta-Pinene	GAMT
1120	honeysuckle	Beta-Pinene	KCNC3
1121	honeysuckle	Beta-Pinene	KCNA1
1122	honeysuckle	Beta-Pinene	KCNA2
1123	honeysuckle	Beta-Pinene	TPO
1124	honeysuckle	Beta-Pinene	CAT
1125	honeysuckle	Beta-Pinene	KCNB1
1126	honeysuckle	Beta-Pinene	ADH1B
1127	honeysuckle	Beta-Pinene	DLG4
1128	honeysuckle	Beta-Pinene	KCNC2
1129	honeysuckle	Beta-Pinene	KCNC1
1130	honeysuckle	Beta-Pinene	ADH1C
1131	honeysuckle	Beta-Pinene	KCNB2
1132	honeysuckle	Beta-Pinene	KCNA5
1133	honeysuckle	Beta-Pinene	RNASE1
1134	honeysuckle	Beta-Pinene	KCND2
1135	honeysuckle	Beta-Pinene	ALDH2
1136	honeysuckle	Beta-Pinene	KCNA4
1137	honeysuckle	Beta-Pinene	KCNA7
1138	honeysuckle	Beta-Pinene	KCNA6
1139	honeysuckle	Beta-Pinene	KCND3
1140	honeysuckle	Beta-Pinene	GUCY1B3
1141	honeysuckle	Beta-Pinene	GATM
1142	honeysuckle	Beta-Pinene	KCNK4
1143	honeysuckle	Beta-Pinene	IYD
1144	honeysuckle	Beta-Pinene	KCNQ1
1145	honeysuckle	Beta-Pinene	FBP1
1146	honeysuckle	Beta-Pinene	DGKI
1147	honeysuckle	Beta-Pinene	ADH7
1148	honeysuckle	Beta-Pinene	NFIB
1149	honeysuckle	Beta-Pinene	CYGB
1150	honeysuckle	Beta-Pinene	NRXN3
1151	honeysuckle	Beta-Pinene	LRRC4B
1152	honeysuckle	Beta-Pinene	AQP8
1153	honeysuckle	Beta-Pinene	ARX
1154	honeysuckle	Beta-Pinene	IGF1
1155	honeysuckle	Beta-Pinene	SHANK3
1156	honeysuckle	Beta-Pinene	ACY3
1157	honeysuckle	Beta-Pinene	ASPA
1158	honeysuckle	Beta-Pinene	NRXN1
1159	honeysuckle	Beta-Pinene	EDN1
1160	honeysuckle	Beta-Pinene	OXT
1161	honeysuckle	Beta-Pinene	MAGI2
1162	honeysuckle	Beta-Pinene	APOE
1163	honeysuckle	Beta-Pinene	SOX15
1164	honeysuckle	Beta-Pinene	CNTNAP4
1165	honeysuckle	Beta-Pinene	RNASE4
1166	honeysuckle	Beta-Pinene	RAB3A
1167	honeysuckle	Beta-Pinene	MC4R
1168	honeysuckle	Beta-Pinene	IL1B
1169	honeysuckle	Beta-Pinene	GRIN2A
1170	honeysuckle	Beta-Pinene	SLC17A7
1171	honeysuckle	Beta-Pinene	CYP11A1
1172	honeysuckle	Beta-Pinene	SCN5A
1173	honeysuckle	Beta-Pinene	SCN10A
1174	honeysuckle	Beta-Pinene	SPARC
1175	honeysuckle	Beta-Pinene	SORCS3
1176	honeysuckle	Beta-Pinene	RNASE8
1177	honeysuckle	Beta-Pinene	KCNIP2
1178	honeysuckle	Beta-Pinene	GPX7
1179	honeysuckle	Beta-Pinene	CRLF1
1180	honeysuckle	Beta-Pinene	FADD
1181	honeysuckle	Beta-Pinene	SNTG2
1182	honeysuckle	Beta-Pinene	SCGB1A1
1183	honeysuckle	Beta-Pinene	OXTR
1184	honeysuckle	Beta-Pinene	ALDH1B1
1185	honeysuckle	Beta-Pinene	LEP
1186	honeysuckle	Beta-Pinene	NLGN1
1187	honeysuckle	Beta-Pinene	CACNA1D
1188	honeysuckle	Beta-Pinene	RAPGEF2
1189	honeysuckle	Beta-Pinene	DARS
1190	honeysuckle	Beta-Pinene	ANK3
1191	honeysuckle	Beta-Pinene	KCNE5
1192	honeysuckle	Beta-Pinene	PPARD
1193	honeysuckle	Beta-Pinene	NKX2-1
1194	honeysuckle	Beta-Pinene	MIP
1195	honeysuckle	Beta-Pinene	RYR3
1196	honeysuckle	Beta-Pinene	ZPR1
1197	honeysuckle	Beta-Pinene	ALDH3B1
1198	honeysuckle	Beta-Pinene	NPPA
1199	honeysuckle	Beta-Pinene	STX1A
1200	honeysuckle	Beta-Pinene	PAXBP1
1201	honeysuckle	Beta-Pinene	PAX7
1202	honeysuckle	Beta-Pinene	ALDH3B2
1203	honeysuckle	Beta-Pinene	RNASE2
1204	honeysuckle	Beta-Pinene	NRXN2
1205	honeysuckle	Beta-Pinene	ADORA1
1206	honeysuckle	Beta-Pinene	ADH4
1207	honeysuckle	Beta-Pinene	GJA5
1208	honeysuckle	Beta-Pinene	FAS
1209	honeysuckle	Beta-Pinene	DAB2IP
1210	honeysuckle	Beta-Pinene	CYP2E1
1211	honeysuckle	Beta-Pinene	ACY1
1212	honeysuckle	Gamma-Sitosterol	ESR1
1213	honeysuckle	Gamma-Sitosterol	PGR
1214	honeysuckle	Gamma-Sitosterol	VDR
1215	honeysuckle	Gamma-Sitosterol	CYP27B1
1216	honeysuckle	Gamma-Sitosterol	GC
1217	honeysuckle	Gamma-Sitosterol	SNW1
1218	honeysuckle	Gamma-Sitosterol	AR
1219	honeysuckle	Gamma-Sitosterol	NR3C1
1220	honeysuckle	Gamma-Sitosterol	NFKB1
1221	honeysuckle	Gamma-Sitosterol	AKR1C3
1222	honeysuckle	Gamma-Sitosterol	CYP24A1
1223	honeysuckle	Gamma-Sitosterol	GPBAR1
1224	honeysuckle	Gamma-Sitosterol	SNAI2
1225	honeysuckle	Gamma-Sitosterol	MED1
1226	honeysuckle	Gamma-Sitosterol	SNAI1
1227	honeysuckle	Gamma-Sitosterol	CYP3A4
1228	honeysuckle	Gamma-Sitosterol	CALB1
1229	honeysuckle	Gamma-Sitosterol	FGF23
1230	honeysuckle	Gamma-Sitosterol	GFI1
1231	honeysuckle	Gamma-Sitosterol	LANCL2
1232	honeysuckle	Gamma-Sitosterol	WNT4
1233	honeysuckle	Gamma-Sitosterol	TCF3
1234	honeysuckle	Gamma-Sitosterol	BAX
1235	honeysuckle	Gamma-Sitosterol	KL
1236	honeysuckle	Gamma-Sitosterol	CYP2R1
1237	honeysuckle	Gamma-Sitosterol	PML
1238	honeysuckle	Gamma-Sitosterol	B4GALT1
1239	honeysuckle	Gamma-Sitosterol	S100G
1240	honeysuckle	Gamma-Sitosterol	CYP27A1
1241	honeysuckle	Gamma-Sitosterol	KANK2
1242	honeysuckle	Gamma-Sitosterol	IRX5
1243	honeysuckle	Gamma-Sitosterol	RXRA
1244	honeysuckle	Gamma-Sitosterol	NR1H4
1245	honeysuckle	Gamma-Sitosterol	TRIM24
1246	honeysuckle	Pentanoic Acid	SCN11A
1247	honeysuckle	Pentanoic Acid	SCN2B
1248	honeysuckle	Pentanoic Acid	ABAT
1249	honeysuckle	Pentanoic Acid	SCN1A
1250	honeysuckle	Pentanoic Acid	SCN3B
1251	honeysuckle	Pentanoic Acid	SCN3A
1252	honeysuckle	Pentanoic Acid	SCN7A
1253	honeysuckle	Pentanoic Acid	SCN5A
1254	honeysuckle	Pentanoic Acid	SCN10A
1255	honeysuckle	Pentanoic Acid	ALDH5A1
1256	honeysuckle	Pentanoic Acid	SCN2A
1257	honeysuckle	Pentanoic Acid	HDAC9
1258	honeysuckle	Pentanoic Acid	SCN9A
1259	honeysuckle	Pentanoic Acid	SCN4A
1260	honeysuckle	Pentanoic Acid	SCN4B
1261	honeysuckle	Pentanoic Acid	ACADSB
1262	honeysuckle	Pentanoic Acid	SCN8A
1263	honeysuckle	Pentanoic Acid	SCN1B
1264	honeysuckle	Pentanoic Acid	OGDH
1265	honeysuckle	Pentanoic Acid	HDAC2
1266	honeysuckle	Pentanoic Acid	SUCLG2
1267	honeysuckle	Pentanoic Acid	SLC13A2
1268	honeysuckle	Pentanoic Acid	SLC13A1
1269	honeysuckle	Pentanoic Acid	SUCLG1
1270	honeysuckle	Pentanoic Acid	HSD17B6
1271	honeysuckle	Pentanoic Acid	SLC25A10
1272	honeysuckle	Pentanoic Acid	P3H3
1273	honeysuckle	Pentanoic Acid	OXCT2
1274	honeysuckle	Pentanoic Acid	TMLHE
1275	honeysuckle	Pentanoic Acid	PLOD1
1276	honeysuckle	Pentanoic Acid	SUCNR1
1277	honeysuckle	Pentanoic Acid	SLC13A3
1278	honeysuckle	Pentanoic Acid	AKR1D1
1279	honeysuckle	Pentanoic Acid	ASPH
1280	honeysuckle	Pentanoic Acid	BBOX1
1281	honeysuckle	Pentanoic Acid	SDHB
1282	honeysuckle	Pentanoic Acid	TYR
1283	honeysuckle	Pentanoic Acid	OXCT1
1284	honeysuckle	Pentanoic Acid	PLOD3
1285	honeysuckle	Pentanoic Acid	P4HA1
1286	honeysuckle	Pentanoic Acid	SDHC
1287	honeysuckle	Pentanoic Acid	SRD5A2
1288	honeysuckle	Pentanoic Acid	P3H2
1289	honeysuckle	Pentanoic Acid	SDHA
1290	honeysuckle	Pentanoic Acid	P4HA2
1291	honeysuckle	Pentanoic Acid	SUCLA2
1292	honeysuckle	Pentanoic Acid	SDHD
1293	honeysuckle	Pentanoic Acid	P3H1
1294	honeysuckle	Pentanoic Acid	DCT
1295	honeysuckle	Pentanoic Acid	AKR1C3
1296	honeysuckle	Pentanoic Acid	CRTAP
1297	honeysuckle	Pentanoic Acid	SLIT2
1298	honeysuckle	Pentanoic Acid	ACO2
1299	honeysuckle	Pentanoic Acid	JMJD6
1300	honeysuckle	Pentanoic Acid	SLC13A4
1301	honeysuckle	Pentanoic Acid	SDHAF2
1302	honeysuckle	Pentanoic Acid	SLC1A3
1303	honeysuckle	Pentanoic Acid	SALL1
1304	honeysuckle	Pentanoic Acid	HSD17B11
1305	honeysuckle	Pentanoic Acid	TYRP1
1306	honeysuckle	Pentanoic Acid	HIF1AN
1307	honeysuckle	Pentanoic Acid	UROS
1308	honeysuckle	Pentanoic Acid	SLC13A5
1309	honeysuckle	Pentanoic Acid	P4HB
1310	honeysuckle	Pentanoic Acid	PLAT
1311	honeysuckle	Pentanoic Acid	ESRRG
1312	honeysuckle	Pentanoic Acid	COX6C
1313	honeysuckle	Pentanoic Acid	COX5B
1314	honeysuckle	Pentanoic Acid	COX7C
1315	honeysuckle	Pentanoic Acid	GABRB1
1316	honeysuckle	Pentanoic Acid	COX1
1317	honeysuckle	Pentanoic Acid	IARS2
1318	honeysuckle	Pentanoic Acid	BCAT1
1319	honeysuckle	Pentanoic Acid	AKR1C2
1320	honeysuckle	Pentanoic Acid	LCMT1
1321	honeysuckle	Pentanoic Acid	SLC52A2
1322	honeysuckle	Pentanoic Acid	COX5A
1323	honeysuckle	Pentanoic Acid	COX3
1324	honeysuckle	Pentanoic Acid	AR
1325	honeysuckle	Pentanoic Acid	COX7A1
1326	honeysuckle	Pentanoic Acid	FECH
1327	honeysuckle	Pentanoic Acid	PLG
1328	honeysuckle	Pentanoic Acid	COX4I1
1329	honeysuckle	Pentanoic Acid	PLA2G1B
1330	honeysuckle	Pentanoic Acid	COX6A2
1331	honeysuckle	Pentanoic Acid	LARS
1332	honeysuckle	Pentanoic Acid	ADH1C
1333	honeysuckle	Pentanoic Acid	COX6B1
1334	honeysuckle	Pentanoic Acid	FABP6
1335	honeysuckle	Pentanoic Acid	CES1
1336	honeysuckle	Pentanoic Acid	LARS2
1337	honeysuckle	Pentanoic Acid	COX7B
1338	honeysuckle	Pentanoic Acid	COX2
1339	honeysuckle	Pentanoic Acid	IARS
1340	honeysuckle	Pentanoic Acid	BCAT2
1341	honeysuckle	Pentanoic Acid	COX8A
1342	honeysuckle	Pentanoic Acid	NR1H4
1343	honeysuckle	Pentanoic Acid	LCMT2
1344	honeysuckle	Pentanoic Acid	HDAC1
1345	honeysuckle	Pentanoic Acid	GPD1L
1346	honeysuckle	Pentanoic Acid	SRD5A1
1347	honeysuckle	Pentanoic Acid	FBXO45
1348	honeysuckle	Pentanoic Acid	SIRT1
1349	honeysuckle	Pentanoic Acid	SHMT1
1350	honeysuckle	Pentanoic Acid	SUGCT
1351	honeysuckle	Pentanoic Acid	ACSS2
1352	honeysuckle	Pentanoic Acid	ARV1
1353	honeysuckle	Pentanoic Acid	SIX1
1354	honeysuckle	Pentanoic Acid	BDH1
1355	honeysuckle	Pentanoic Acid	COLGALT2
1356	honeysuckle	Pentanoic Acid	SIX4
1357	honeysuckle	Pentanoic Acid	MRPS36
1358	honeysuckle	Pentanoic Acid	OSBPL8
1359	honeysuckle	Pentanoic Acid	SPI1
1360	honeysuckle	Pentanoic Acid	SUOX
1361	honeysuckle	Pentanoic Acid	CCL2
1362	honeysuckle	Pentanoic Acid	BCKDK
1363	honeysuckle	Pentanoic Acid	UBE2B
1364	honeysuckle	Pentanoic Acid	CYP1A2
1365	honeysuckle	Pentanoic Acid	CCL5
1366	honeysuckle	Pentanoic Acid	ANK2
1367	honeysuckle	Pentanoic Acid	HSD17B2
1368	honeysuckle	Pentanoic Acid	STIM2
1369	honeysuckle	Pentanoic Acid	PKD2
1370	honeysuckle	Pentanoic Acid	ALDH9A1
1371	honeysuckle	Pentanoic Acid	TH
1372	honeysuckle	Pentanoic Acid	EPO
1373	honeysuckle	Pentanoic Acid	COLGALT1
1374	honeysuckle	Pentanoic Acid	NEDD4
1375	honeysuckle	Pentanoic Acid	CYP11A1
1376	honeysuckle	Pentanoic Acid	DHODH
1377	honeysuckle	Pentanoic Acid	CLN3
1378	honeysuckle	Pentanoic Acid	ARID1A
1379	honeysuckle	Pentanoic Acid	EGLN2
1380	honeysuckle	Pentanoic Acid	ACAT1
1381	honeysuckle	Pentanoic Acid	GALC
1382	honeysuckle	Pentanoic Acid	PLCG2
1383	honeysuckle	Pentanoic Acid	ACOT4
1384	honeysuckle	Pentanoic Acid	PHGDH
1385	honeysuckle	Pentanoic Acid	PNLIPRP2
1386	honeysuckle	Pentanoic Acid	CYP39A1
1387	honeysuckle	Pentanoic Acid	BCKDHA
1388	honeysuckle	Pentanoic Acid	SLC25A12
1389	honeysuckle	Pentanoic Acid	YBX3
1390	honeysuckle	Pentanoic Acid	2022-03-08
1391	honeysuckle	Pentanoic Acid	STIM1
1392	honeysuckle	Pentanoic Acid	GAL3ST1
1393	honeysuckle	Pentanoic Acid	CDH11
1394	honeysuckle	Pentanoic Acid	CACNA1D
1395	honeysuckle	Pentanoic Acid	DDC
1396	honeysuckle	Pentanoic Acid	DHTKD1
1397	honeysuckle	Pentanoic Acid	NEDD4L
1398	honeysuckle	Pentanoic Acid	BDKRB2
1399	honeysuckle	Pentanoic Acid	PRPH
1400	honeysuckle	Pentanoic Acid	BCKDHB
1401	honeysuckle	Pentanoic Acid	KCNE5
1402	honeysuckle	Pentanoic Acid	SRD5A3
1403	honeysuckle	Pentanoic Acid	SMAD7
1404	honeysuckle	Pentanoic Acid	PRDM8
1405	honeysuckle	Pentanoic Acid	UROD
1406	honeysuckle	Pentanoic Acid	UGT8
1407	honeysuckle	Pentanoic Acid	ETHE1
1408	honeysuckle	Pentanoic Acid	WNT10B
1409	honeysuckle	Pentanoic Acid	OGFOD1
1410	honeysuckle	Pentanoic Acid	SLC38A7
1411	honeysuckle	Pentanoic Acid	ACSS1
1412	honeysuckle	Pentanoic Acid	CYP4B1
1413	honeysuckle	Pentanoic Acid	STAR
1414	honeysuckle	Pentanoic Acid	DLST
1415	honeysuckle	Pentanoic Acid	PF4
1416	honeysuckle	Pentanoic Acid	CRACR2A
1417	honeysuckle	Pentanoic Acid	HSD17B1
1418	honeysuckle	Pentanoic Acid	CAMK2D
1419	honeysuckle	Pentanoic Acid	AP3D1
1420	honeysuckle	Pentanoic Acid	MYO5A
1421	honeysuckle	Pentanoic Acid	ILVBL
1422	honeysuckle	Pentanoic Acid	CAV3
1423	honeysuckle	Pentanoic Acid	HTT
1424	honeysuckle	Pentanoic Acid	IL10
1425	honeysuckle	Pentanoic Acid	EGLN3
1426	honeysuckle	Pentanoic Acid	OGDHL
1427	honeysuckle	Pentanoic Acid	KCNA5
1428	honeysuckle	Pentanoic Acid	TST
1429	honeysuckle	Pentanoic Acid	SLC1A6
1430	honeysuckle	Pentanoic Acid	NPPA
1431	honeysuckle	Pentanoic Acid	ACADM
1432	honeysuckle	Pentanoic Acid	SQRDL
1433	honeysuckle	Pentanoic Acid	TMEM110
1434	honeysuckle	Pentanoic Acid	CDC42
1435	honeysuckle	Pentanoic Acid	ARHGEF2
1436	honeysuckle	Pentanoic Acid	EGLN1
1437	honeysuckle	Pentanoic Acid	ETFDH
1438	honeysuckle	Pentanoic Acid	EPHA4
1439	honeysuckle	Pentanoic Acid	OCA2
1440	honeysuckle	Pentanoic Acid	HSD17B8
1441	honeysuckle	Pentanoic Acid	CTNNB1
1442	honeysuckle	Pentanoic Acid	P4HA3
1443	honeysuckle	Pentanoic Acid	EDA
1444	honeysuckle	Pentanoic Acid	HACL1
1445	honeysuckle	Pentanoic Acid	RYR2
1446	honeysuckle	Pentanoic Acid	HAP1
1447	honeysuckle	Pentanoic Acid	PCSK9
1448	honeysuckle	Pentanoic Acid	KCNQ1
1449	honeysuckle	Pentanoic Acid	CASQ2
1450	honeysuckle	Pentanoic Acid	GJA5
1451	honeysuckle	Pentanoic Acid	DHRS9
1452	honeysuckle	Pentanoic Acid	GPR143
1453	honeysuckle	Pentanoic Acid	UGT1A1
1454	honeysuckle	Pentanoic Acid	DLD
1455	honeysuckle	Pentanoic Acid	GNAS
1456	honeysuckle	Pentanoic Acid	SLC25A13
1457	honeysuckle	Pentanoic Acid	SFXN5
1458	honeysuckle	Pentanoic Acid	PLOD2
1459	honeysuckle	Pentanoic Acid	CYP1A1
1460	honeysuckle	Pentanoic Acid	SULT2A1
1461	honeysuckle	Pentanoic Acid	NFX1
1462	honeysuckle	Pentanoic Acid	DBT
1463	honeysuckle	Pentanoic Acid	SLC25A1
1464	honeysuckle	Phenylacetaldehyde	PLAT
1465	honeysuckle	Phenylacetaldehyde	THBD
1466	honeysuckle	Phenylacetaldehyde	PPARG
1467	honeysuckle	Phenylacetaldehyde	BCL2
1468	honeysuckle	Phenylacetaldehyde	FABP2
1469	honeysuckle	Phenylacetaldehyde	CFTR
1470	honeysuckle	Phenylacetaldehyde	PTGS1
1471	honeysuckle	Phenylacetaldehyde	PTGS2
1472	honeysuckle	Isoeugenol	CNR2
1473	honeysuckle	Isoeugenol	TYR
1474	honeysuckle	Isoeugenol	TYR
1475	honeysuckle	Citronellol	RDH11
1476	honeysuckle	Citronellol	RBP3
1477	honeysuckle	Citronellol	RETSAT
1478	honeysuckle	Citronellol	RDH13
1479	honeysuckle	Citronellol	DHRS3
1480	honeysuckle	Citronellol	RDH5
1481	honeysuckle	Citronellol	ALDH1A3
1482	honeysuckle	Citronellol	RDH12
1483	honeysuckle	Citronellol	DHRS4
1484	honeysuckle	Citronellol	RBP1
1485	honeysuckle	Citronellol	ALDH1A1
1486	honeysuckle	Citronellol	RLBP1
1487	honeysuckle	Citronellol	RDH14
1488	honeysuckle	Citronellol	RDH8
1489	honeysuckle	Citronellol	LRAT
1490	honeysuckle	Citronellol	ALDH1A2
1491	honeysuckle	Citronellol	ALDH3A1
1492	honeysuckle	Citronellol	RHO
1493	honeysuckle	Citronellol	RS1
1494	honeysuckle	Citronellol	F12
1495	honeysuckle	Citronellol	ESR1
1496	honeysuckle	Citronellol	PGR
1497	honeysuckle	Citronellol	CTSH
1498	honeysuckle	Citronellol	OPN4
1499	honeysuckle	Citronellol	RDH10
1500	honeysuckle	Citronellol	ALDH8A1
1501	honeysuckle	Citronellol	SHBG
1502	honeysuckle	Citronellol	DHRS2
1503	honeysuckle	Citronellol	HSD17B7
1504	honeysuckle	Citronellol	AR
1505	honeysuckle	Citronellol	THRA
1506	honeysuckle	Citronellol	PAX2
1507	honeysuckle	Citronellol	CBR3
1508	honeysuckle	Citronellol	GATA3
1509	honeysuckle	Citronellol	ASCL1
1510	honeysuckle	Citronellol	DLX5
1511	honeysuckle	Citronellol	RET
1512	honeysuckle	Citronellol	THRB
1513	honeysuckle	Citronellol	CRYM
1514	honeysuckle	Citronellol	TSPO
1515	honeysuckle	Citronellol	OPN5
1516	honeysuckle	Citronellol	DHRS9
1517	honeysuckle	Citronellol	CBR1
1518	honeysuckle	Citronellol	CYP1A1
1519	honeysuckle	Carvacrol Acetate	SCN10A
1520	honeysuckle	Carvacrol Acetate	ACHE
1521	honeysuckle	Carvacrol Acetate	BCHE
1522	honeysuckle	Carvacrol Acetate	COLQ
1523	honeysuckle	Carvacrol Acetate	SLC5A7
1524	honeysuckle	Carvacrol Acetate	NRG1
1525	honeysuckle	Carvacrol Acetate	DMGDH
1526	honeysuckle	Carvacrol Acetate	SIX3
1527	honeysuckle	Carvacrol Acetate	ANK2
1528	honeysuckle	Carvacrol Acetate	CRP
1529	honeysuckle	Carvacrol Acetate	SCN5A
1530	honeysuckle	Carvacrol Acetate	PRSS12
1531	honeysuckle	Carvacrol Acetate	SLC44A4
1532	honeysuckle	Carvacrol Acetate	ALDH7A1
1533	honeysuckle	Carvacrol Acetate	DNM3
1534	honeysuckle	Carvacrol Acetate	SCN4B
1535	honeysuckle	Carvacrol Acetate	ASCL1
1536	honeysuckle	Carvacrol Acetate	ENPP6
1537	honeysuckle	Carvacrol Acetate	CDH8
1538	honeysuckle	Carvacrol Acetate	KCNA5
1539	honeysuckle	Carvacrol Acetate	FNTA
1540	honeysuckle	Carvacrol Acetate	AGRN
1541	honeysuckle	Carvacrol Acetate	CHKA
1542	honeysuckle	Carvacrol Acetate	RYR2
1543	honeysuckle	Carvacrol Acetate	CHDH
1544	honeysuckle	Carvacrol Acetate	GJA5
1545	honeysuckle	Carvacrol Acetate	GRIN1
1546	honeysuckle	2-Methylbutanoic Acid	GABRB1
1547	honeysuckle	2-Methylbutanoic Acid	SLC52A2
1548	honeysuckle	2-Methylbutanoic Acid	SCN11A
1549	honeysuckle	2-Methylbutanoic Acid	SCN2B
1550	honeysuckle	2-Methylbutanoic Acid	SUCLG2
1551	honeysuckle	2-Methylbutanoic Acid	SLC13A2
1552	honeysuckle	2-Methylbutanoic Acid	ABAT
1553	honeysuckle	2-Methylbutanoic Acid	SCN1A
1554	honeysuckle	2-Methylbutanoic Acid	SCN3B
1555	honeysuckle	2-Methylbutanoic Acid	SLC13A1
1556	honeysuckle	2-Methylbutanoic Acid	SUCLG1
1557	honeysuckle	2-Methylbutanoic Acid	HSD17B6
1558	honeysuckle	2-Methylbutanoic Acid	SCN3A
1559	honeysuckle	2-Methylbutanoic Acid	SLC25A10
1560	honeysuckle	2-Methylbutanoic Acid	P3H3
1561	honeysuckle	2-Methylbutanoic Acid	OXCT2
1562	honeysuckle	2-Methylbutanoic Acid	TMLHE
1563	honeysuckle	2-Methylbutanoic Acid	SCN7A
1564	honeysuckle	2-Methylbutanoic Acid	PLOD1
1565	honeysuckle	2-Methylbutanoic Acid	SCN5A
1566	honeysuckle	2-Methylbutanoic Acid	SCN10A
1567	honeysuckle	2-Methylbutanoic Acid	SUCNR1
1568	honeysuckle	2-Methylbutanoic Acid	SLC13A3
1569	honeysuckle	2-Methylbutanoic Acid	AKR1D1
1570	honeysuckle	2-Methylbutanoic Acid	ALDH5A1
1571	honeysuckle	2-Methylbutanoic Acid	SCN2A
1572	honeysuckle	2-Methylbutanoic Acid	ASPH
1573	honeysuckle	2-Methylbutanoic Acid	BBOX1
1574	honeysuckle	2-Methylbutanoic Acid	SDHB
1575	honeysuckle	2-Methylbutanoic Acid	HDAC9
1576	honeysuckle	2-Methylbutanoic Acid	TYR
1577	honeysuckle	2-Methylbutanoic Acid	SCN9A
1578	honeysuckle	2-Methylbutanoic Acid	OXCT1
1579	honeysuckle	2-Methylbutanoic Acid	SCN4A
1580	honeysuckle	2-Methylbutanoic Acid	SCN4B
1581	honeysuckle	2-Methylbutanoic Acid	PLOD3
1582	honeysuckle	2-Methylbutanoic Acid	P4HA1
1583	honeysuckle	2-Methylbutanoic Acid	SDHC
1584	honeysuckle	2-Methylbutanoic Acid	SRD5A2
1585	honeysuckle	2-Methylbutanoic Acid	ACADSB
1586	honeysuckle	2-Methylbutanoic Acid	SCN8A
1587	honeysuckle	2-Methylbutanoic Acid	SCN1B
1588	honeysuckle	2-Methylbutanoic Acid	P3H2
1589	honeysuckle	2-Methylbutanoic Acid	SDHA
1590	honeysuckle	2-Methylbutanoic Acid	OGDH
1591	honeysuckle	2-Methylbutanoic Acid	P4HA2
1592	honeysuckle	2-Methylbutanoic Acid	SUCLA2
1593	honeysuckle	2-Methylbutanoic Acid	HDAC2
1594	honeysuckle	2-Methylbutanoic Acid	SDHD
1595	honeysuckle	2-Methylbutanoic Acid	P3H1
1596	honeysuckle	2-Methylbutanoic Acid	DCT
1597	honeysuckle	2-Methylbutanoic Acid	AKR1C3
1598	honeysuckle	2-Methylbutanoic Acid	CRTAP
1599	honeysuckle	2-Methylbutanoic Acid	SLIT2
1600	honeysuckle	2-Methylbutanoic Acid	ACO2
1601	honeysuckle	2-Methylbutanoic Acid	JMJD6
1602	honeysuckle	2-Methylbutanoic Acid	SLC13A4
1603	honeysuckle	2-Methylbutanoic Acid	SDHAF2
1604	honeysuckle	2-Methylbutanoic Acid	SLC1A3
1605	honeysuckle	2-Methylbutanoic Acid	SALL1
1606	honeysuckle	2-Methylbutanoic Acid	HSD17B11
1607	honeysuckle	2-Methylbutanoic Acid	TYRP1
1608	honeysuckle	2-Methylbutanoic Acid	HIF1AN
1609	honeysuckle	2-Methylbutanoic Acid	UROS
1610	honeysuckle	2-Methylbutanoic Acid	SLC13A5
1611	honeysuckle	2-Methylbutanoic Acid	P4HB
1612	honeysuckle	2-Methylbutanoic Acid	SLC16A6
1613	honeysuckle	2-Methylbutanoic Acid	SLC16A8
1614	honeysuckle	2-Methylbutanoic Acid	BCAT1
1615	honeysuckle	2-Methylbutanoic Acid	PC
1616	honeysuckle	2-Methylbutanoic Acid	VARS
1617	honeysuckle	2-Methylbutanoic Acid	SLC16A1
1618	honeysuckle	2-Methylbutanoic Acid	SLC16A7
1619	honeysuckle	2-Methylbutanoic Acid	TARS
1620	honeysuckle	2-Methylbutanoic Acid	THNSL1
1621	honeysuckle	2-Methylbutanoic Acid	PKM
1622	honeysuckle	2-Methylbutanoic Acid	PDHB
1623	honeysuckle	2-Methylbutanoic Acid	SLC16A5
1624	honeysuckle	2-Methylbutanoic Acid	SLC16A2
1625	honeysuckle	2-Methylbutanoic Acid	PKLR
1626	honeysuckle	2-Methylbutanoic Acid	SLC16A4
1627	honeysuckle	2-Methylbutanoic Acid	TARS2
1628	honeysuckle	2-Methylbutanoic Acid	PCCB
1629	honeysuckle	2-Methylbutanoic Acid	AGXT2
1630	honeysuckle	2-Methylbutanoic Acid	SLC16A3
1631	honeysuckle	2-Methylbutanoic Acid	HDAC1
1632	honeysuckle	2-Methylbutanoic Acid	GPD1L
1633	honeysuckle	2-Methylbutanoic Acid	SRD5A1
1634	honeysuckle	2-Methylbutanoic Acid	FBXO45
1635	honeysuckle	2-Methylbutanoic Acid	SIRT1
1636	honeysuckle	2-Methylbutanoic Acid	SHMT1
1637	honeysuckle	2-Methylbutanoic Acid	SUGCT
1638	honeysuckle	2-Methylbutanoic Acid	ACSS2
1639	honeysuckle	2-Methylbutanoic Acid	ARV1
1640	honeysuckle	2-Methylbutanoic Acid	SIX1
1641	honeysuckle	2-Methylbutanoic Acid	BDH1
1642	honeysuckle	2-Methylbutanoic Acid	COLGALT2
1643	honeysuckle	2-Methylbutanoic Acid	SIX4
1644	honeysuckle	2-Methylbutanoic Acid	MRPS36
1645	honeysuckle	2-Methylbutanoic Acid	OSBPL8
1646	honeysuckle	2-Methylbutanoic Acid	SPI1
1647	honeysuckle	2-Methylbutanoic Acid	SUOX
1648	honeysuckle	2-Methylbutanoic Acid	CCL2
1649	honeysuckle	2-Methylbutanoic Acid	BCKDK
1650	honeysuckle	2-Methylbutanoic Acid	UBE2B
1651	honeysuckle	2-Methylbutanoic Acid	CYP1A2
1652	honeysuckle	2-Methylbutanoic Acid	CCL5
1653	honeysuckle	2-Methylbutanoic Acid	ANK2
1654	honeysuckle	2-Methylbutanoic Acid	HSD17B2
1655	honeysuckle	2-Methylbutanoic Acid	STIM2
1656	honeysuckle	2-Methylbutanoic Acid	PKD2
1657	honeysuckle	2-Methylbutanoic Acid	ALDH9A1
1658	honeysuckle	2-Methylbutanoic Acid	TH
1659	honeysuckle	2-Methylbutanoic Acid	EPO
1660	honeysuckle	2-Methylbutanoic Acid	COLGALT1
1661	honeysuckle	2-Methylbutanoic Acid	NEDD4
1662	honeysuckle	2-Methylbutanoic Acid	CYP11A1
1663	honeysuckle	2-Methylbutanoic Acid	DHODH
1664	honeysuckle	2-Methylbutanoic Acid	CLN3
1665	honeysuckle	2-Methylbutanoic Acid	ARID1A
1666	honeysuckle	2-Methylbutanoic Acid	EGLN2
1667	honeysuckle	2-Methylbutanoic Acid	ACAT1
1668	honeysuckle	2-Methylbutanoic Acid	GALC
1669	honeysuckle	2-Methylbutanoic Acid	PLCG2
1670	honeysuckle	2-Methylbutanoic Acid	ACOT4
1671	honeysuckle	2-Methylbutanoic Acid	PHGDH
1672	honeysuckle	2-Methylbutanoic Acid	PNLIPRP2
1673	honeysuckle	2-Methylbutanoic Acid	CYP39A1
1674	honeysuckle	2-Methylbutanoic Acid	BCKDHA
1675	honeysuckle	2-Methylbutanoic Acid	SLC25A12
1676	honeysuckle	2-Methylbutanoic Acid	YBX3
1677	honeysuckle	2-Methylbutanoic Acid	2022-03-08
1678	honeysuckle	2-Methylbutanoic Acid	STIM1
1679	honeysuckle	2-Methylbutanoic Acid	GAL3ST1
1680	honeysuckle	2-Methylbutanoic Acid	CDH11
1681	honeysuckle	2-Methylbutanoic Acid	CACNA1D
1682	honeysuckle	2-Methylbutanoic Acid	DDC
1683	honeysuckle	2-Methylbutanoic Acid	DHTKD1
1684	honeysuckle	2-Methylbutanoic Acid	NEDD4L
1685	honeysuckle	2-Methylbutanoic Acid	BDKRB2
1686	honeysuckle	2-Methylbutanoic Acid	PRPH
1687	honeysuckle	2-Methylbutanoic Acid	BCKDHB
1688	honeysuckle	2-Methylbutanoic Acid	KCNE5
1689	honeysuckle	2-Methylbutanoic Acid	SRD5A3
1690	honeysuckle	2-Methylbutanoic Acid	SMAD7
1691	honeysuckle	2-Methylbutanoic Acid	PRDM8
1692	honeysuckle	2-Methylbutanoic Acid	UROD
1693	honeysuckle	2-Methylbutanoic Acid	UGT8
1694	honeysuckle	2-Methylbutanoic Acid	ETHE1
1695	honeysuckle	2-Methylbutanoic Acid	WNT10B
1696	honeysuckle	2-Methylbutanoic Acid	OGFOD1
1697	honeysuckle	2-Methylbutanoic Acid	SLC38A7
1698	honeysuckle	2-Methylbutanoic Acid	ACSS1
1699	honeysuckle	2-Methylbutanoic Acid	CYP4B1
1700	honeysuckle	2-Methylbutanoic Acid	STAR
1701	honeysuckle	2-Methylbutanoic Acid	DLST
1702	honeysuckle	2-Methylbutanoic Acid	PF4
1703	honeysuckle	2-Methylbutanoic Acid	CRACR2A
1704	honeysuckle	2-Methylbutanoic Acid	HSD17B1
1705	honeysuckle	2-Methylbutanoic Acid	CAMK2D
1706	honeysuckle	2-Methylbutanoic Acid	AP3D1
1707	honeysuckle	2-Methylbutanoic Acid	MYO5A
1708	honeysuckle	2-Methylbutanoic Acid	ILVBL
1709	honeysuckle	2-Methylbutanoic Acid	CAV3
1710	honeysuckle	2-Methylbutanoic Acid	HTT
1711	honeysuckle	2-Methylbutanoic Acid	IL10
1712	honeysuckle	2-Methylbutanoic Acid	EGLN3
1713	honeysuckle	2-Methylbutanoic Acid	OGDHL
1714	honeysuckle	2-Methylbutanoic Acid	KCNA5
1715	honeysuckle	2-Methylbutanoic Acid	TST
1716	honeysuckle	2-Methylbutanoic Acid	SLC1A6
1717	honeysuckle	2-Methylbutanoic Acid	NPPA
1718	honeysuckle	2-Methylbutanoic Acid	ACADM
1719	honeysuckle	2-Methylbutanoic Acid	SQRDL
1720	honeysuckle	2-Methylbutanoic Acid	TMEM110
1721	honeysuckle	2-Methylbutanoic Acid	CDC42
1722	honeysuckle	2-Methylbutanoic Acid	ARHGEF2
1723	honeysuckle	2-Methylbutanoic Acid	EGLN1
1724	honeysuckle	2-Methylbutanoic Acid	ETFDH
1725	honeysuckle	2-Methylbutanoic Acid	EPHA4
1726	honeysuckle	2-Methylbutanoic Acid	OCA2
1727	honeysuckle	2-Methylbutanoic Acid	HSD17B8
1728	honeysuckle	2-Methylbutanoic Acid	CTNNB1
1729	honeysuckle	2-Methylbutanoic Acid	P4HA3
1730	honeysuckle	2-Methylbutanoic Acid	EDA
1731	honeysuckle	2-Methylbutanoic Acid	HACL1
1732	honeysuckle	2-Methylbutanoic Acid	RYR2
1733	honeysuckle	2-Methylbutanoic Acid	HAP1
1734	honeysuckle	2-Methylbutanoic Acid	PCSK9
1735	honeysuckle	2-Methylbutanoic Acid	KCNQ1
1736	honeysuckle	2-Methylbutanoic Acid	CASQ2
1737	honeysuckle	2-Methylbutanoic Acid	GJA5
1738	honeysuckle	2-Methylbutanoic Acid	DHRS9
1739	honeysuckle	2-Methylbutanoic Acid	GPR143
1740	honeysuckle	2-Methylbutanoic Acid	UGT1A1
1741	honeysuckle	2-Methylbutanoic Acid	DLD
1742	honeysuckle	2-Methylbutanoic Acid	GNAS
1743	honeysuckle	2-Methylbutanoic Acid	SLC25A13
1744	honeysuckle	2-Methylbutanoic Acid	SFXN5
1745	honeysuckle	2-Methylbutanoic Acid	PLOD2
1746	honeysuckle	2-Methylbutanoic Acid	CYP1A1
1747	honeysuckle	2-Methylbutanoic Acid	SULT2A1
1748	honeysuckle	2-Methylbutanoic Acid	NFX1
1749	honeysuckle	2-Methylbutanoic Acid	DBT
1750	honeysuckle	2-Methylbutanoic Acid	SLC25A1
1751	honeysuckle	Hederagenin 3-O-Arabinoside	NR3C1
1752	honeysuckle	Hederagenin 3-O-Arabinoside	ATP1A1
1753	honeysuckle	Macranthoside A	GLRA3
1754	honeysuckle	Macranthoside A	NR3C1
1755	honeysuckle	Macranthoside A	ATP1A1
1756	honeysuckle	Macranthoside A	GABRB3
1757	honeysuckle	Phenethyl Alcohol	PDE5A
1758	honeysuckle	Phenethyl Alcohol	PDE4A
1759	honeysuckle	Phenethyl Alcohol	PDE10A
1760	honeysuckle	Phenethyl Alcohol	ADA
1761	honeysuckle	Phenethyl Alcohol	ITFG2
1762	honeysuckle	Phenethyl Alcohol	DGUOK
1763	honeysuckle	Phenethyl Alcohol	XDH
1764	honeysuckle	Phenethyl Alcohol	ADORA1
1765	honeysuckle	Phenethyl Alcohol	PLAT
1766	honeysuckle	Phenethyl Alcohol	THBD
1767	honeysuckle	Phenethyl Alcohol	PPARG
1768	honeysuckle	Phenethyl Alcohol	BCL2
1769	honeysuckle	Phenethyl Alcohol	FABP2
1770	honeysuckle	Phenethyl Alcohol	CFTR
1771	honeysuckle	Phenethyl Alcohol	PTGS1
1772	honeysuckle	Phenethyl Alcohol	PTGS2
1773	honeysuckle	Phenethyl Alcohol	PDE9A
1774	honeysuckle	Phenethyl Alcohol	NUDT1
1775	honeysuckle	Phenethyl Alcohol	CD74
1776	honeysuckle	Phenethyl Alcohol	GUK1
1777	honeysuckle	Phenethyl Alcohol	PDE3A
1778	honeysuckle	Phenethyl Alcohol	SIRT2
1779	honeysuckle	Phenethyl Alcohol	MIF
1780	honeysuckle	Phenethyl Alcohol	CNTN2
1781	honeysuckle	Phenethyl Alcohol	DPYD
1782	honeysuckle	Phenethyl Alcohol	TNFSF13
1783	honeysuckle	Phenethyl Alcohol	ADK
1784	honeysuckle	Phenethyl Alcohol	ITPA
1785	honeysuckle	Phenethyl Alcohol	PIK3CG
1786	honeysuckle	Phenethyl Alcohol	PRPS1
1787	honeysuckle	Phenethyl Alcohol	CECR1
1788	honeysuckle	Phenethyl Alcohol	BCL10
1789	honeysuckle	Phenethyl Alcohol	ADRBK1
1790	honeysuckle	Phenethyl Alcohol	PNP
1791	honeysuckle	Phenethyl Alcohol	APRT
1792	honeysuckle	Phenethyl Alcohol	AURKA
1793	honeysuckle	Phenethyl Alcohol	GHRL
1794	honeysuckle	Phenethyl Alcohol	DRD2
1795	honeysuckle	Phenethyl Alcohol	PDE1B
1796	honeysuckle	Phenethyl Alcohol	SAMHD1
1797	honeysuckle	Phenethyl Alcohol	DERA
1798	honeysuckle	Phenethyl Alcohol	TNFSF13B
1799	honeysuckle	Phenethyl Alcohol	CRH
1800	honeysuckle	Phenethyl Alcohol	ATP1A2
1801	honeysuckle	Phenethyl Alcohol	TNFRSF13C
1802	honeysuckle	Phenethyl Alcohol	ATP2A1
1803	honeysuckle	Phenethyl Alcohol	ADAL
1804	honeysuckle	Phenethyl Alcohol	ACPP
1805	honeysuckle	Phenethyl Alcohol	MGEA5
1806	honeysuckle	Phenethyl Alcohol	DRD1
1807	honeysuckle	Phenethyl Alcohol	PDE2A
1808	honeysuckle	Phenethyl Alcohol	NUDT16
1809	honeysuckle	Phenethyl Alcohol	HPRT1
1810	honeysuckle	Phenethyl Alcohol	NUDT15
1811	honeysuckle	Phenethyl Alcohol	PDE11A
1812	honeysuckle	(3r)-4'-Methoxy-2',3,7-Trihydroxyisoflavanone	SOAT1
1813	honeysuckle	(3r)-4'-Methoxy-2',3,7-Trihydroxyisoflavanone	MTTP
1814	honeysuckle	(3r)-4'-Methoxy-2',3,7-Trihydroxyisoflavanone	SOAT2
1815	honeysuckle	(3r)-4'-Methoxy-2',3,7-Trihydroxyisoflavanone	OPRK1
1816	honeysuckle	(3r)-4'-Methoxy-2',3,7-Trihydroxyisoflavanone	OPRM1
1817	honeysuckle	Eugenol	TRPV3
1818	honeysuckle	Eugenol	OPRK1
1819	honeysuckle	Eugenol	TRPM8
1820	honeysuckle	Eugenol	TRPA1
1821	honeysuckle	Eugenol	CNR2
1822	honeysuckle	Eugenol	TYR
1823	honeysuckle	Eugenol	CNR1
1824	honeysuckle	Macranthoidin B	GLRA3
1825	honeysuckle	Macranthoidin B	NR3C1
1826	honeysuckle	Macranthoidin B	ATP1A1
1827	honeysuckle	Macranthoidin B	GABRB3
1828	honeysuckle	Hexanoic Acid	CHRM1
1829	honeysuckle	Hexanoic Acid	CHRM2
1830	honeysuckle	Linalool	ESR1
1831	honeysuckle	Linalool	PGR
1832	honeysuckle	Linalool	WNT4
1833	honeysuckle	Linalool	TFAP2C
1834	honeysuckle	Linalool	TNFSF11
1835	honeysuckle	Linalool	PHB
1836	honeysuckle	Linalool	TOX3
1837	honeysuckle	Linalool	TGFB1
1838	honeysuckle	Linalool	MED1
1839	honeysuckle	Linalool	NKX3-1
1840	honeysuckle	Linalool	ESR2
1841	honeysuckle	Linalool	NEDD4
1842	honeysuckle	Linalool	SHH
1843	honeysuckle	Linalool	SERPINB3
1844	honeysuckle	Linalool	LEF1
1845	honeysuckle	Linalool	FGFR2
1846	honeysuckle	Linalool	SRC
1847	honeysuckle	Linalool	UBR5
1848	honeysuckle	Linalool	AREG
1849	honeysuckle	Linalool	CD34
1850	honeysuckle	Linalool	GPER1
1851	honeysuckle	Linalool	WNT5A
1852	honeysuckle	Linalool	SOX9
1853	honeysuckle	Linalool	PDGFB
1854	honeysuckle	Linalool	VDR
1855	honeysuckle	Linalool	TRIM24
1856	honeysuckle	Farnesol	RDH11
1857	honeysuckle	Farnesol	RBP3
1858	honeysuckle	Farnesol	RETSAT
1859	honeysuckle	Farnesol	RDH13
1860	honeysuckle	Farnesol	DHRS3
1861	honeysuckle	Farnesol	RDH5
1862	honeysuckle	Farnesol	ALDH1A3
1863	honeysuckle	Farnesol	RDH12
1864	honeysuckle	Farnesol	DHRS4
1865	honeysuckle	Farnesol	RBP1
1866	honeysuckle	Farnesol	ALDH1A1
1867	honeysuckle	Farnesol	RLBP1
1868	honeysuckle	Farnesol	RDH14
1869	honeysuckle	Farnesol	RDH8
1870	honeysuckle	Farnesol	LRAT
1871	honeysuckle	Farnesol	ALDH1A2
1872	honeysuckle	Farnesol	ALDH3A1
1873	honeysuckle	Farnesol	RHO
1874	honeysuckle	Farnesol	RS1
1875	honeysuckle	Farnesol	SLC8A1
1876	honeysuckle	Farnesol	F12
1877	honeysuckle	Farnesol	ESR1
1878	honeysuckle	Farnesol	TRPV1
1879	honeysuckle	Farnesol	PGR
1880	honeysuckle	Farnesol	FADS2
1881	honeysuckle	Farnesol	FADS1
1882	honeysuckle	Farnesol	PTGS1
1883	honeysuckle	Farnesol	PTGS2
1884	honeysuckle	Farnesol	ELOVL4
1885	honeysuckle	Farnesol	VDR
1886	honeysuckle	Farnesol	CTSH
1887	honeysuckle	Farnesol	OPN4
1888	honeysuckle	Farnesol	RDH10
1889	honeysuckle	Farnesol	ALDH8A1
1890	honeysuckle	Farnesol	SHBG
1891	honeysuckle	Farnesol	DHRS2
1892	honeysuckle	Farnesol	HSD17B7
1893	honeysuckle	Farnesol	AR
1894	honeysuckle	Farnesol	THRA
1895	honeysuckle	Farnesol	PAX2
1896	honeysuckle	Farnesol	CBR3
1897	honeysuckle	Farnesol	GATA3
1898	honeysuckle	Farnesol	ASCL1
1899	honeysuckle	Farnesol	DLX5
1900	honeysuckle	Farnesol	RET
1901	honeysuckle	Farnesol	THRB
1902	honeysuckle	Farnesol	CRYM
1903	honeysuckle	Farnesol	TSPO
1904	honeysuckle	Farnesol	OPN5
1905	honeysuckle	Farnesol	DHRS9
1906	honeysuckle	Farnesol	CBR1
1907	honeysuckle	Farnesol	CYP1A1
1908	honeysuckle	Nerolidol	ESR1
1909	honeysuckle	Nerolidol	PGR
1910	honeysuckle	Nerolidol	WNT4
1911	honeysuckle	Nerolidol	TFAP2C
1912	honeysuckle	Nerolidol	TNFSF11
1913	honeysuckle	Nerolidol	PHB
1914	honeysuckle	Nerolidol	TOX3
1915	honeysuckle	Nerolidol	TGFB1
1916	honeysuckle	Nerolidol	MED1
1917	honeysuckle	Nerolidol	NKX3-1
1918	honeysuckle	Nerolidol	ESR2
1919	honeysuckle	Nerolidol	NEDD4
1920	honeysuckle	Nerolidol	SHH
1921	honeysuckle	Nerolidol	SERPINB3
1922	honeysuckle	Nerolidol	LEF1
1923	honeysuckle	Nerolidol	FGFR2
1924	honeysuckle	Nerolidol	SRC
1925	honeysuckle	Nerolidol	UBR5
1926	honeysuckle	Nerolidol	AREG
1927	honeysuckle	Nerolidol	CD34
1928	honeysuckle	Nerolidol	GPER1
1929	honeysuckle	Nerolidol	WNT5A
1930	honeysuckle	Nerolidol	SOX9
1931	honeysuckle	Nerolidol	PDGFB
1932	honeysuckle	Nerolidol	VDR
1933	honeysuckle	Nerolidol	TRIM24
1934	honeysuckle	New Triterpennoid Glycoside	GLRA3
1935	honeysuckle	New Triterpennoid Glycoside	NR3C1
1936	honeysuckle	New Triterpennoid Glycoside	ATP1A1
1937	honeysuckle	New Triterpennoid Glycoside	GABRB3
1938	honeysuckle	1-Hexene	KCND1
1939	honeysuckle	1-Hexene	KCNA3
1940	honeysuckle	1-Hexene	PRKAB1
1941	honeysuckle	1-Hexene	ADH1A
1942	honeysuckle	1-Hexene	KCNA10
1943	honeysuckle	1-Hexene	GAMT
1944	honeysuckle	1-Hexene	KCNC3
1945	honeysuckle	1-Hexene	KCNA1
1946	honeysuckle	1-Hexene	KCNA2
1947	honeysuckle	1-Hexene	TPO
1948	honeysuckle	1-Hexene	CAT
1949	honeysuckle	1-Hexene	KCNB1
1950	honeysuckle	1-Hexene	ADH1B
1951	honeysuckle	1-Hexene	DLG4
1952	honeysuckle	1-Hexene	KCNC2
1953	honeysuckle	1-Hexene	KCNC1
1954	honeysuckle	1-Hexene	ADH1C
1955	honeysuckle	1-Hexene	KCNB2
1956	honeysuckle	1-Hexene	KCNA5
1957	honeysuckle	1-Hexene	RNASE1
1958	honeysuckle	1-Hexene	KCND2
1959	honeysuckle	1-Hexene	ALDH2
1960	honeysuckle	1-Hexene	KCNA4
1961	honeysuckle	1-Hexene	KCNA7
1962	honeysuckle	1-Hexene	KCNA6
1963	honeysuckle	1-Hexene	KCND3
1964	honeysuckle	1-Hexene	GUCY1B3
1965	honeysuckle	1-Hexene	GATM
1966	honeysuckle	1-Hexene	KCNK4
1967	honeysuckle	1-Hexene	IYD
1968	honeysuckle	1-Hexene	KCNQ1
1969	honeysuckle	1-Hexene	FBP1
1970	honeysuckle	1-Hexene	DGKI
1971	honeysuckle	1-Hexene	ADH7
1972	honeysuckle	1-Hexene	NFIB
1973	honeysuckle	1-Hexene	CYGB
1974	honeysuckle	1-Hexene	NRXN3
1975	honeysuckle	1-Hexene	LRRC4B
1976	honeysuckle	1-Hexene	AQP8
1977	honeysuckle	1-Hexene	ARX
1978	honeysuckle	1-Hexene	IGF1
1979	honeysuckle	1-Hexene	SHANK3
1980	honeysuckle	1-Hexene	ACY3
1981	honeysuckle	1-Hexene	ASPA
1982	honeysuckle	1-Hexene	NRXN1
1983	honeysuckle	1-Hexene	EDN1
1984	honeysuckle	1-Hexene	OXT
1985	honeysuckle	1-Hexene	MAGI2
1986	honeysuckle	1-Hexene	APOE
1987	honeysuckle	1-Hexene	SOX15
1988	honeysuckle	1-Hexene	CNTNAP4
1989	honeysuckle	1-Hexene	RNASE4
1990	honeysuckle	1-Hexene	RAB3A
1991	honeysuckle	1-Hexene	MC4R
1992	honeysuckle	1-Hexene	IL1B
1993	honeysuckle	1-Hexene	GRIN2A
1994	honeysuckle	1-Hexene	SLC17A7
1995	honeysuckle	1-Hexene	CYP11A1
1996	honeysuckle	1-Hexene	SCN5A
1997	honeysuckle	1-Hexene	SCN10A
1998	honeysuckle	1-Hexene	SPARC
[truncated: 170 more rows]

## Sheet: S4
Table S4 The ingredients and corresponding active targets of dandelion
Num	Herbs	compound	target genes (gene symbol)
1	dandelion	Taraxasterol	VDR
2	dandelion	Taraxasterol	CYP27B1
3	dandelion	Taraxasterol	GC
4	dandelion	Taraxasterol	SNW1
5	dandelion	Taraxasterol	TRPV3
6	dandelion	Taraxasterol	ESR1
7	dandelion	Taraxasterol	PGR
8	dandelion	Taraxasterol	OPRK1
9	dandelion	Taraxasterol	TRPM8
10	dandelion	Taraxasterol	TRPA1
11	dandelion	Taraxasterol	NFKB1
12	dandelion	Taraxasterol	AKR1C3
13	dandelion	Taraxasterol	CYP24A1
14	dandelion	Taraxasterol	GPBAR1
15	dandelion	Taraxasterol	SNAI2
16	dandelion	Taraxasterol	MED1
17	dandelion	Taraxasterol	SNAI1
18	dandelion	Taraxasterol	CYP3A4
19	dandelion	Taraxasterol	CALB1
20	dandelion	Taraxasterol	FGF23
21	dandelion	Taraxasterol	GFI1
22	dandelion	Taraxasterol	LANCL2
23	dandelion	Taraxasterol	WNT4
24	dandelion	Taraxasterol	TCF3
25	dandelion	Taraxasterol	BAX
26	dandelion	Taraxasterol	KL
27	dandelion	Taraxasterol	CYP2R1
28	dandelion	Taraxasterol	PML
29	dandelion	Taraxasterol	B4GALT1
30	dandelion	Taraxasterol	S100G
31	dandelion	Taraxasterol	CYP27A1
32	dandelion	Taraxasterol	KANK2
33	dandelion	Taraxasterol	IRX5
34	dandelion	Taraxasterol	RXRA
35	dandelion	Taraxasterol	NR1H4
36	dandelion	Taraxasterol	TRIM24
37	dandelion	Chrysanthemaxanthin	ADA
38	dandelion	Chrysanthemaxanthin	ITFG2
39	dandelion	Chrysanthemaxanthin	DGUOK
40	dandelion	Chrysanthemaxanthin	XDH
41	dandelion	Chrysanthemaxanthin	ADORA1
42	dandelion	Choline	PLD1
43	dandelion	Choline	PCYT1A
44	dandelion	Choline	PCYT1B
45	dandelion	Choline	PHOSPHO1
46	dandelion	Choline	ACHE
47	dandelion	Choline	PLD2
48	dandelion	Choline	BCHE
49	dandelion	Choline	COLQ
50	dandelion	Choline	SLC5A7
51	dandelion	Choline	HMOX1
52	dandelion	Choline	NRG1
53	dandelion	Choline	DMGDH
54	dandelion	Choline	SIX3
55	dandelion	Choline	RAP1GAP
56	dandelion	Choline	CRP
57	dandelion	Choline	NAPEPLD
58	dandelion	Choline	FSCN1
59	dandelion	Choline	PRSS12
60	dandelion	Choline	KLF5
61	dandelion	Choline	SLC44A4
62	dandelion	Choline	ALDH7A1
63	dandelion	Choline	DNM3
64	dandelion	Choline	PLD4
65	dandelion	Choline	ASCL1
66	dandelion	Choline	GPLD1
67	dandelion	Choline	ENPP6
68	dandelion	Choline	CDH8
69	dandelion	Choline	PLD3
70	dandelion	Choline	PODXL
71	dandelion	Choline	FNTA
72	dandelion	Choline	AGRN
73	dandelion	Choline	CHKA
74	dandelion	Choline	CHDH
75	dandelion	Choline	ATP8B1
76	dandelion	Choline	GRIN1
77	dandelion	Esculetin	DHFR
78	dandelion	Esculetin	LRP2
79	dandelion	Esculetin	PTGDR2
80	dandelion	Esculetin	PLA2G2A
81	dandelion	Esculetin	GLO1
82	dandelion	Esculetin	PPARG
83	dandelion	Esculetin	PTGR2
84	dandelion	Esculetin	PTGS1
85	dandelion	Esculetin	PTGS2
86	dandelion	Esculetin	PPARA
87	dandelion	Esculetin	CRYZ
88	dandelion	Esculetin	VKORC1
89	dandelion	Esculetin	NQO1
90	dandelion	Scopoletin	COMT
91	dandelion	Scopoletin	SEC14L3
92	dandelion	Scopoletin	PPP2CA
93	dandelion	Scopoletin	PRKCA
94	dandelion	Scopoletin	NR1I2
95	dandelion	Scopoletin	ALOX5
96	dandelion	Scopoletin	PPP2CB
97	dandelion	Scopoletin	SEC14L2
98	dandelion	Scopoletin	DGKA
99	dandelion	Scopoletin	PRKCB
100	dandelion	Scopoletin	SEC14L4
101	dandelion	Caffeicacid	AR
102	dandelion	Caffeicacid	IFNG
103	dandelion	Caffeicacid	TPMT
104	dandelion	Taraxerol	ESR1
105	dandelion	Taraxerol	PGR
106	dandelion	Taraxerol	VDR
107	dandelion	Taraxerol	CYP27B1
108	dandelion	Taraxerol	GC
109	dandelion	Taraxerol	SNW1
110	dandelion	Taraxerol	RDH11
111	dandelion	Taraxerol	SRD5A1
112	dandelion	Taraxerol	RBP3
113	dandelion	Taraxerol	RETSAT
114	dandelion	Taraxerol	RDH13
115	dandelion	Taraxerol	DHRS3
116	dandelion	Taraxerol	RDH5
117	dandelion	Taraxerol	F12
118	dandelion	Taraxerol	AR
119	dandelion	Taraxerol	NR3C1
120	dandelion	Taraxerol	ALDH1A3
121	dandelion	Taraxerol	RDH12
122	dandelion	Taraxerol	DHRS4
123	dandelion	Taraxerol	RBP1
124	dandelion	Taraxerol	ALDH1A1
125	dandelion	Taraxerol	RLBP1
126	dandelion	Taraxerol	RDH14
127	dandelion	Taraxerol	RDH8
128	dandelion	Taraxerol	ANXA1
129	dandelion	Taraxerol	LRAT
130	dandelion	Taraxerol	ALDH1A2
131	dandelion	Taraxerol	NFKB1
132	dandelion	Taraxerol	AKR1C3
133	dandelion	Taraxerol	CYP24A1
134	dandelion	Taraxerol	GPBAR1
135	dandelion	Taraxerol	SNAI2
136	dandelion	Taraxerol	MED1
137	dandelion	Taraxerol	SNAI1
138	dandelion	Taraxerol	CYP3A4
139	dandelion	Taraxerol	CALB1
140	dandelion	Taraxerol	FGF23
141	dandelion	Taraxerol	GFI1
142	dandelion	Taraxerol	LANCL2
143	dandelion	Taraxerol	WNT4
144	dandelion	Taraxerol	TCF3
145	dandelion	Taraxerol	BAX
146	dandelion	Taraxerol	KL
147	dandelion	Taraxerol	CYP2R1
148	dandelion	Taraxerol	PML
149	dandelion	Taraxerol	B4GALT1
150	dandelion	Taraxerol	S100G
151	dandelion	Taraxerol	CYP27A1
152	dandelion	Taraxerol	KANK2
153	dandelion	Taraxerol	IRX5
154	dandelion	Taraxerol	RXRA
155	dandelion	Taraxerol	NR1H4
156	dandelion	Taraxerol	TRIM24
157	dandelion	Flavoxanthin	ADA
158	dandelion	Flavoxanthin	ITFG2
159	dandelion	Flavoxanthin	DGUOK
160	dandelion	Flavoxanthin	XDH
161	dandelion	Flavoxanthin	ADORA1

## Sheet: S5
Table S5 The ingredients and corresponding active targets of centipede
Num	Herbs	compound	target genes (gene symbol)
1	centipede	Histamine	HRH3
2	centipede	Histamine	HRH4
3	centipede	Histamine	HRH1
4	centipede	Histamine	HRH2
5	centipede	Histamine	SCT
6	centipede	Histamine	SLC38A3
7	centipede	Histamine	HDC
8	centipede	Histamine	HAL
9	centipede	Histamine	HARS
10	centipede	Histamine	LILRB1
11	centipede	Histamine	LHCGR
12	centipede	Histamine	HTR1B
13	centipede	Histamine	HTR6
14	centipede	Histamine	PTK2B
15	centipede	Histamine	MAOB
16	centipede	Histamine	P2RY1
17	centipede	Histamine	ZNF219
18	centipede	Histamine	POU1F1
19	centipede	Histamine	GPER1
20	centipede	Tyrosin	TH
21	centipede	Tyrosin	TAT
22	centipede	Tyrosin	YARS
23	centipede	Tyrosin	YARS2
24	centipede	Tyrosin	SLC7A8
25	centipede	Tyrosin	ADRA2A
26	centipede	Tyrosin	FARS2
27	centipede	Tyrosin	DRD2
28	centipede	Tyrosin	PAH
29	centipede	Tyrosin	FARSA
30	centipede	Tyrosin	DDC
31	centipede	Tyrosin	DRD4
32	centipede	Tyrosin	DRD3
33	centipede	Tyrosin	FARSB
34	centipede	Tyrosin	DRD5
35	centipede	Tyrosin	DRD1
36	centipede	Tyrosin	BCO2
37	centipede	Tyrosin	PNMT
38	centipede	Tyrosin	CXCL8
39	centipede	Tyrosin	GPR143
40	centipede	Tyrosin	ADRA1A
41	centipede	Tyrosin	ADRB2
42	centipede	Tyrosin	ADRB1
43	centipede	Tyrosin	ADRA1D
44	centipede	Tyrosin	GABBR2
45	centipede	Tyrosin	ADRA1B
46	centipede	Tyrosin	ADRA2C
47	centipede	Tyrosin	ADRB3
48	centipede	Tyrosin	GABBR1
49	centipede	Tyrosin	ADRA2B
50	centipede	Tyrosin	SLC6A2
51	centipede	Tyrosin	SLC6A3
52	centipede	Tyrosin	SLC6A4
53	centipede	Tyrosin	HTR7
54	centipede	Tyrosin	HTR1A
55	centipede	Tyrosin	DBH
56	centipede	Tyrosin	SCN2B
57	centipede	Tyrosin	GOT2
58	centipede	Tyrosin	CCBL1
59	centipede	Tyrosin	DNMT3A
60	centipede	Tyrosin	HGD
61	centipede	Tyrosin	MBD1
62	centipede	Tyrosin	OXT
63	centipede	Tyrosin	APLP1
64	centipede	Tyrosin	HAND2
65	centipede	Tyrosin	DARS2
66	centipede	Tyrosin	GSTZ1
67	centipede	Tyrosin	GRIN2A
68	centipede	Tyrosin	GOT1
69	centipede	Tyrosin	CYP11A1
70	centipede	Tyrosin	INSM1
71	centipede	Tyrosin	HPD
72	centipede	Tyrosin	NOS2
73	centipede	Tyrosin	AARS2
74	centipede	Tyrosin	ATP7A
75	centipede	Tyrosin	CYP2D6
76	centipede	Tyrosin	CNR1
77	centipede	Tyrosin	GATA3
78	centipede	Tyrosin	EARS2
79	centipede	Tyrosin	CRH
80	centipede	Tyrosin	STAR
81	centipede	Tyrosin	ATP13A2
82	centipede	Tyrosin	LRRK2
83	centipede	Tyrosin	TARS2
84	centipede	Tyrosin	BDNF
85	centipede	Tyrosin	ABCB4
86	centipede	Tyrosin	SRD5A2
87	centipede	Tyrosin	NOS3
88	centipede	Tyrosin	SLC9A3R1
89	centipede	Tyrosin	CD34
90	centipede	Tyrosin	PARK2
91	centipede	Tyrosin	FAH
92	centipede	Tyrosin	NOS1
93	centipede	Tyrosin	GRIN1
94	centipede	L-Histidine	SLC38A3
95	centipede	L-Histidine	HDC
96	centipede	L-Histidine	HAL
97	centipede	L-Histidine	HARS
98	centipede	L-Histidine	WARS2
99	centipede	L-Histidine	WARS
100	centipede	L-Histidine	PCK1
101	centipede	L-Histidine	PRG3
102	centipede	L-Histidine	SLC38A7
103	centipede	L-Histidine	HARS2
104	centipede	L-Histidine	SLC7A8
105	centipede	L-Histidine	FCER1G
106	centipede	L-Histidine	TH
107	centipede	L-Histidine	TAT
108	centipede	L-Histidine	FARS2
109	centipede	L-Histidine	PAH
110	centipede	L-Histidine	FARSA
111	centipede	L-Histidine	FCER1A
112	centipede	L-Histidine	FARSB
113	centipede	L-Histidine	SLC1A5
114	centipede	L-Histidine	SLC1A4
115	centipede	L-Histidine	AMDHD1
116	centipede	L-Histidine	MTHFD1L
117	centipede	L-Histidine	TRH
118	centipede	L-Histidine	SDSL
119	centipede	L-Histidine	BCO2
120	centipede	L-Histidine	PNMT
121	centipede	L-Histidine	SLC19A2
122	centipede	L-Histidine	HNMT
123	centipede	L-Histidine	JUN
124	centipede	L-Histidine	LEP
125	centipede	L-Histidine	UROC1
126	centipede	L-Histidine	DDC
127	centipede	L-Histidine	C2orf83
128	centipede	L-Histidine	FTCD
129	centipede	L-Histidine	C3
130	centipede	L-Histidine	SDS
131	centipede	L-Histidine	SLC19A3
132	centipede	L-Histidine	MS4A2
133	centipede	L-Histidine	SYK
134	centipede	L-Histidine	MTHFS
135	centipede	L-Histidine	SRR
136	centipede	Cholesterol	VDR
137	centipede	Cholesterol	CYP27B1
138	centipede	Cholesterol	GC
139	centipede	Cholesterol	SNW1
140	centipede	Cholesterol	ESR1
141	centipede	Cholesterol	PGR
142	centipede	Cholesterol	NFKB1
143	centipede	Cholesterol	AKR1C3
144	centipede	Cholesterol	CYP24A1
145	centipede	Cholesterol	GPBAR1
146	centipede	Cholesterol	SNAI2
147	centipede	Cholesterol	MED1
148	centipede	Cholesterol	SNAI1
149	centipede	Cholesterol	CYP3A4
150	centipede	Cholesterol	CALB1
151	centipede	Cholesterol	FGF23
152	centipede	Cholesterol	GFI1
153	centipede	Cholesterol	LANCL2
154	centipede	Cholesterol	WNT4
155	centipede	Cholesterol	TCF3
156	centipede	Cholesterol	BAX
157	centipede	Cholesterol	KL
158	centipede	Cholesterol	CYP2R1
159	centipede	Cholesterol	PML
160	centipede	Cholesterol	B4GALT1
161	centipede	Cholesterol	S100G
162	centipede	Cholesterol	CYP27A1
163	centipede	Cholesterol	KANK2
164	centipede	Cholesterol	IRX5
165	centipede	Cholesterol	RXRA
166	centipede	Cholesterol	NR1H4
167	centipede	Cholesterol	TRIM24
168	centipede	Leucine	SLC25A20
169	centipede	Leucine	OAZ3
170	centipede	Leucine	SLC7A2
171	centipede	Leucine	P3H3
172	centipede	Leucine	IARS2
173	centipede	Leucine	BCAT1
174	centipede	Leucine	VARS
175	centipede	Leucine	PPIG
176	centipede	Leucine	SLC25A15
177	centipede	Leucine	LCMT1
178	centipede	Leucine	PPIC
179	centipede	Leucine	MPO
180	centipede	Leucine	SLC25A29
181	centipede	Leucine	GATM
182	centipede	Leucine	SLC22A4
183	centipede	Leucine	CPT2
184	centipede	Leucine	PYCR1
185	centipede	Leucine	PRODH
186	centipede	Leucine	LARS
187	centipede	Leucine	PARS2
188	centipede	Leucine	ARG1
189	centipede	Leucine	OAT
190	centipede	Leucine	PPIA
191	centipede	Leucine	OAZ2
192	centipede	Leucine	SLC25A2
193	centipede	Leucine	SLC6A14
194	centipede	Leucine	PPIF
195	centipede	Leucine	SLC7A3
196	centipede	Leucine	EPRS
197	centipede	Leucine	CES1
198	centipede	Leucine	OAZ1
199	centipede	Leucine	KARS
200	centipede	Leucine	LARS2
201	centipede	Leucine	P4HA1
202	centipede	Leucine	PPIH
203	centipede	Leucine	PYCR2
204	centipede	Leucine	L3HYPDH
205	centipede	Leucine	PROSC
206	centipede	Leucine	SLC7A1
207	centipede	Leucine	ACADSB
208	centipede	Leucine	SLC7A4
209	centipede	Leucine	CPT1A
210	centipede	Leucine	PYCRL
211	centipede	Leucine	PCCB
212	centipede	Leucine	OTC
213	centipede	Leucine	XDH
214	centipede	Leucine	P3H2
215	centipede	Leucine	ARG2
216	centipede	Leucine	CROT
217	centipede	Leucine	IARS
218	centipede	Leucine	ALAD
219	centipede	Leucine	SLC22A5
220	centipede	Leucine	SLC6A7
221	centipede	Leucine	P4HA2
222	centipede	Leucine	CRAT
223	centipede	Leucine	BCAT2
224	centipede	Leucine	LCMT2
225	centipede	Leucine	P3H1
226	centipede	Leucine	PPIB
